# Supplementary material for: An Efficient, Optimized Synthesis of Fentanyl and Related Analogs
Source: PubMed Central journal article supplement (PMC4169472; doi:10.1371/journal.pone.0108250), 2014-09-18

# An efficient, optimized synthesis of fentanyl and related analogs

Carlos A. Valdez, Roald N. Leif and Brian P. Mayer\*

*Forensic Science Center, Lawrence Livermore National Laboratory  
Livermore, CA 94550 USA*

- Supporting Information -

| <b>Content</b>                                                                            | <b>Page</b> |
|-------------------------------------------------------------------------------------------|-------------|
| <sup>1</sup> H NMR of N-phenylethylpiperidin-4-one ( <b>13</b> )                          | S2          |
| <sup>13</sup> C NMR of N-phenylethylpiperidin-4-one ( <b>13</b> )                         | S3          |
| <sup>1</sup> H NMR of N-[1-(2-phenylethyl)-4-piperidinyl]aniline ( <b>14</b> )            | S4          |
| <sup>13</sup> C NMR of N-[1-(2-phenylethyl)-4-piperidinyl]aniline ( <b>14</b> )           | S5          |
| <sup>1</sup> H NMR of Fentanyl ( <b>4</b> )                                               | S6          |
| <sup>13</sup> C NMR of Fentanyl ( <b>4</b> )                                              | S7          |
| <sup>1</sup> H NMR of Fentanyl hydrochloride ( <b>15</b> )                                | S8          |
| <sup>13</sup> C NMR of Fentanyl hydrochloride ( <b>15</b> )                               | S9          |
| <sup>1</sup> H NMR of Fentanyl citrate ( <b>16</b> )                                      | S10         |
| <sup>13</sup> C NMR of Fentanyl citrate ( <b>16</b> )                                     | S11         |
| <sup>1</sup> H NMR of Acetylfentanyl ( <b>9</b> )                                         | S12         |
| <sup>13</sup> C NMR of Acetylfentanyl ( <b>9</b> )                                        | S13         |
| <sup>1</sup> H NMR of Acetylfentanyl hydrochloride ( <b>17</b> )                          | S14         |
| <sup>13</sup> C NMR of Acetylfentanyl hydrochloride ( <b>17</b> )                         | S15         |
| <sup>1</sup> H NMR of Acetylfentanyl citrate ( <b>18</b> )                                | S16         |
| <sup>13</sup> C NMR of Acetylfentanyl citrate ( <b>18</b> )                               | S17         |
| <sup>1</sup> H NMR of 2-(Thiophen-2-yl)ethyl methanesulfonate ( <b>19</b> )               | S18         |
| <sup>13</sup> C NMR of 2-(Thiophen-2-yl)ethyl methanesulfonate ( <b>19</b> )              | S19         |
| <sup>1</sup> H NMR of N-[2-(2-thienyl)ethyl]-4-piperidinone ( <b>20</b> )                 | S20         |
| <sup>13</sup> C NMR of N-[2-(2-thienyl)ethyl]-4-piperidinone ( <b>20</b> )                | S21         |
| <sup>1</sup> H NMR of N-phenyl-1-(2-(thiophen-2-yl)ethyl)piperidin-4-amine ( <b>21</b> )  | S22         |
| <sup>13</sup> C NMR of N-phenyl-1-(2-(thiophen-2-yl)ethyl)piperidin-4-amine ( <b>21</b> ) | S23         |
| <sup>1</sup> H NMR of Thiofentanyl ( <b>10</b> )                                          | S24         |
| <sup>13</sup> C NMR of Thiofentanyl ( <b>10</b> )                                         | S25         |
| <sup>1</sup> H NMR of Thiofentanyl hydrochloride ( <b>23</b> )                            | S26         |
| <sup>13</sup> C NMR of Thiofentanyl hydrochloride ( <b>23</b> )                           | S27         |
| <sup>1</sup> H NMR of Thiofentanyl citrate ( <b>24</b> )                                  | S28         |
| <sup>13</sup> C NMR of Thiofentanyl citrate ( <b>24</b> )                                 | S29         |
| <sup>1</sup> H NMR of Acetylthiofentanyl ( <b>11</b> )                                    | S30         |
| <sup>13</sup> C NMR of Acetylthiofentanyl ( <b>11</b> )                                   | S31         |
| <sup>1</sup> H NMR of Acetylthiofentanyl hydrochloride ( <b>25</b> )                      | S32         |
| <sup>13</sup> C NMR of Acetylthiofentanyl hydrochloride ( <b>25</b> )                     | S33         |
| <sup>1</sup> H NMR of Acetylthiofentanyl citrate ( <b>26</b> )                            | S34         |
| <sup>13</sup> C NMR of Acetylthiofentanyl citrate ( <b>26</b> )                           | S35         |

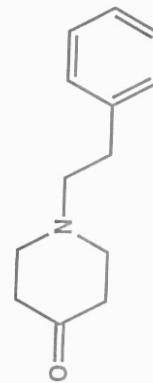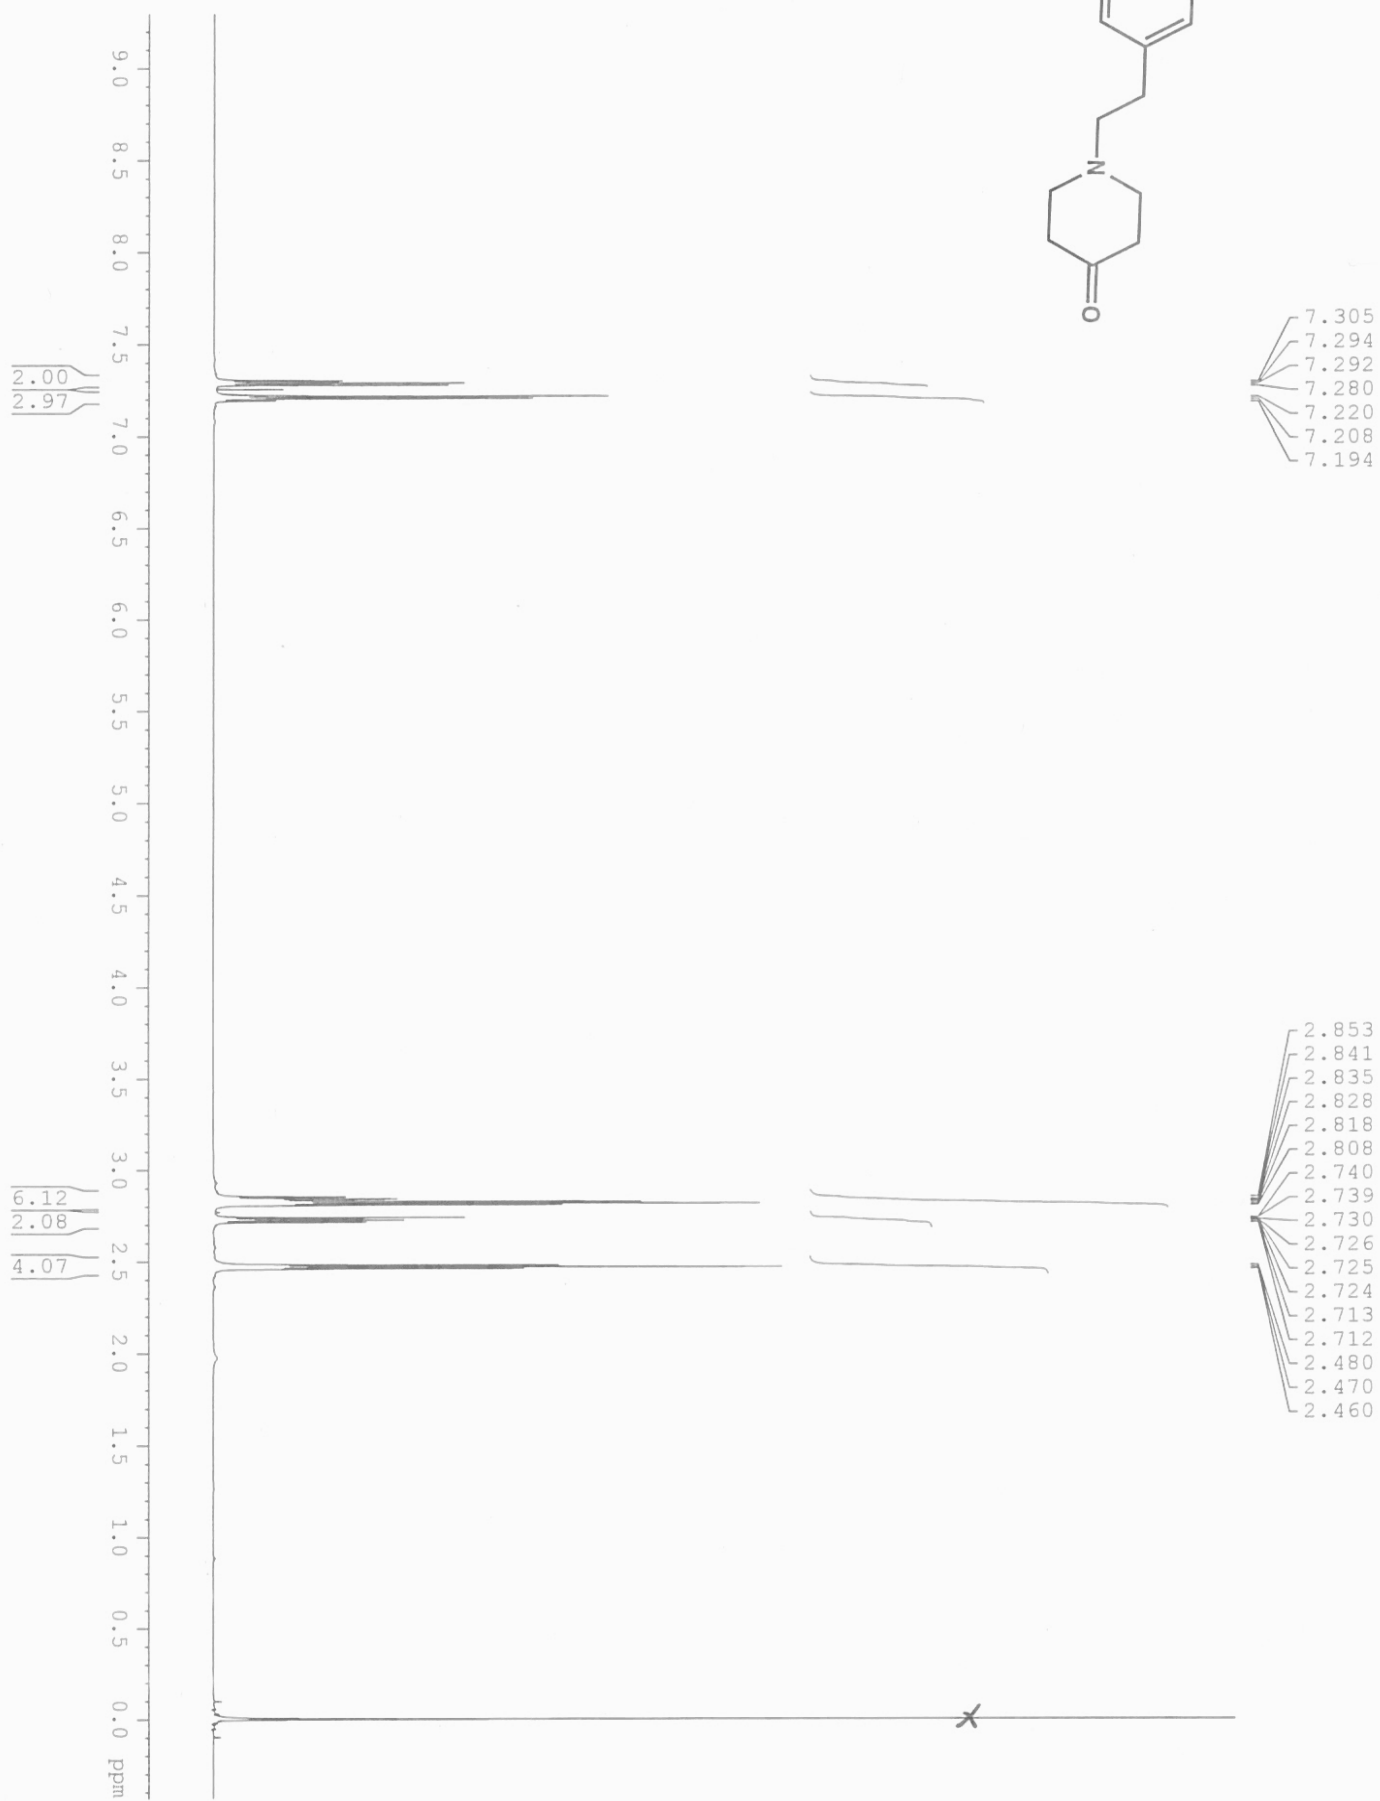

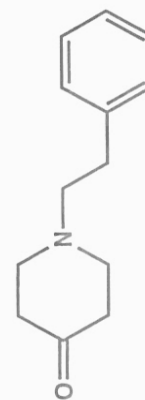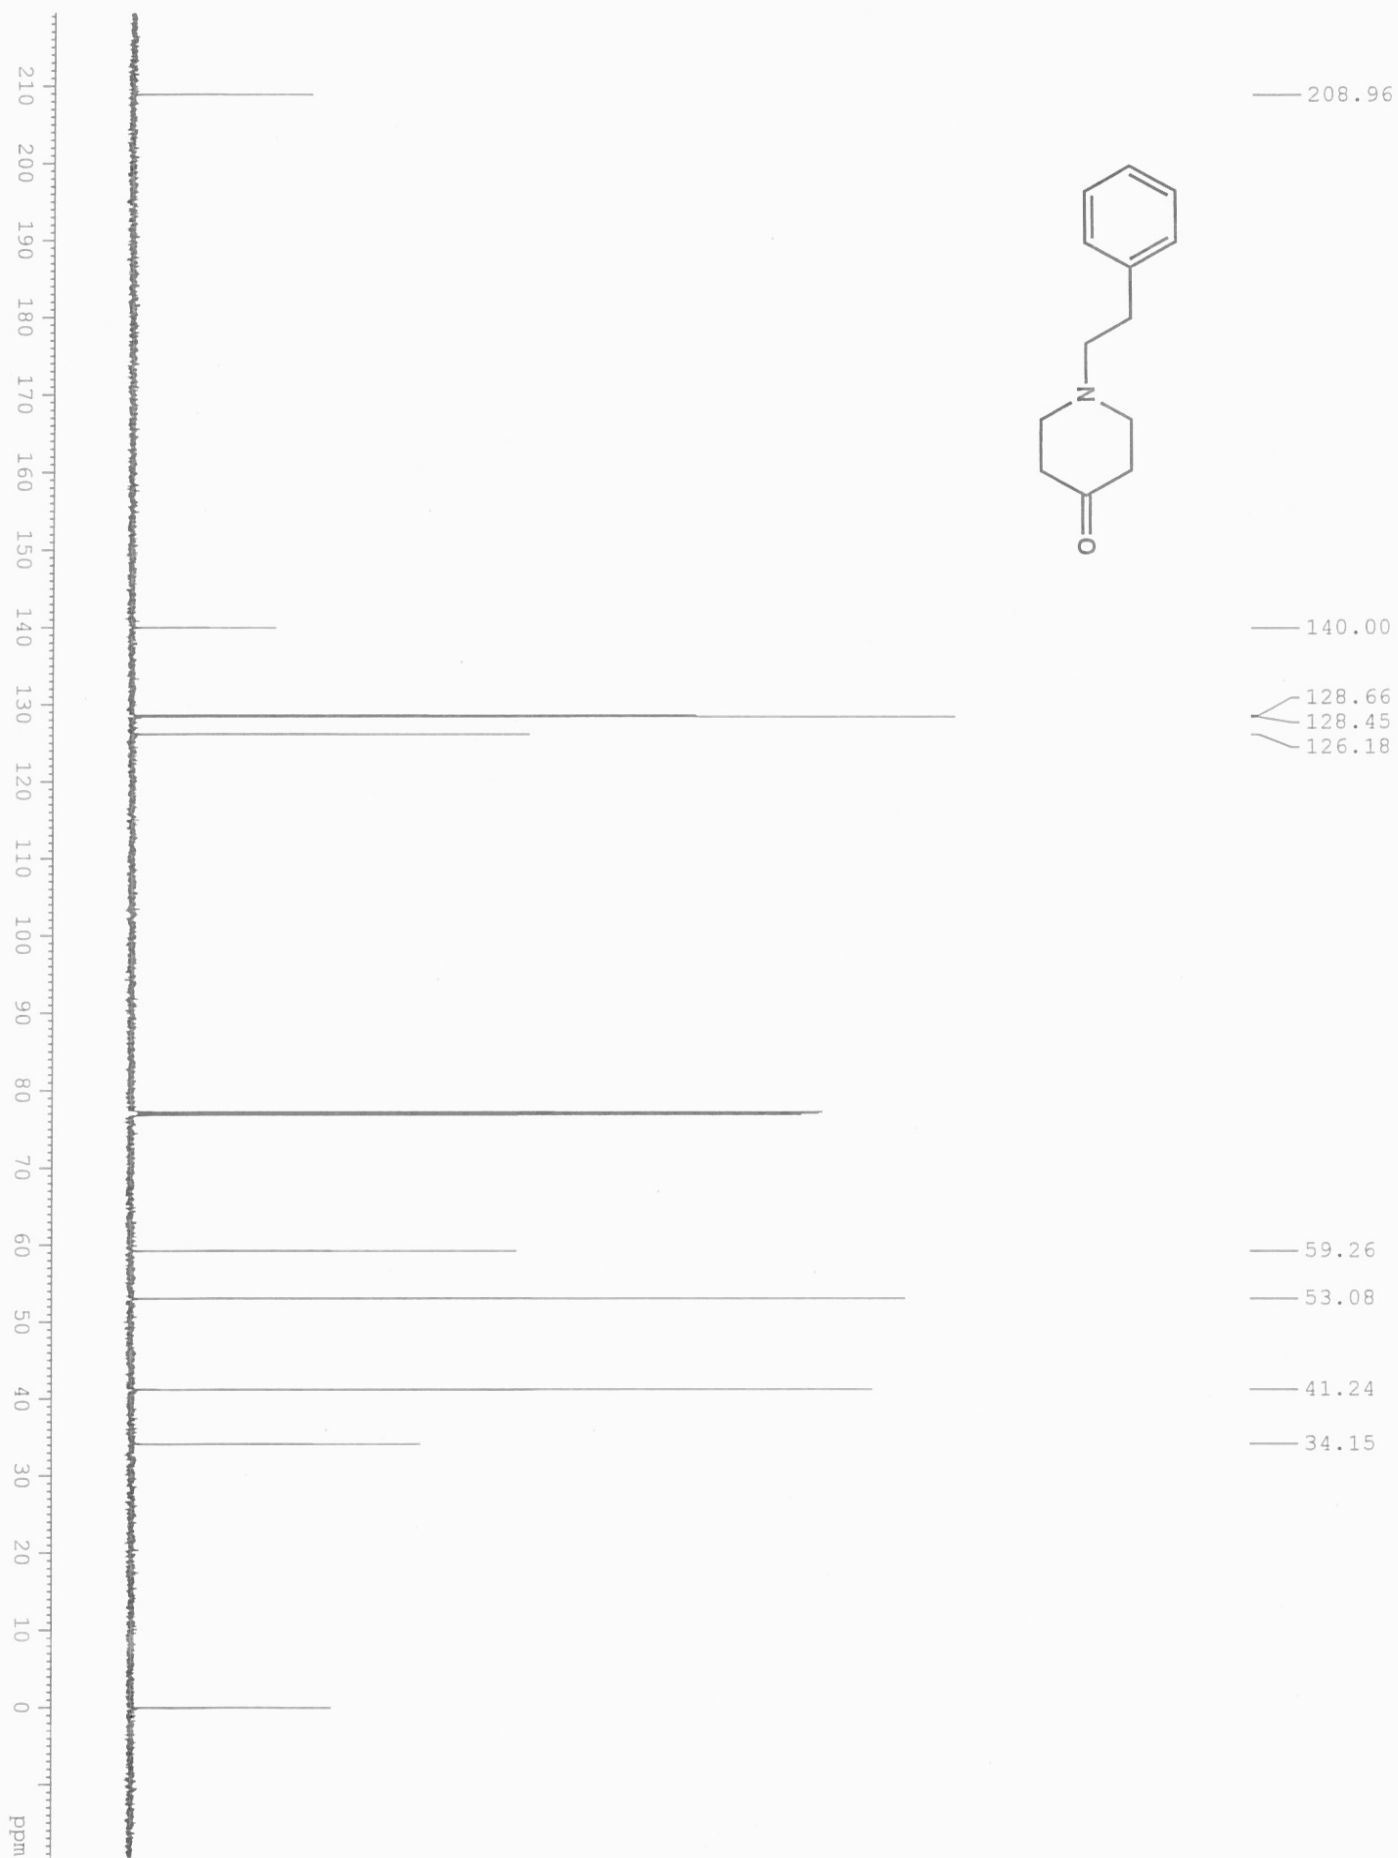

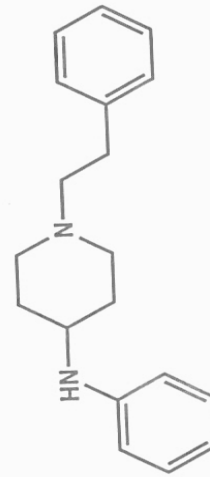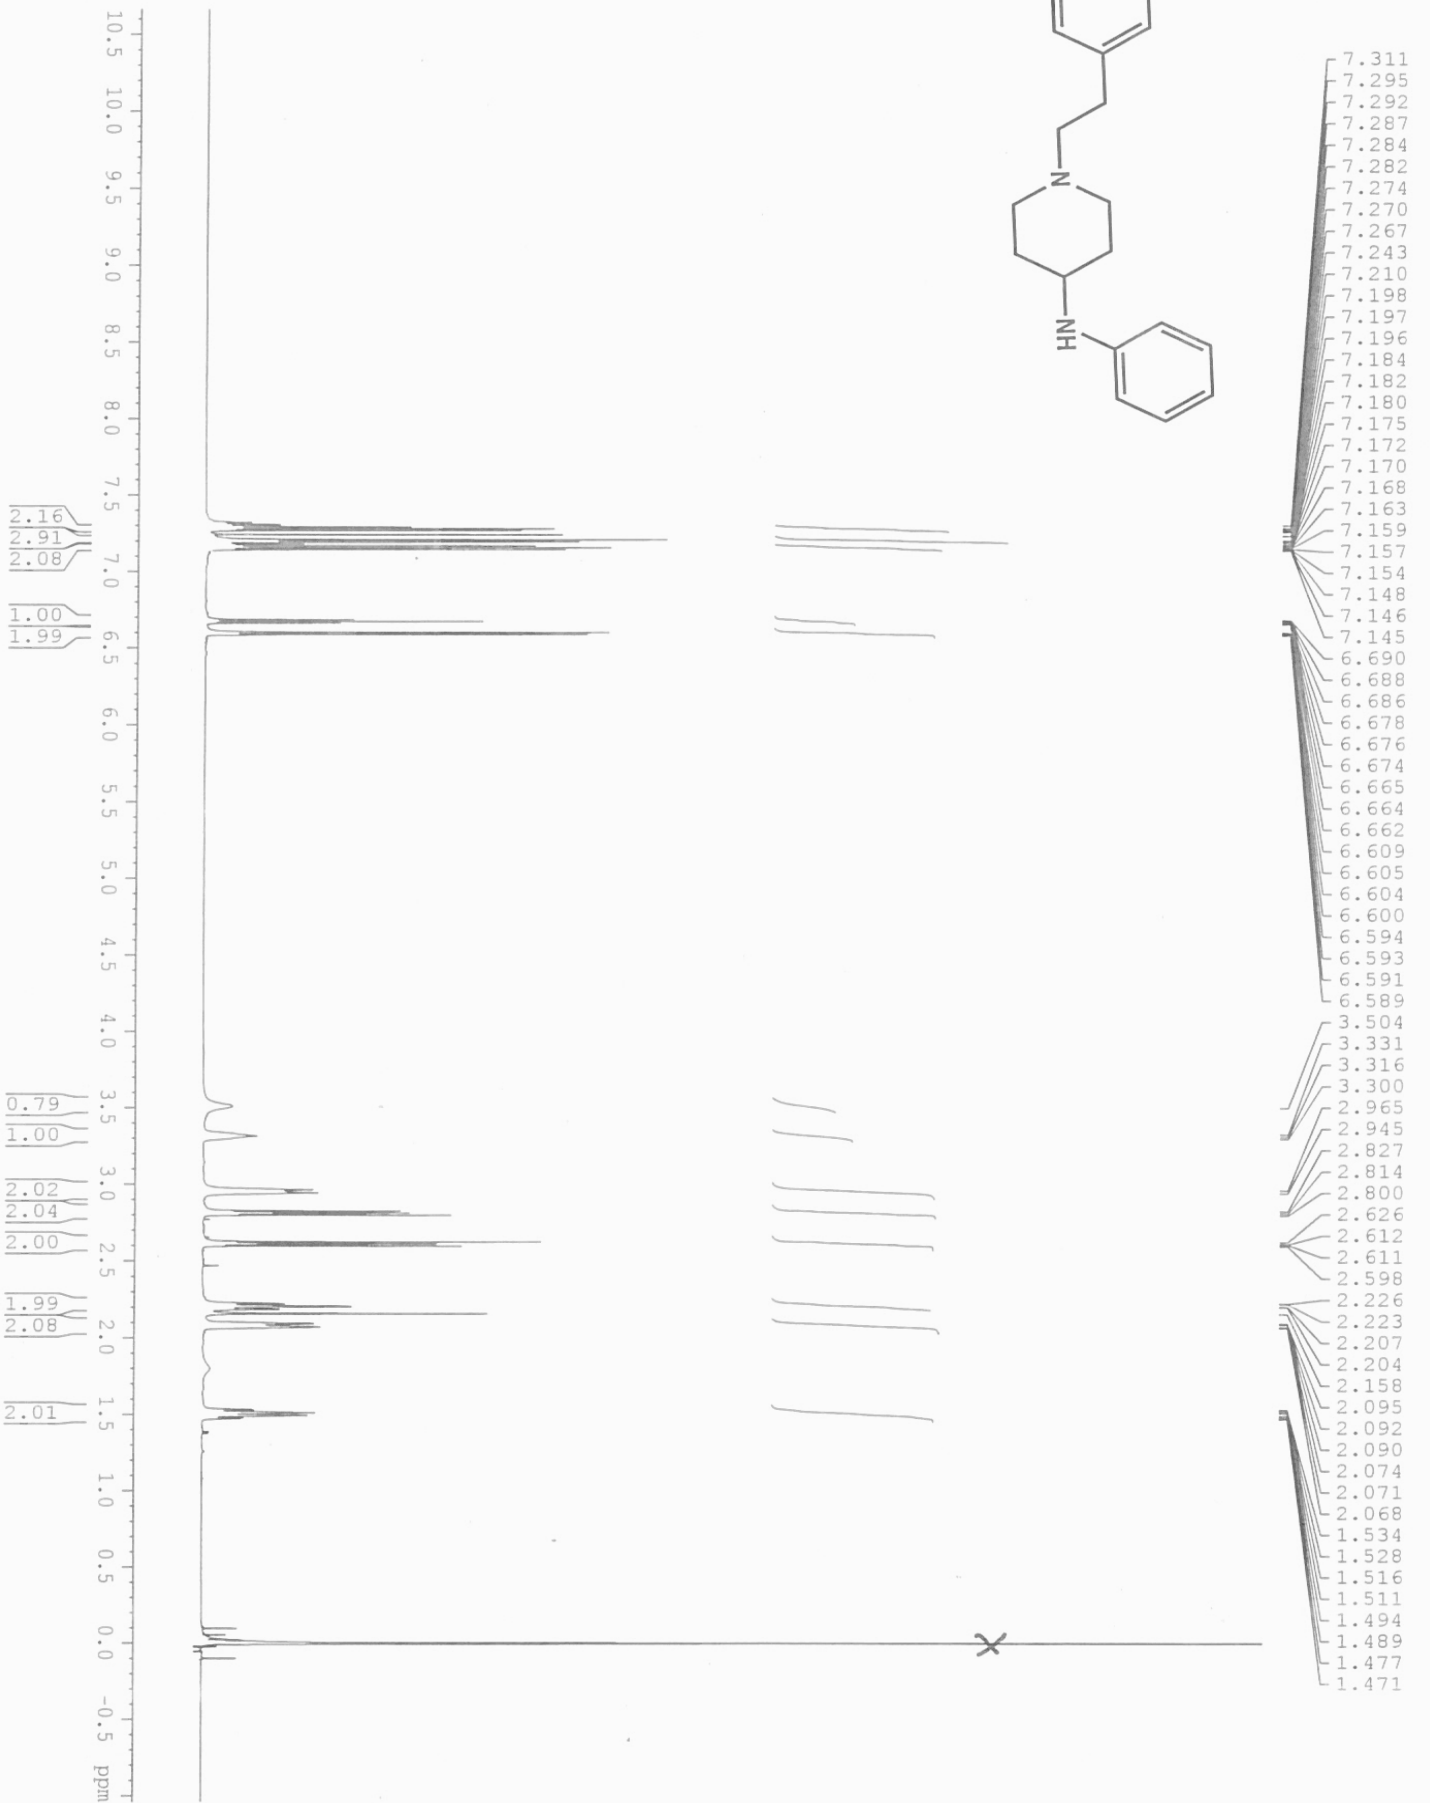



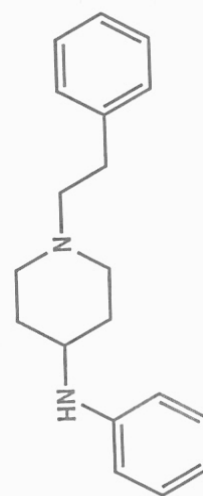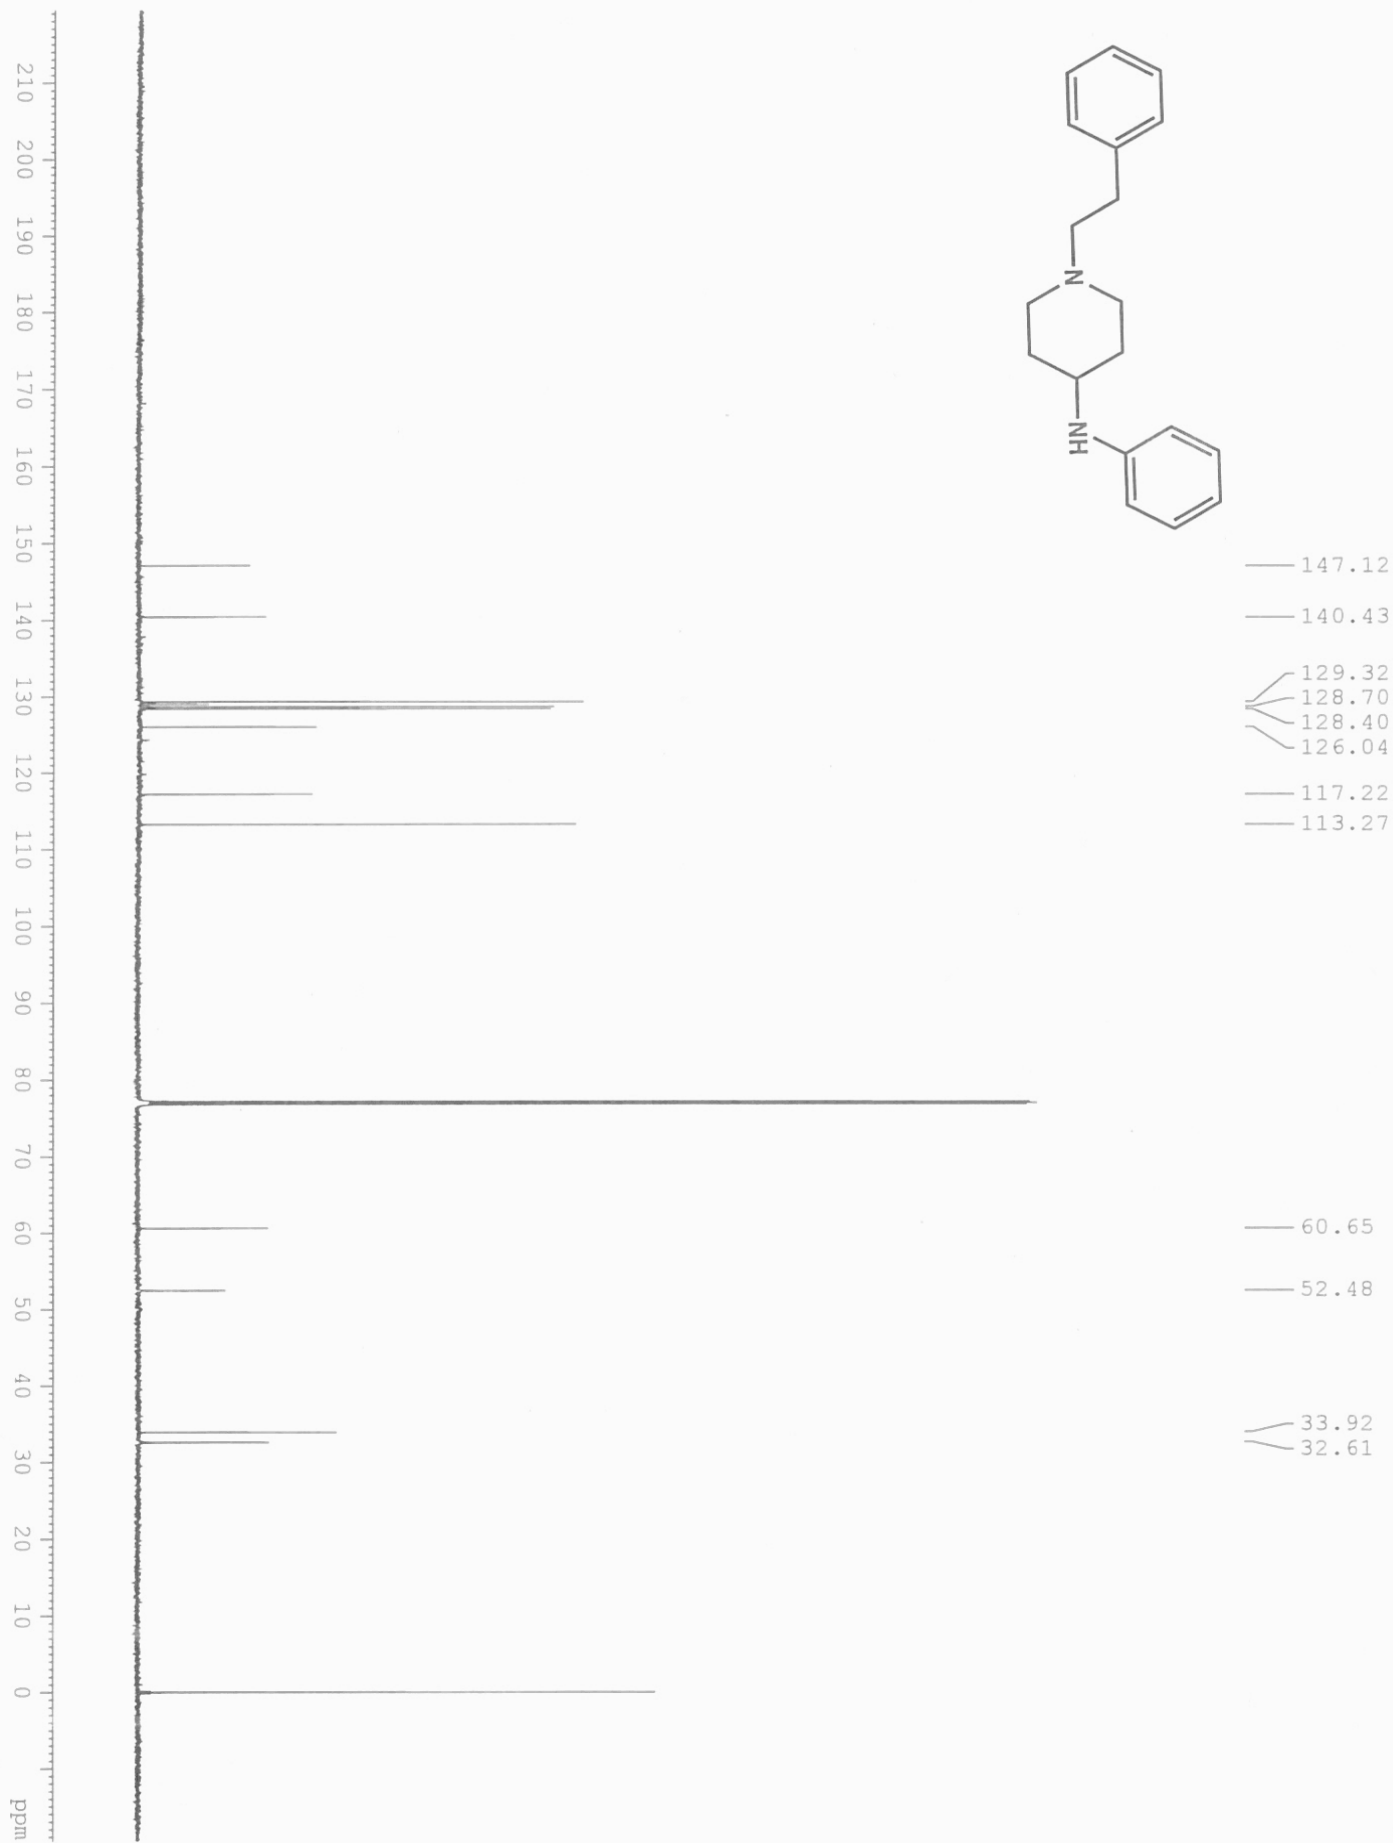

Fentanyl (Free base)  
CV8-134  
01-07-14

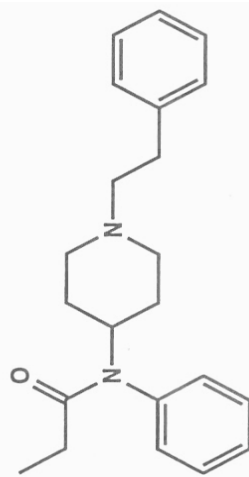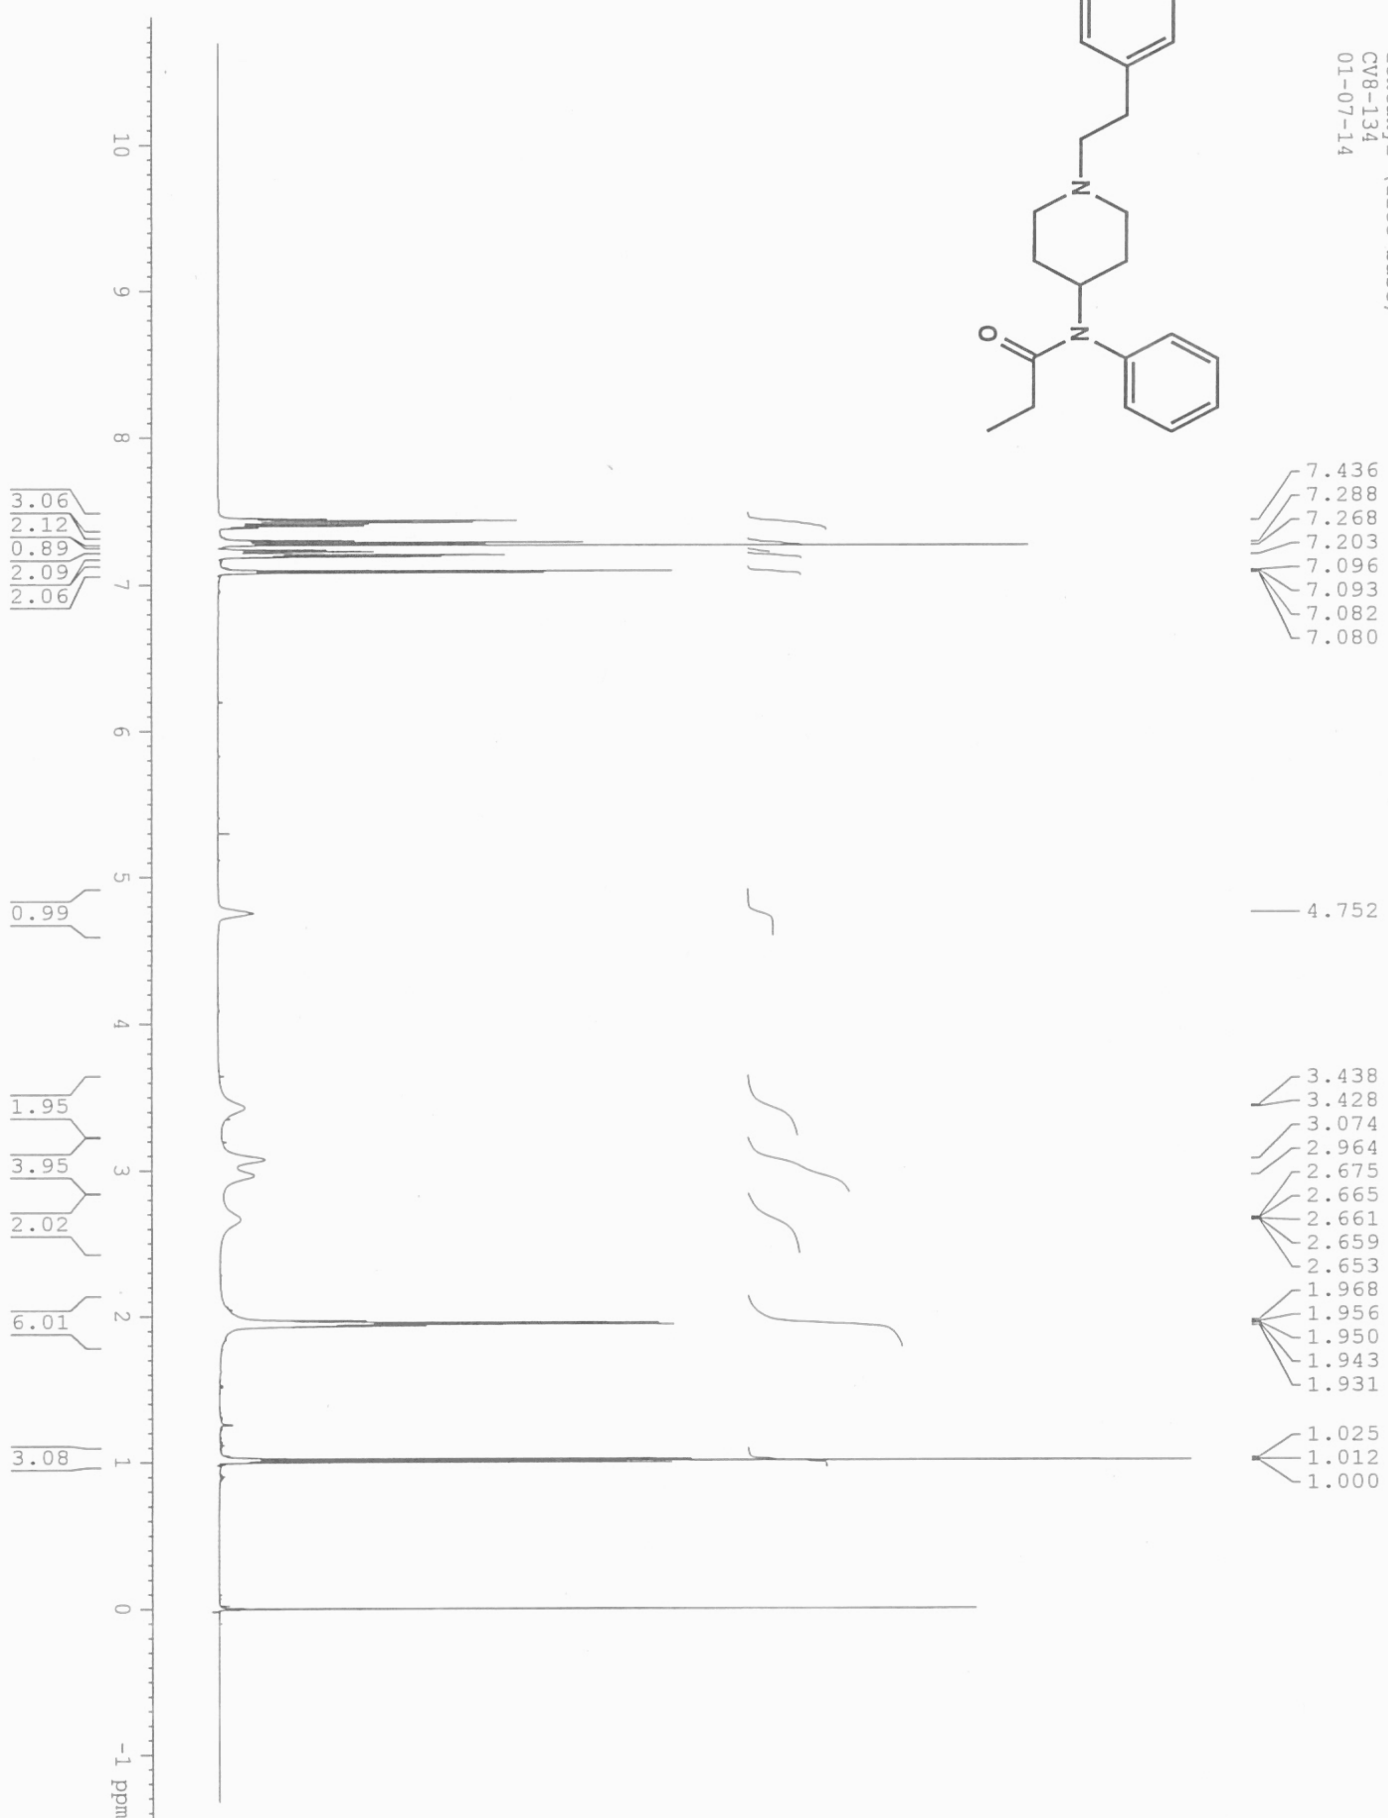

Fentanyl (Free base)  
CV8-134  
1-7-14

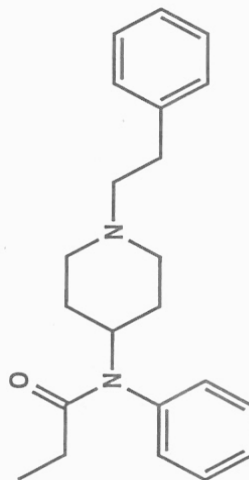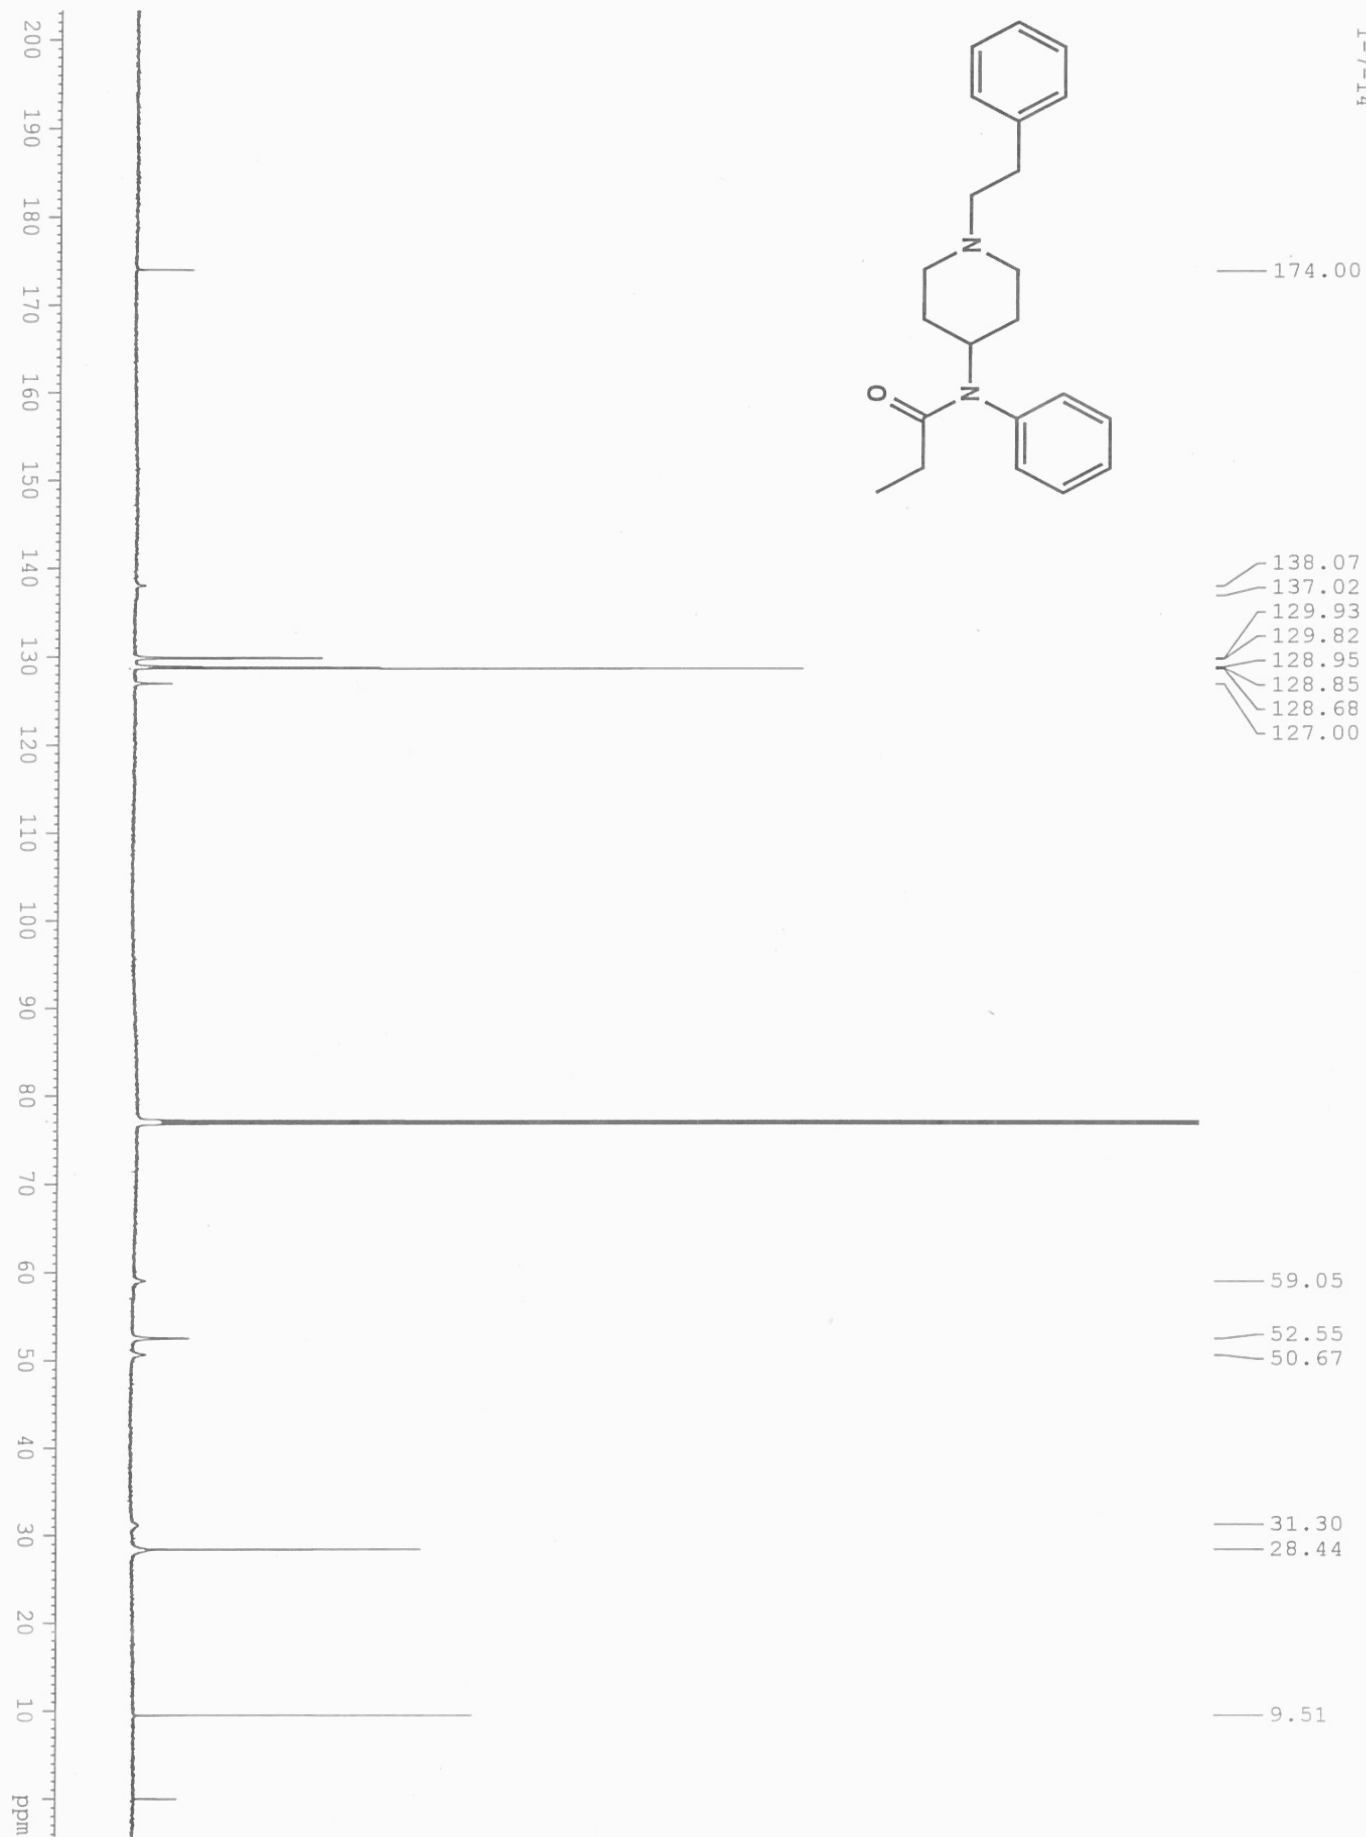

Fentanyl1 (HCl salt)  
CV8-148  
1-23-14

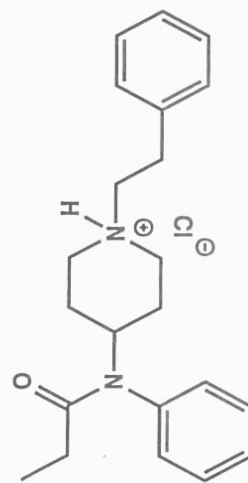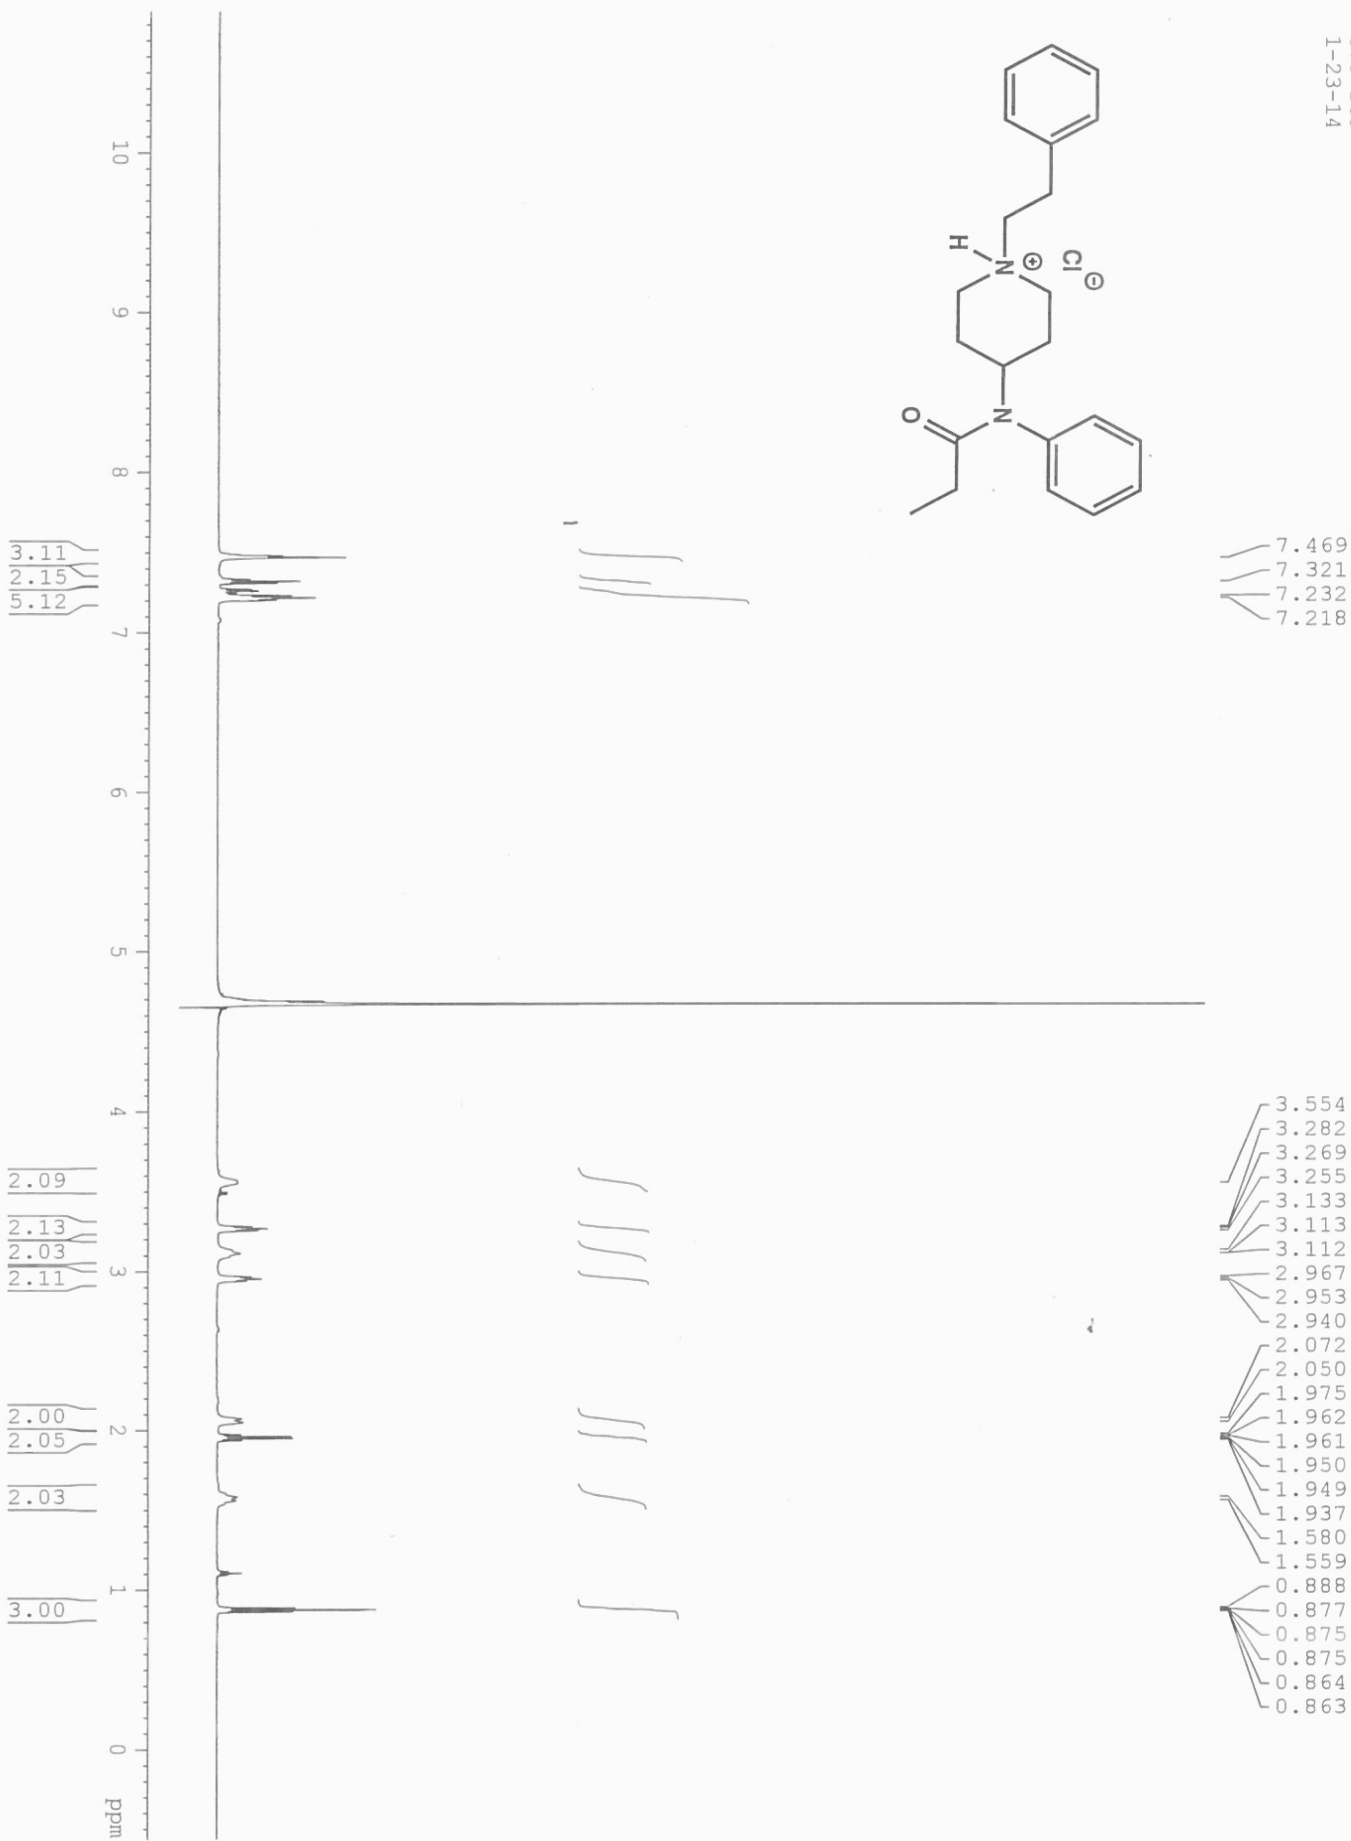

Fentanyl (HCl salt)  
CV8-148  
1-23-14

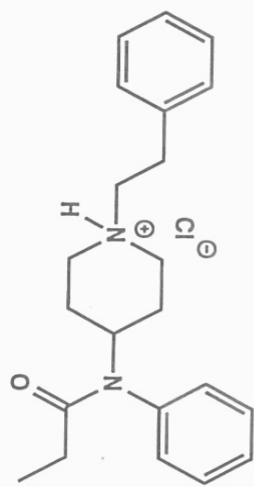

— 177.49

137.19  
136.26  
129.80  
129.28  
129.09  
128.76  
127.38

— 57.58

52.10  
50.00

29.84  
28.22  
27.46

— 9.02

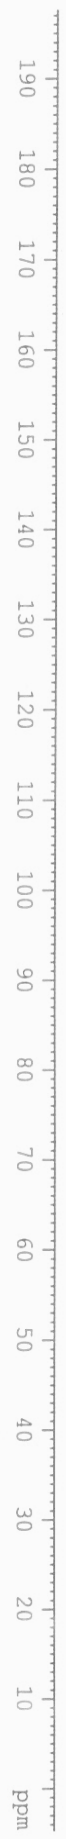

fentanyl (citrate salt)  
CV8-139  
01/08/14

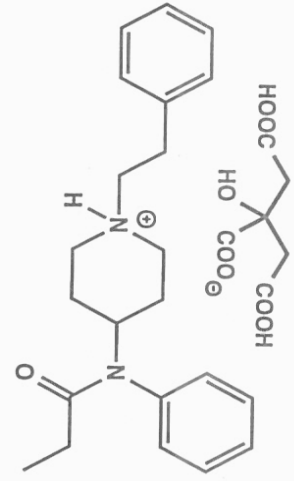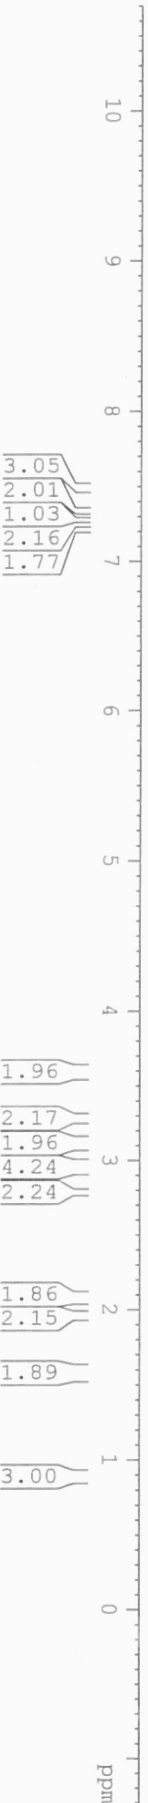

- 7.492
- 7.480
- 7.337
- 7.324
- 7.252
- 7.251
- 7.238
- 7.221
- 7.208

- 3.596
- 3.574
- 3.296
- 3.290
- 3.289
- 3.289
- 3.282
- 3.268
- 3.133
- 3.129
- 3.111
- 3.107
- 3.090
- 3.086
- 2.983
- 2.969
- 2.957
- 2.931
- 2.794
- 2.768
- 2.089
- 2.066
- 1.978
- 1.966
- 1.953
- 1.941
- 1.612
- 1.605
- 1.589
- 1.583
- 1.567
- 1.562
- 1.545
- 1.539
- 0.900
- 0.888
- 0.887
- 0.875

Fentanyl citrate  
CV8-139  
01/08/14

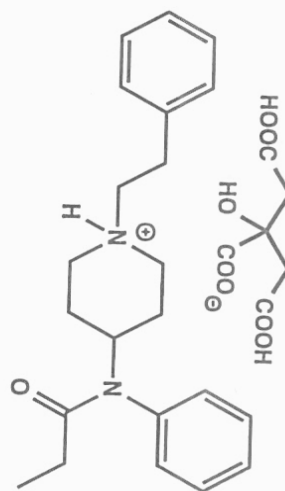

177.48  
177.07  
173.60

137.19  
136.27  
129.80  
129.29  
129.10  
128.77  
127.38

73.38

57.58

52.10

49.99

43.34

29.85

28.23

27.46

9.03

200  
190  
180  
170  
160  
150  
140  
130  
120  
110  
100  
90  
80  
70  
60  
50  
40  
30  
20  
10  
ppm

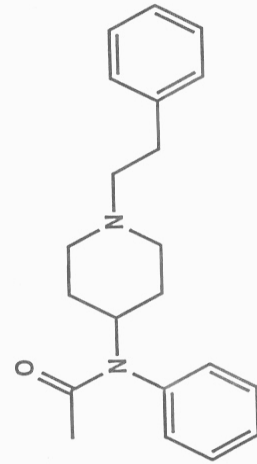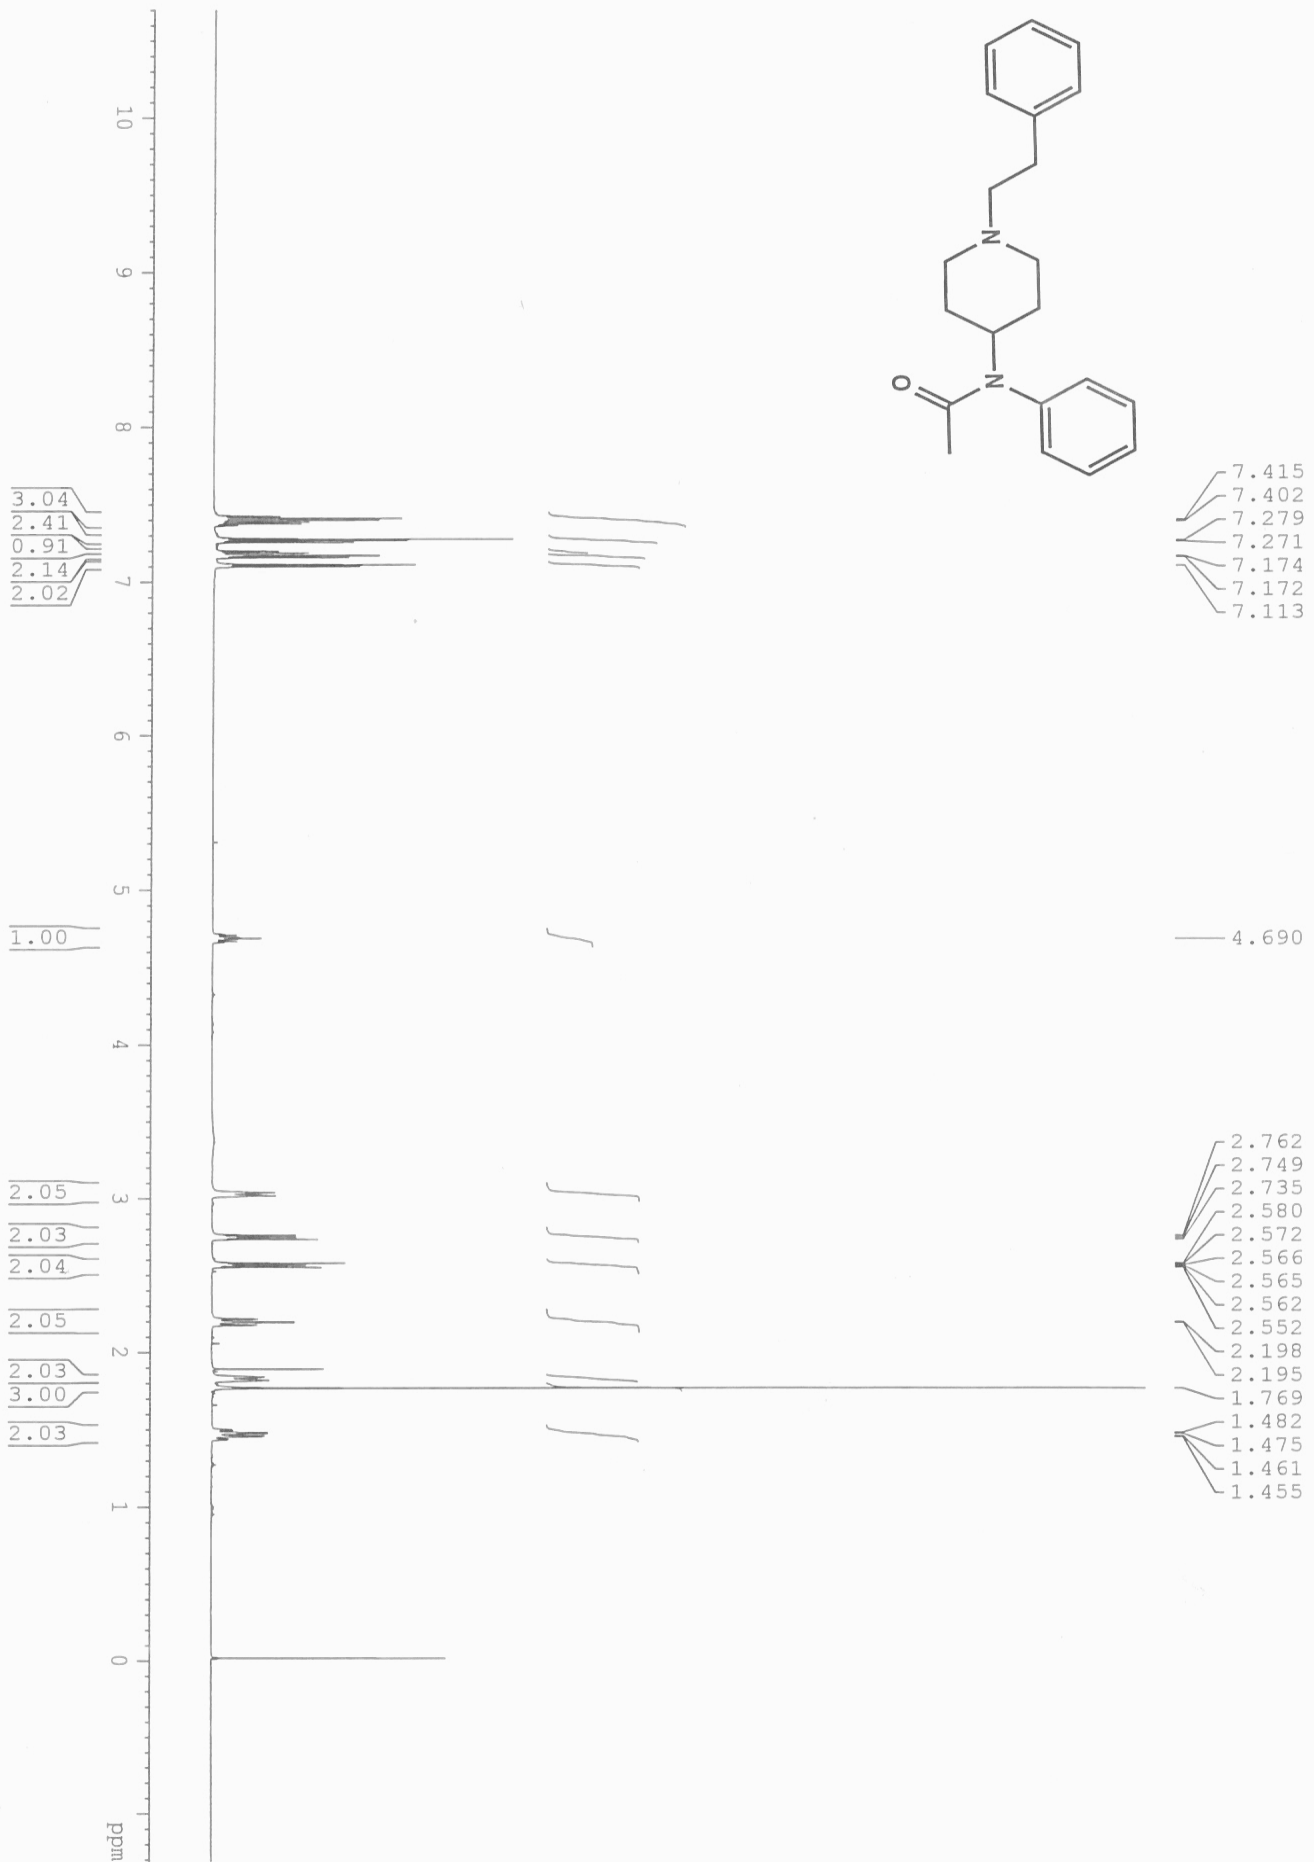



Acetyl[fentanyl] (Free base)  
CV8-144  
04/23/14

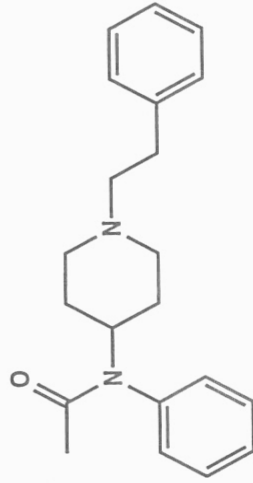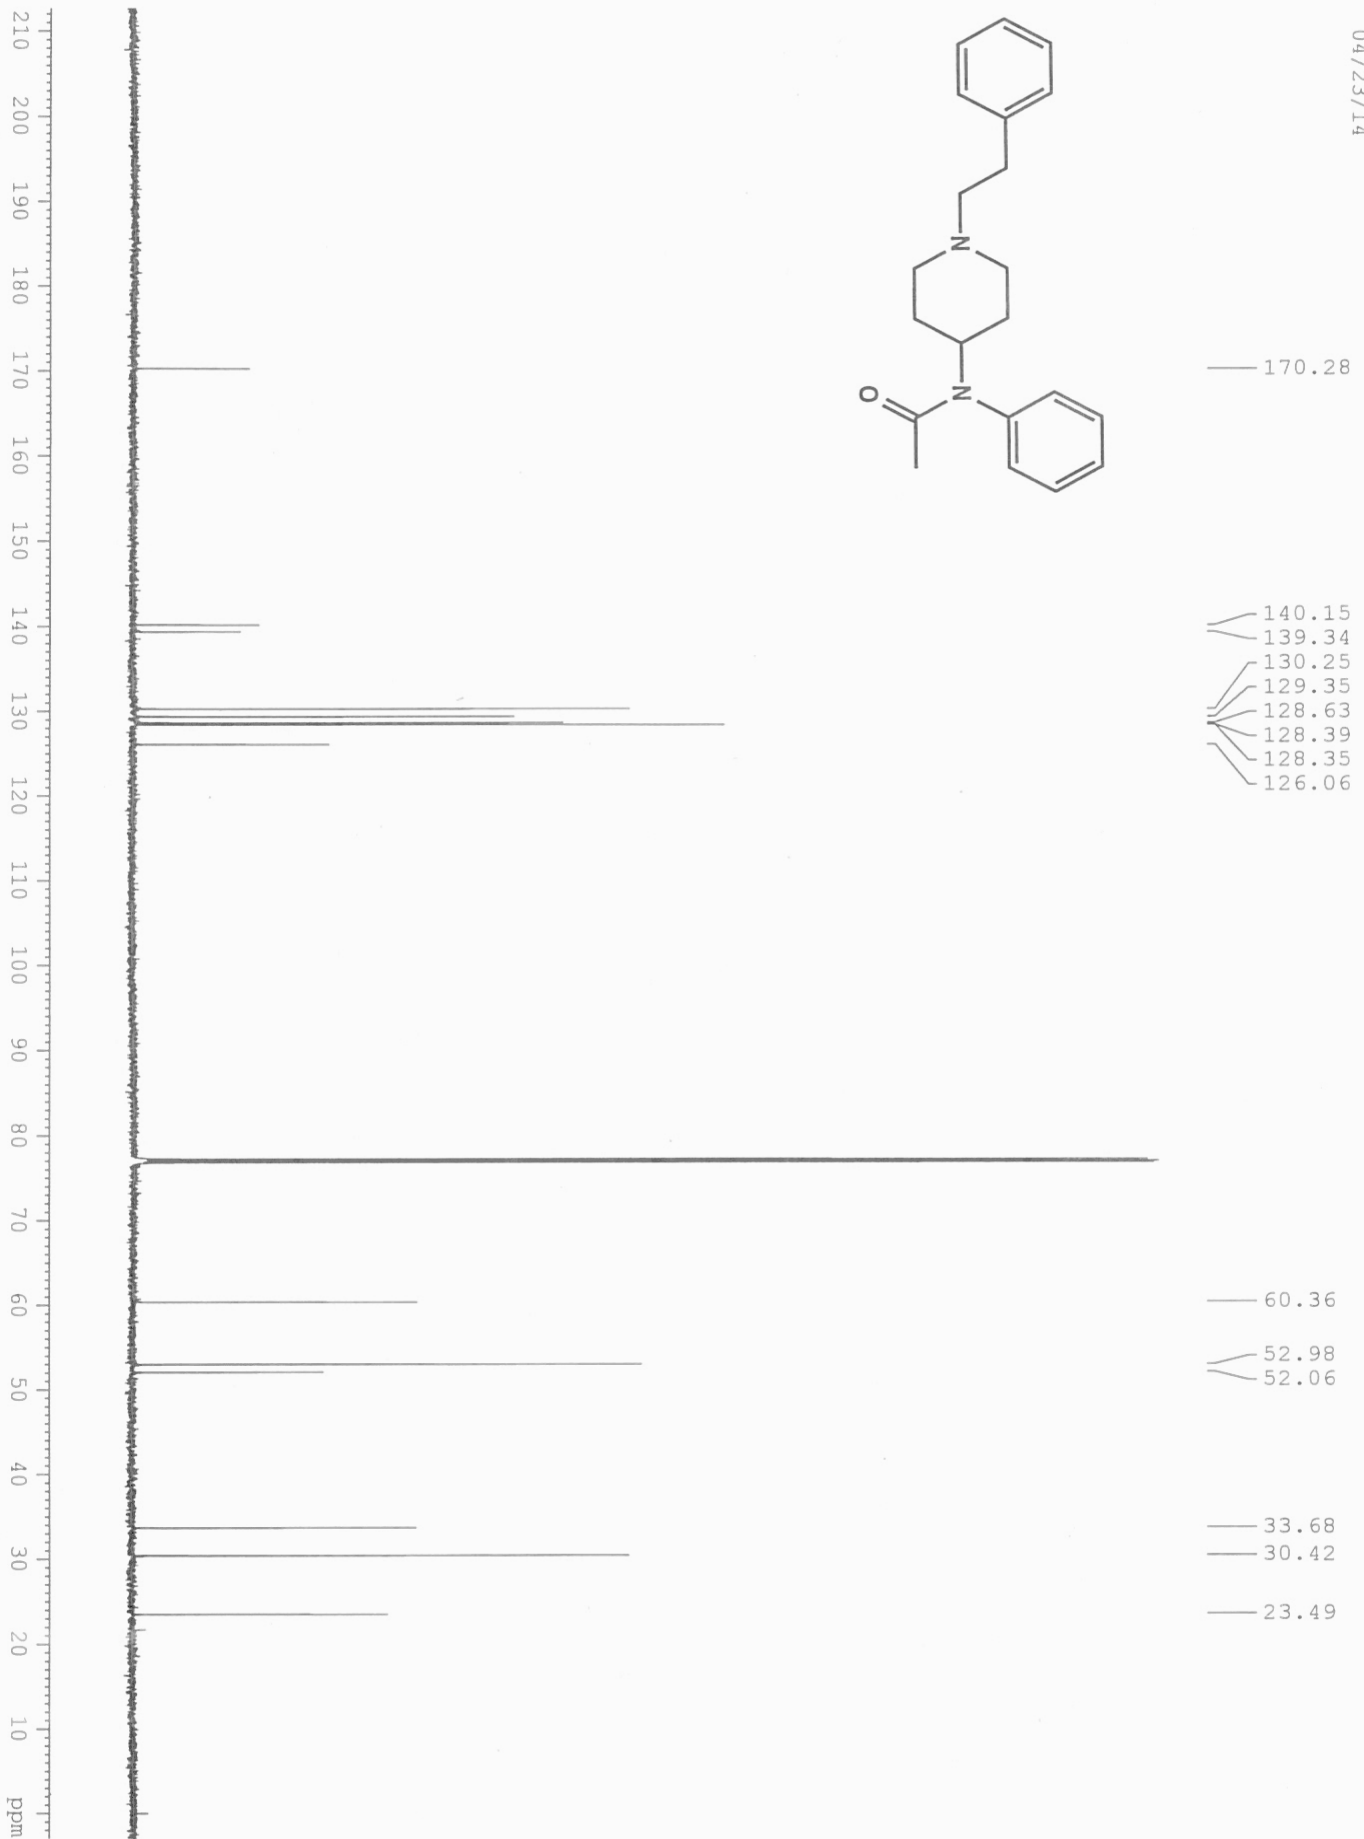

AcetylFentanyl1 (HCl salt)  
CV8-150  
04/22/14

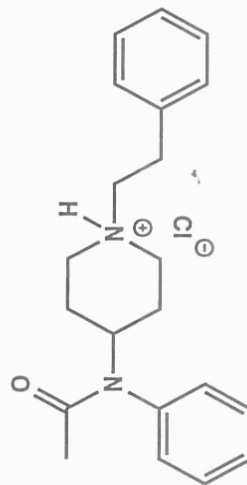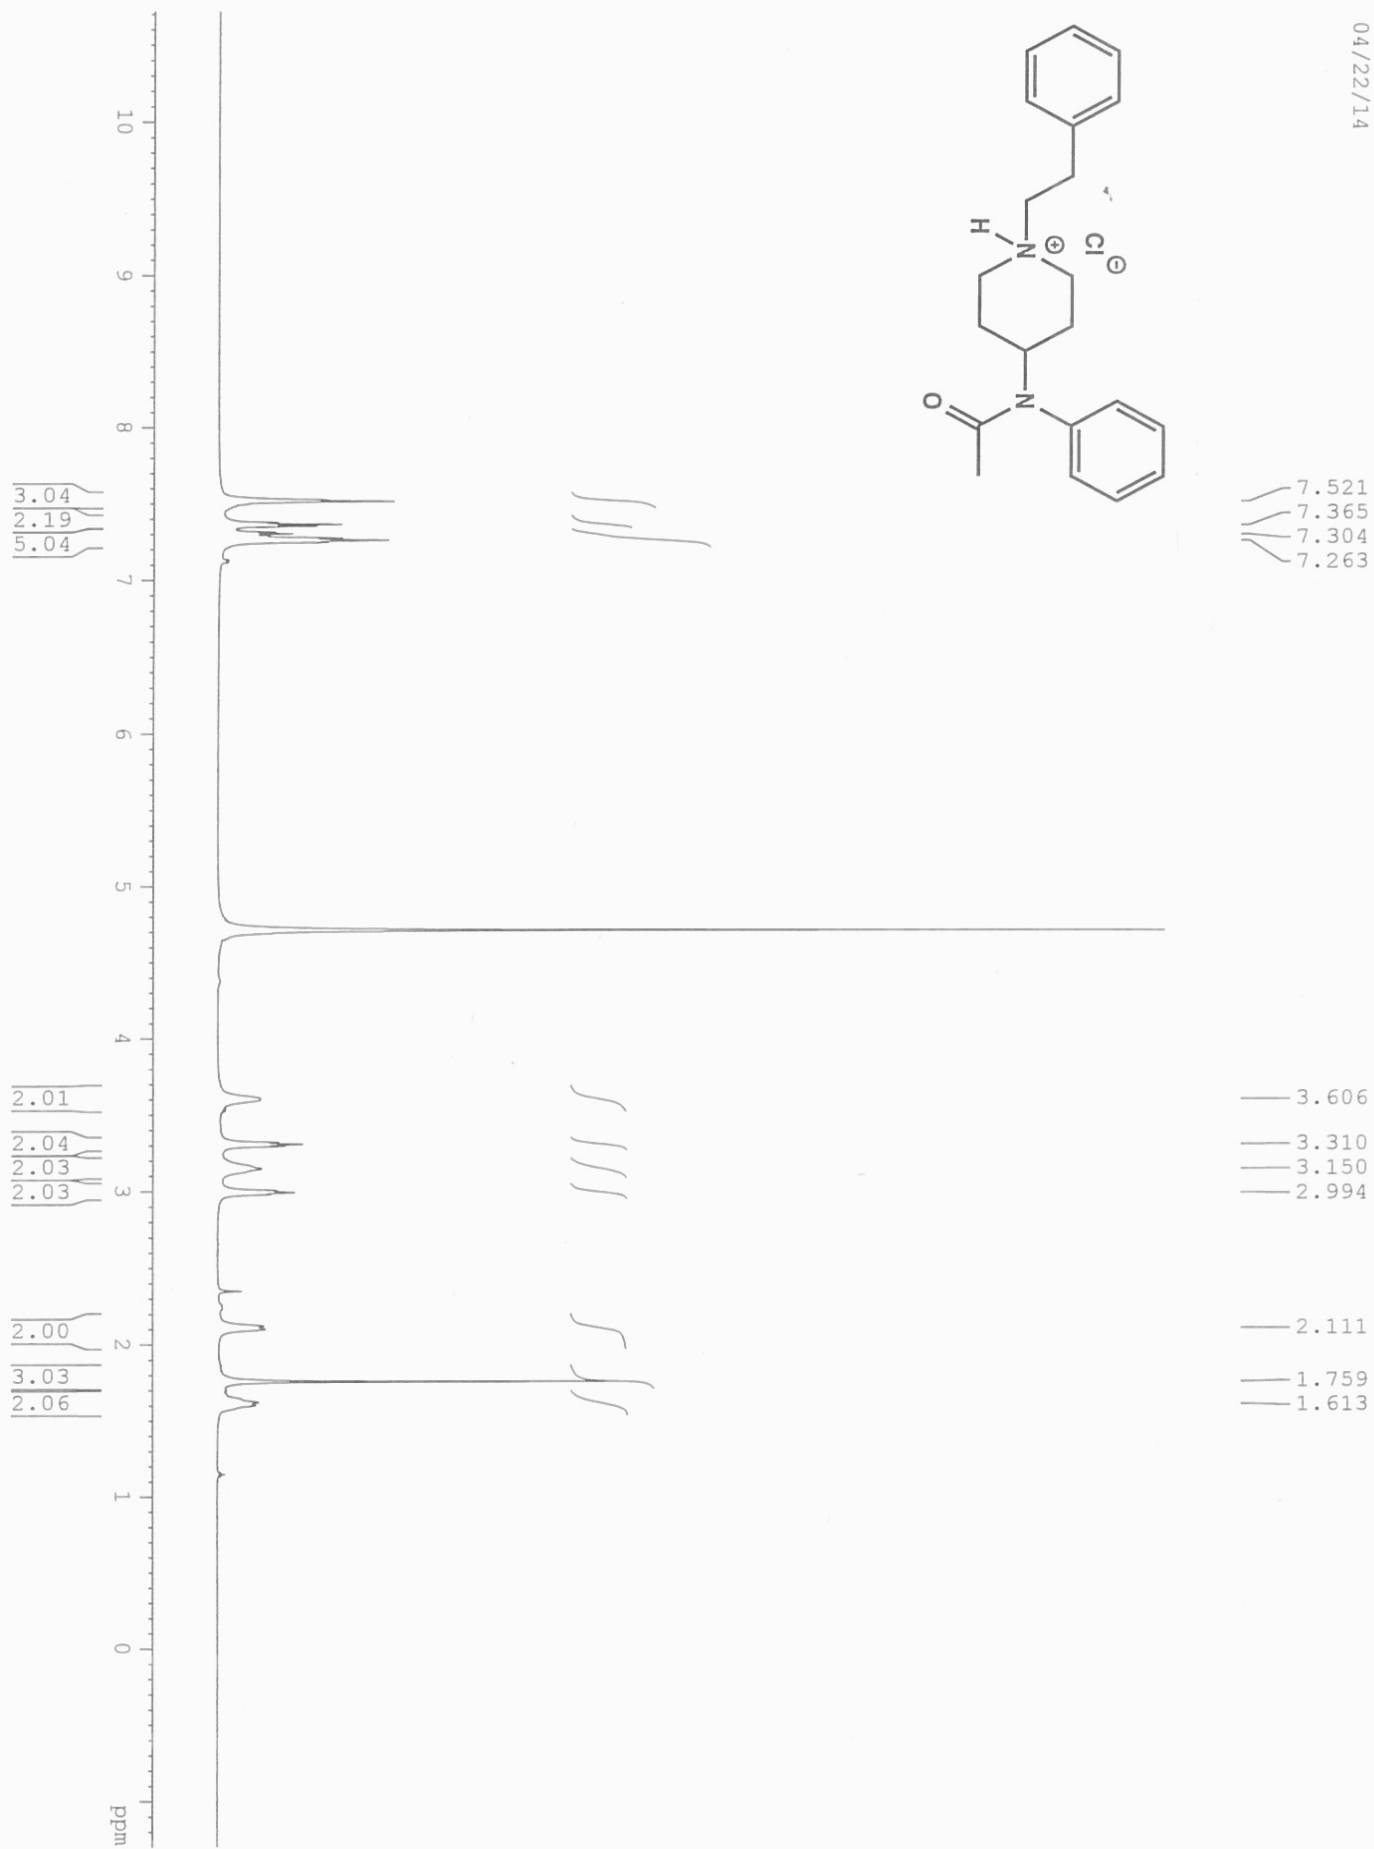

AcetylFentanyl1 (HCl salt)  
CV8-150  
04/22/14

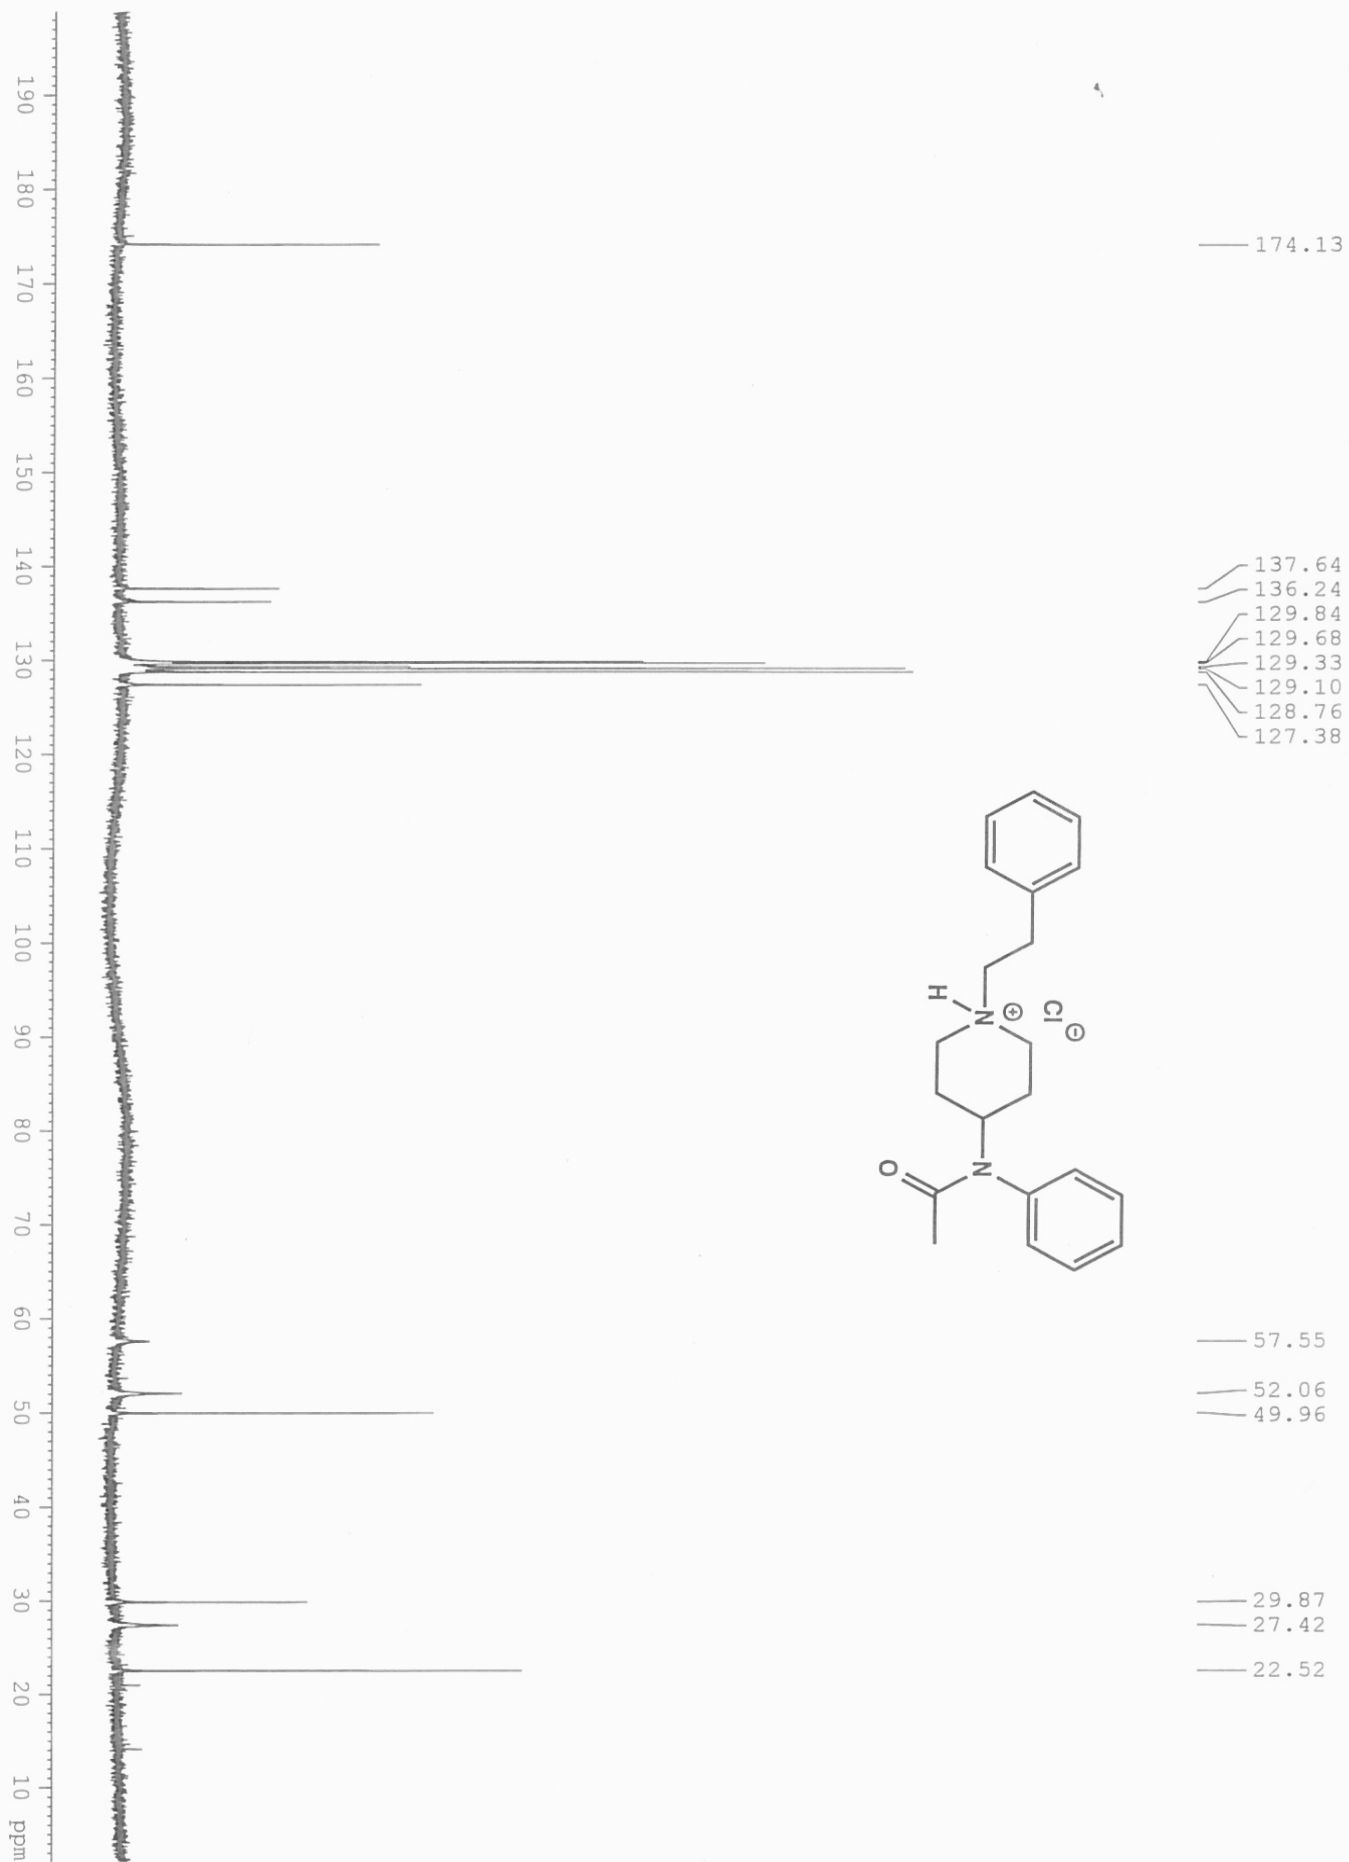

Acetyl[fentanyl] (citrate salt)  
CV8-151  
04/23/14

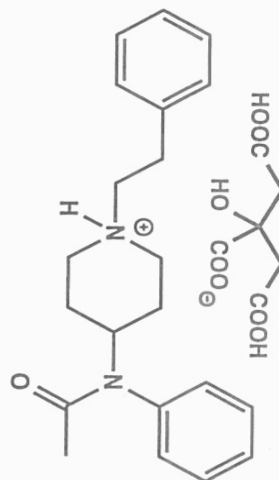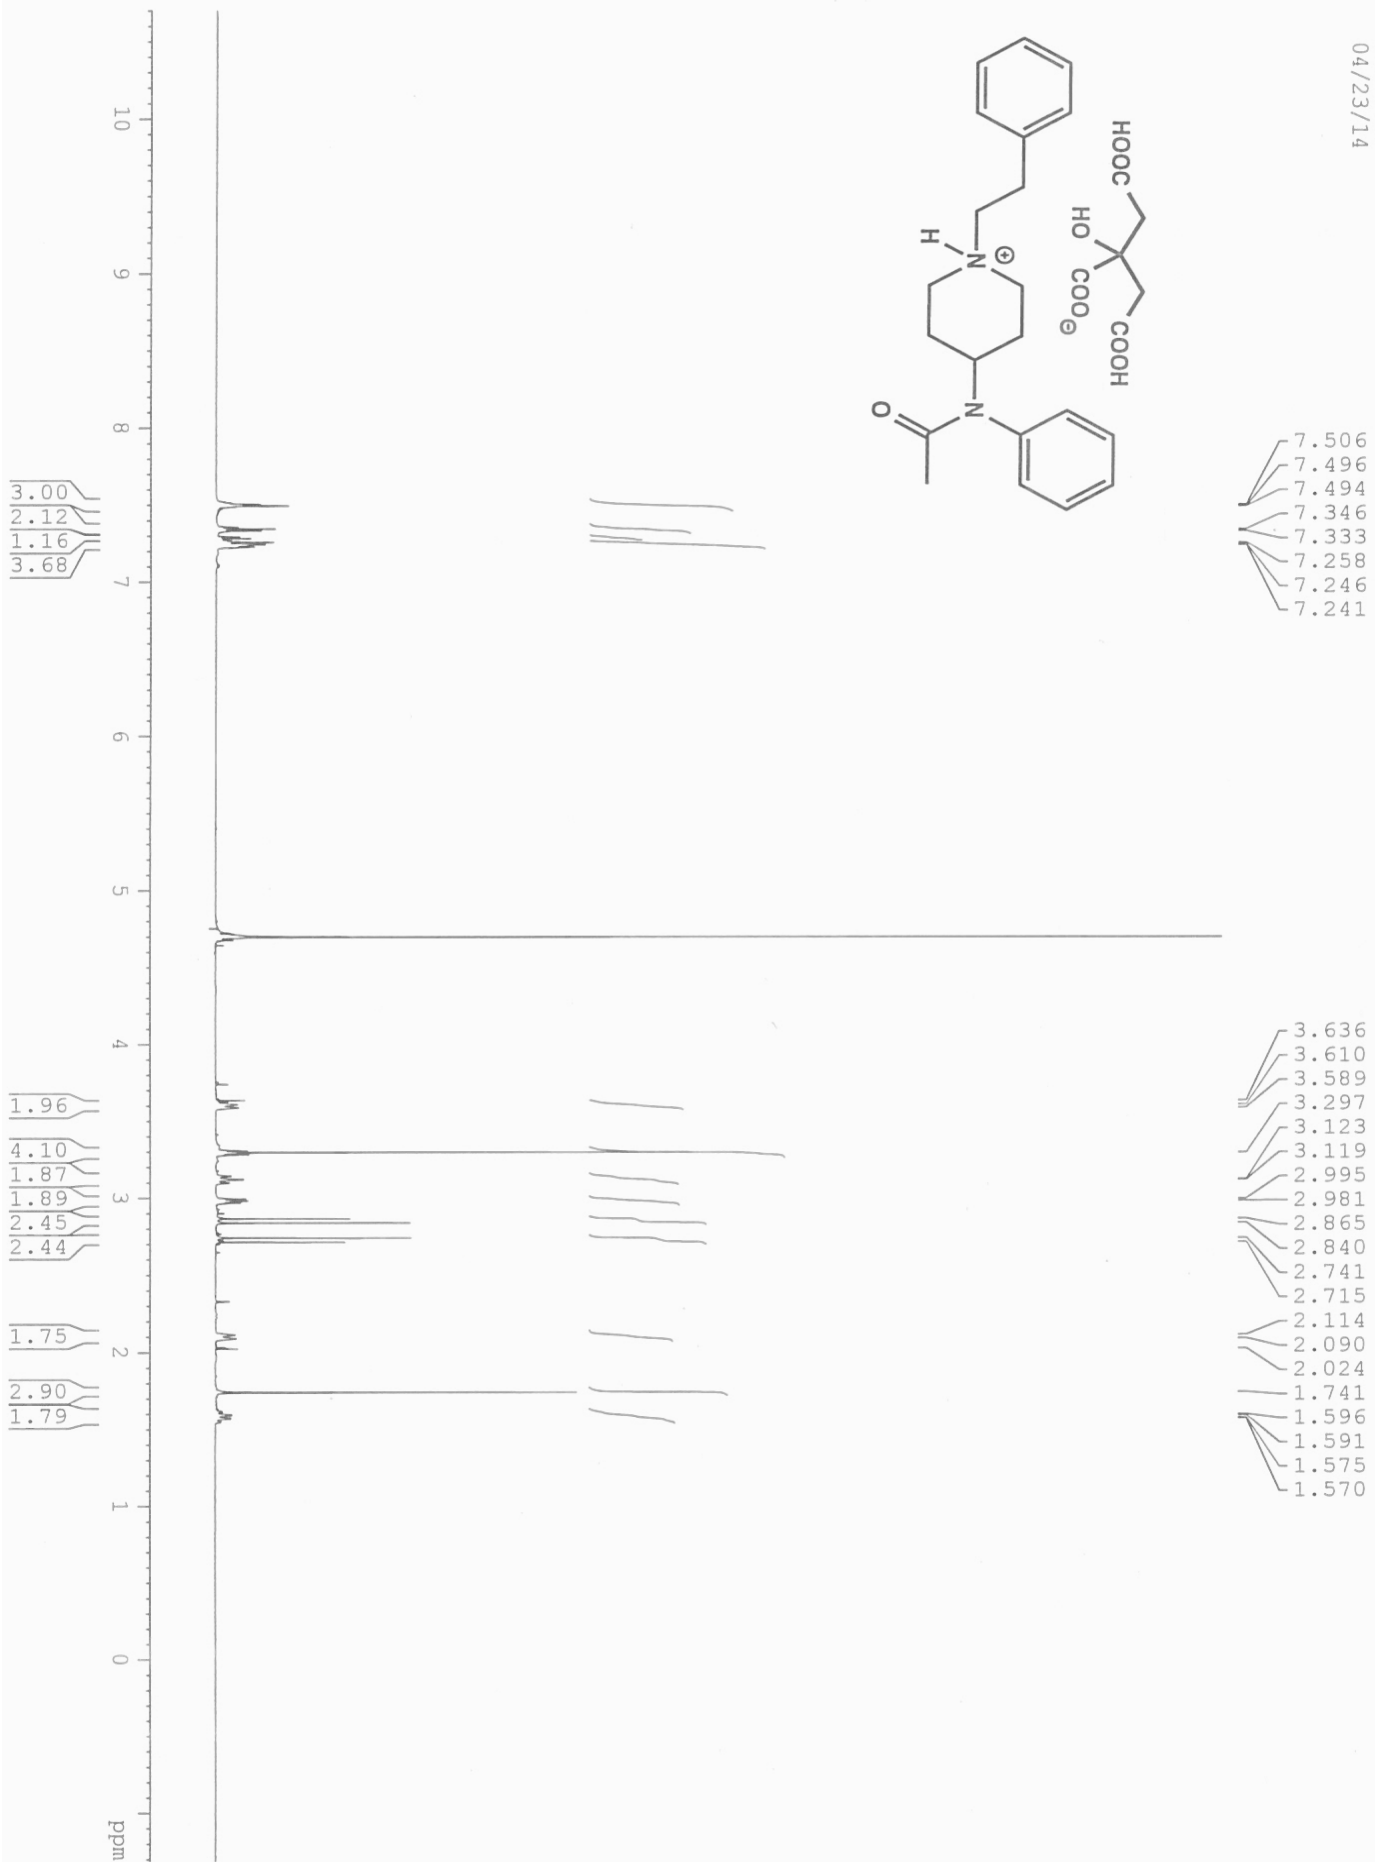

Acetylfentanyl (citrate salt)  
CV8-151  
04/23/14

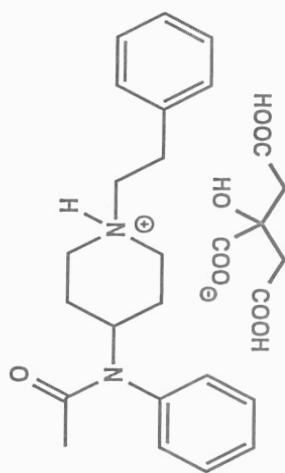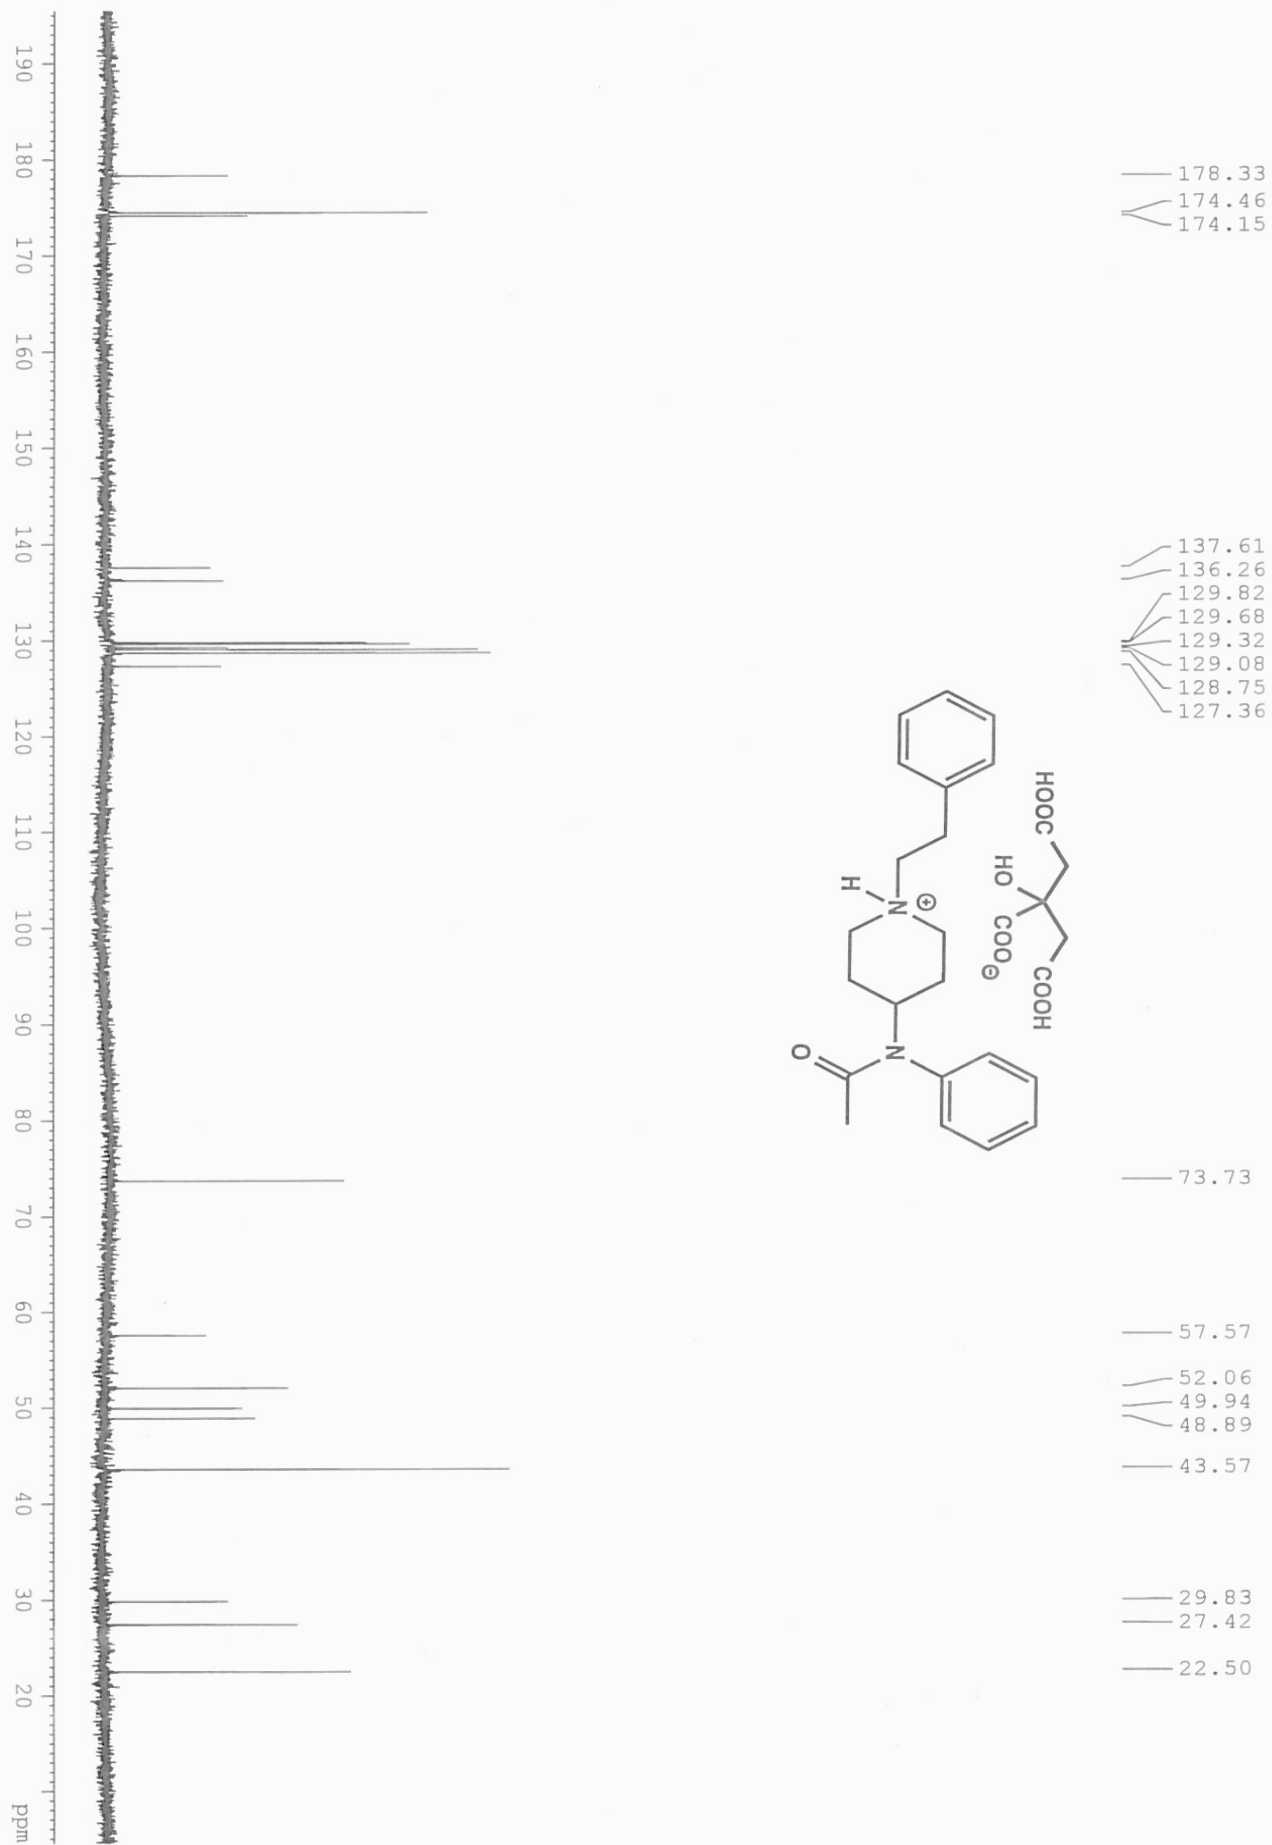

CV8-108  
Thiophene ethanol mesylate  
11-18-13

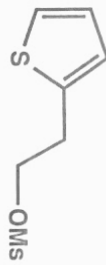

- 7.260
- 7.197
- 7.195
- 7.188
- 7.186
- 6.968
- 6.962
- 6.959
- 6.954
- 6.914
- 6.912
- 6.908
- 6.907

- 4.427
- 4.416
- 4.405

- 3.284
- 3.283
- 3.273
- 3.271
- 3.261
- 3.260
- 2.921

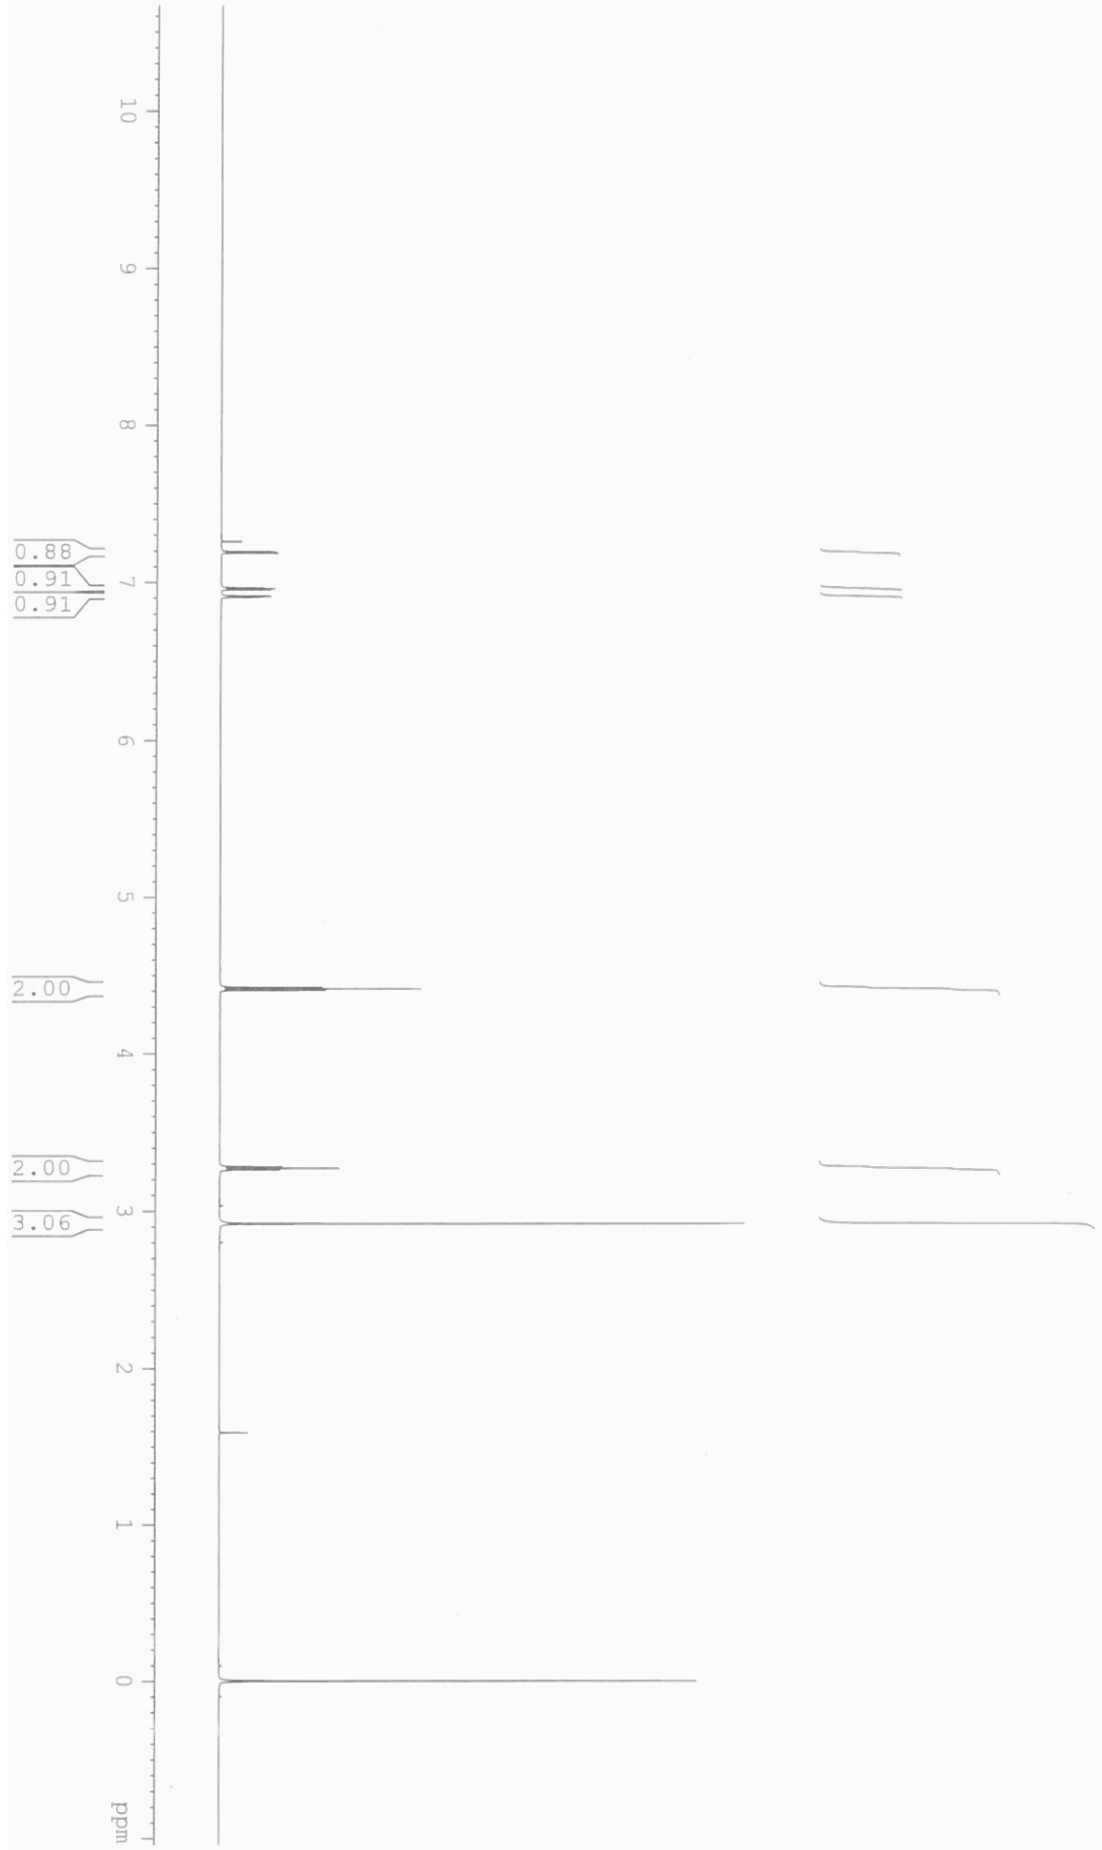

CV8-108  
Thiophene ethanol mesylate  
11-18-13

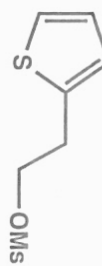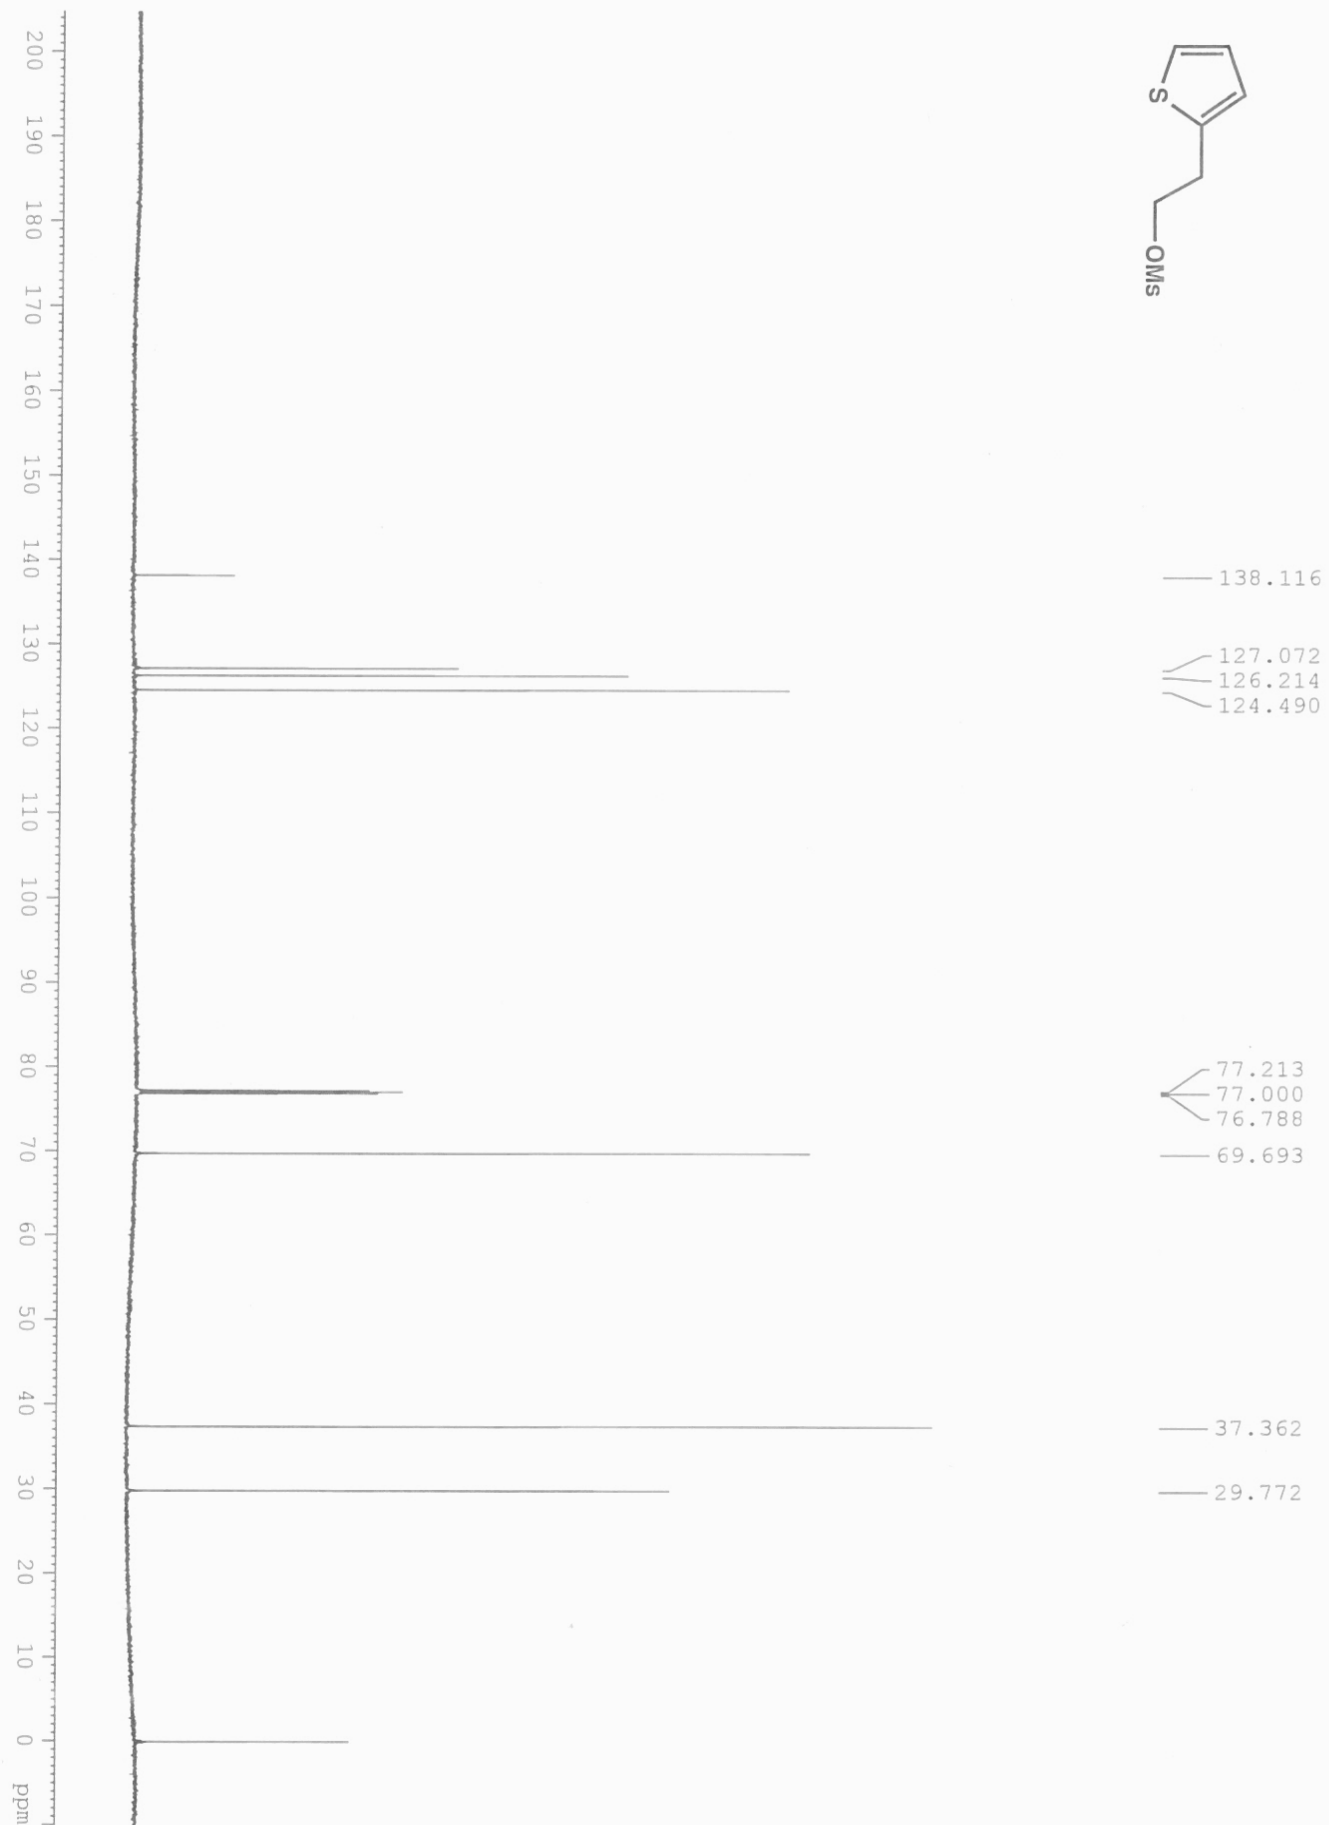

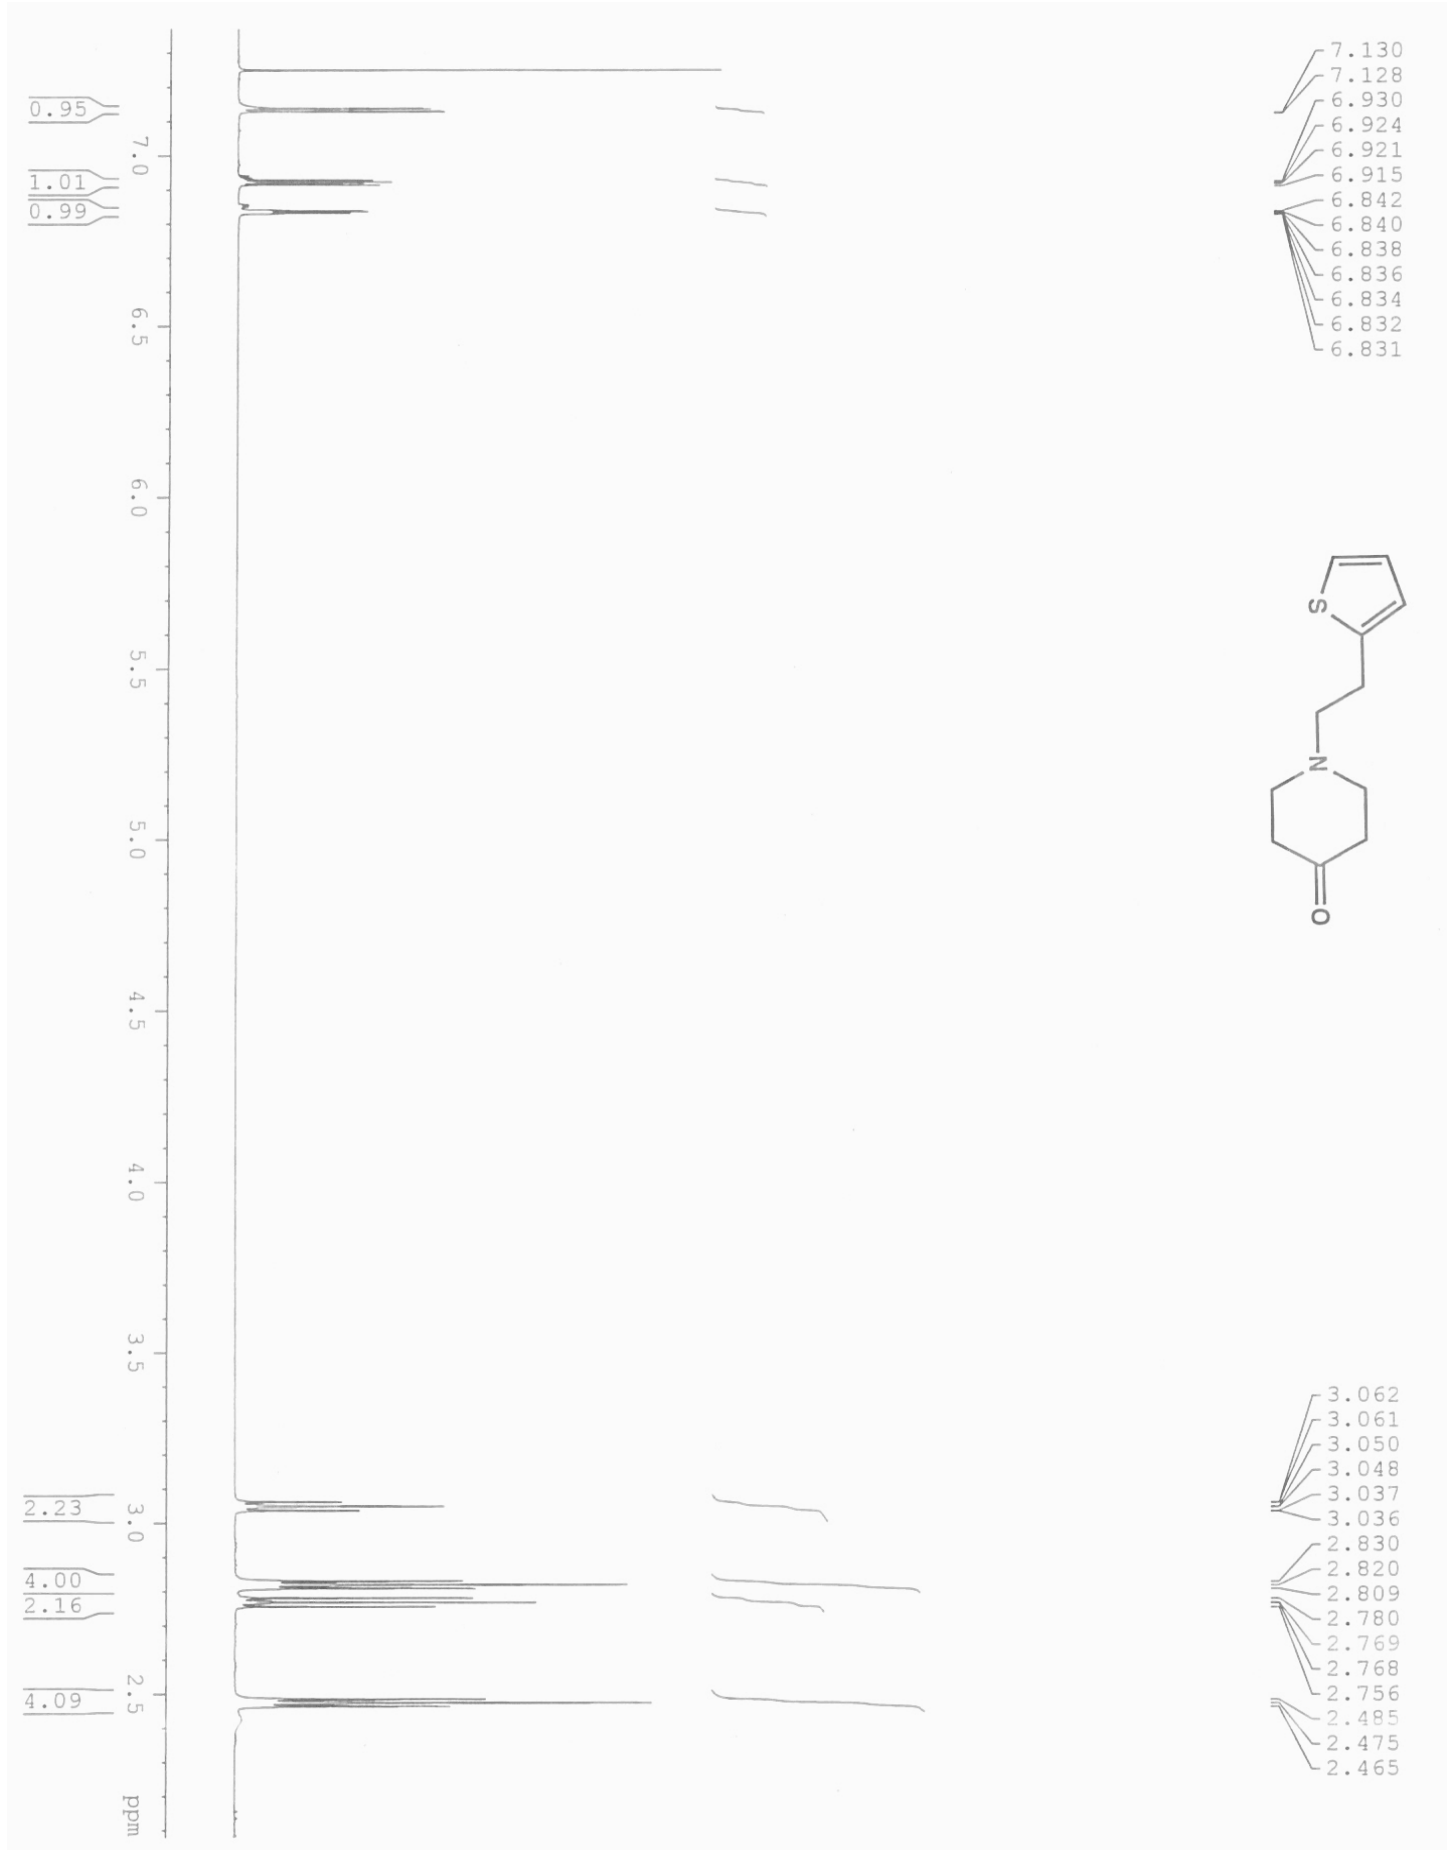



210  
200  
190  
180  
170  
160  
150  
140  
130  
120  
110  
100  
90  
80  
70  
60  
50  
40  
30  
20  
10  
0  
ppm

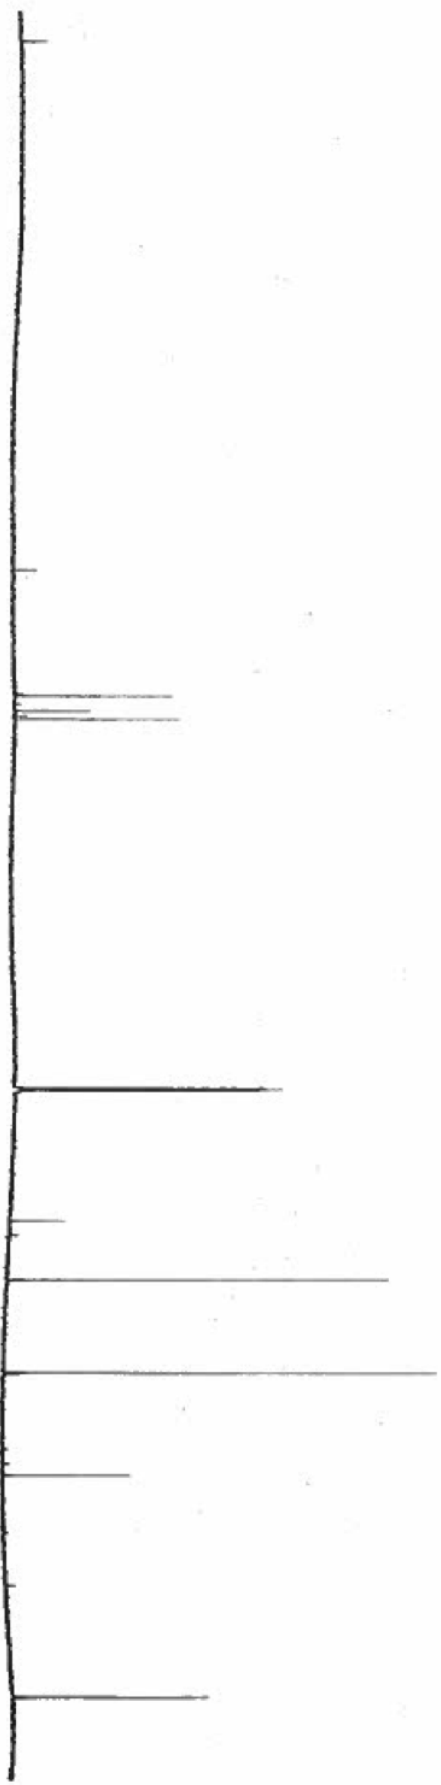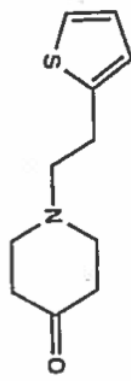

— 209.005

— 142.442

— 126.609  
— 124.745  
— 123.705

— 77.239  
— 77.026  
— 76.816

— 60.386

— 53.005

— 41.263

— 28.306

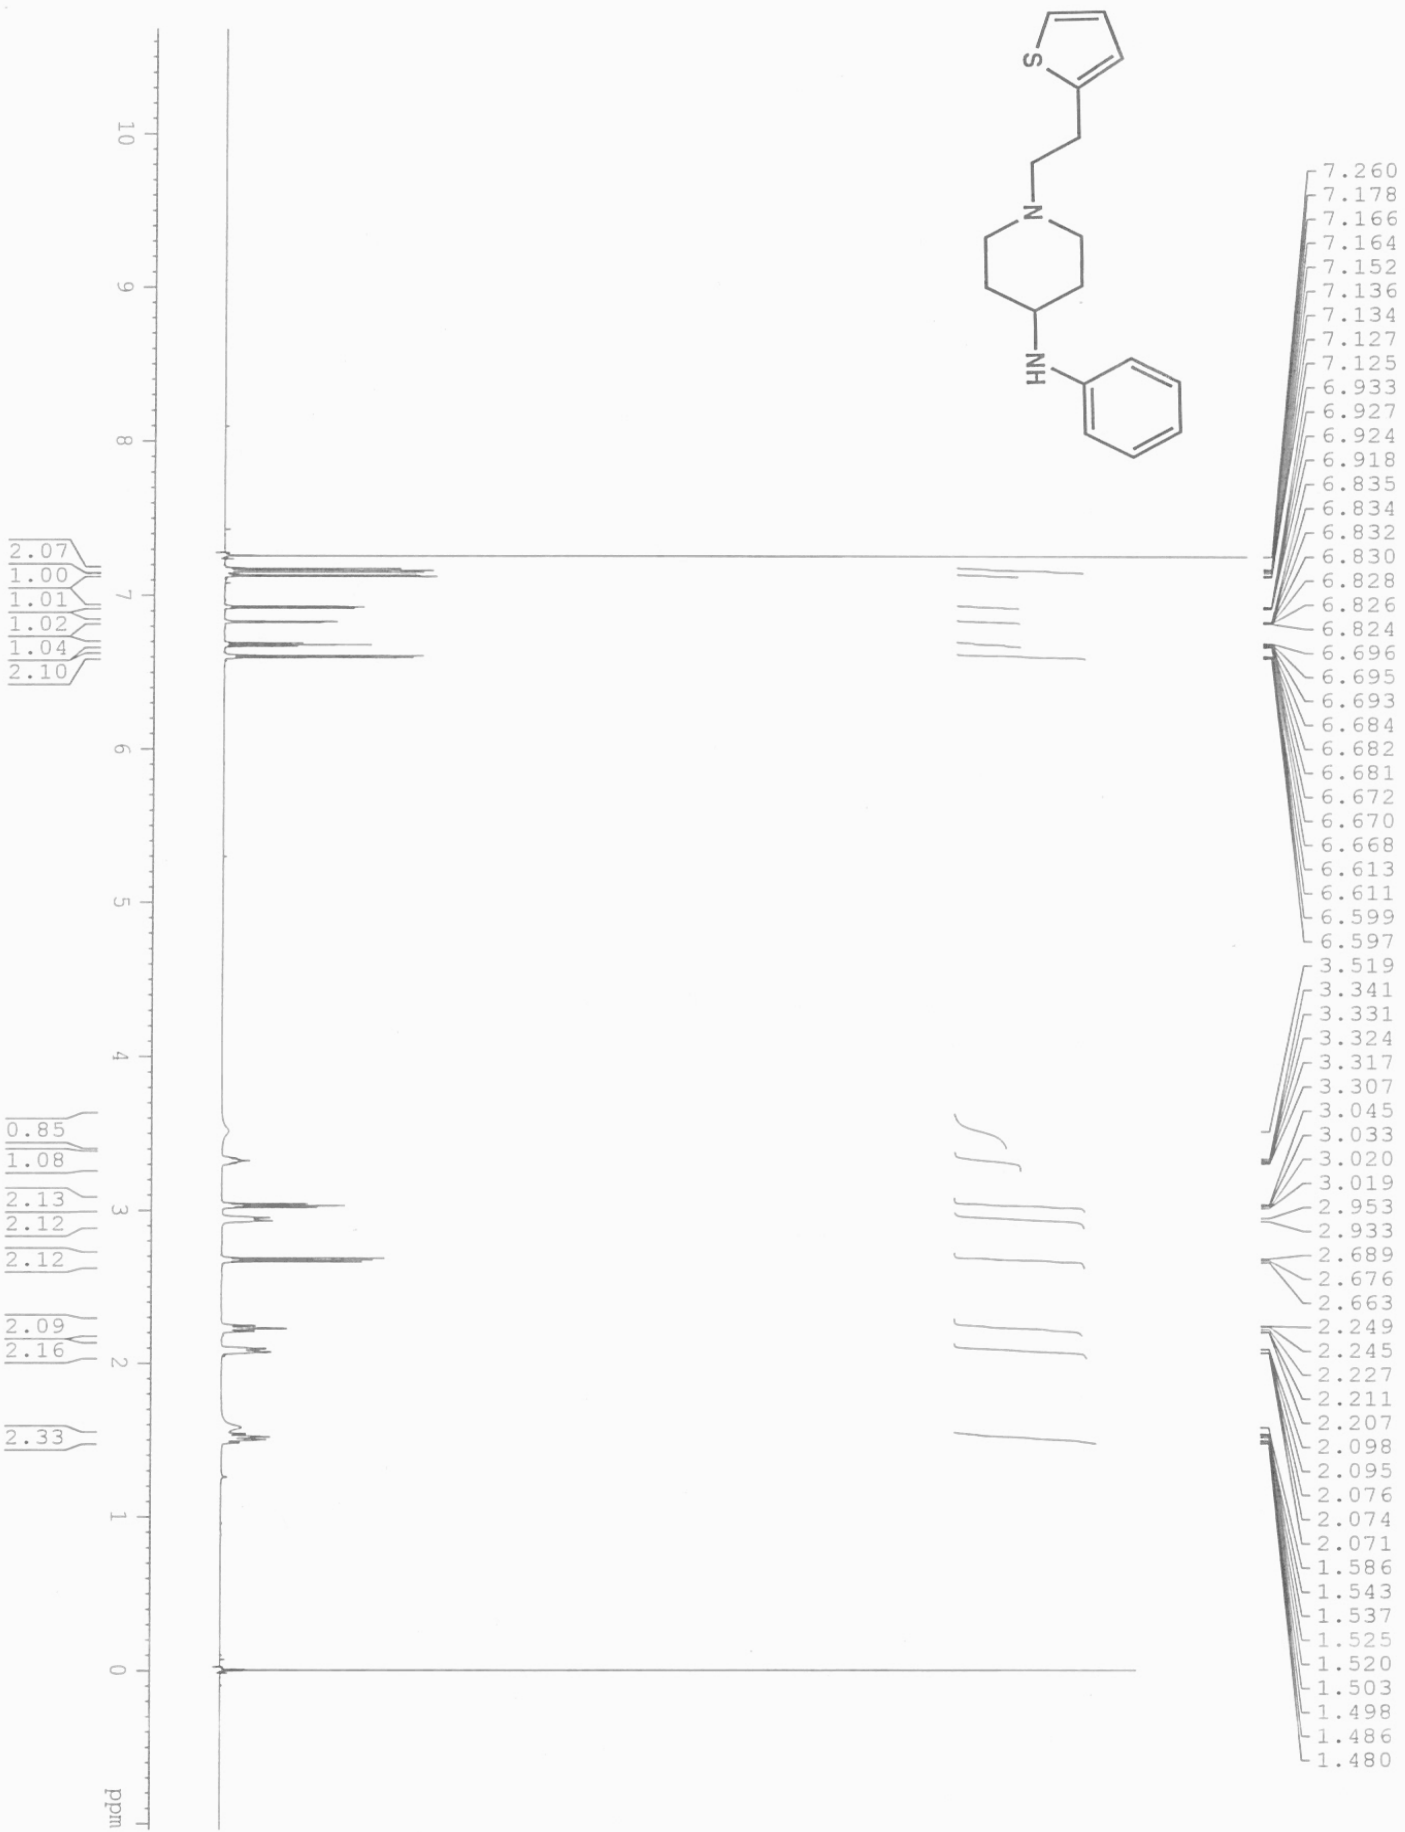

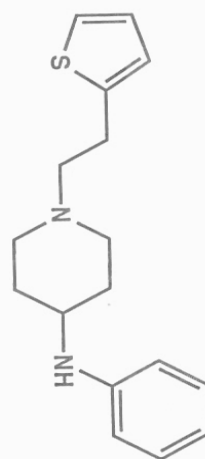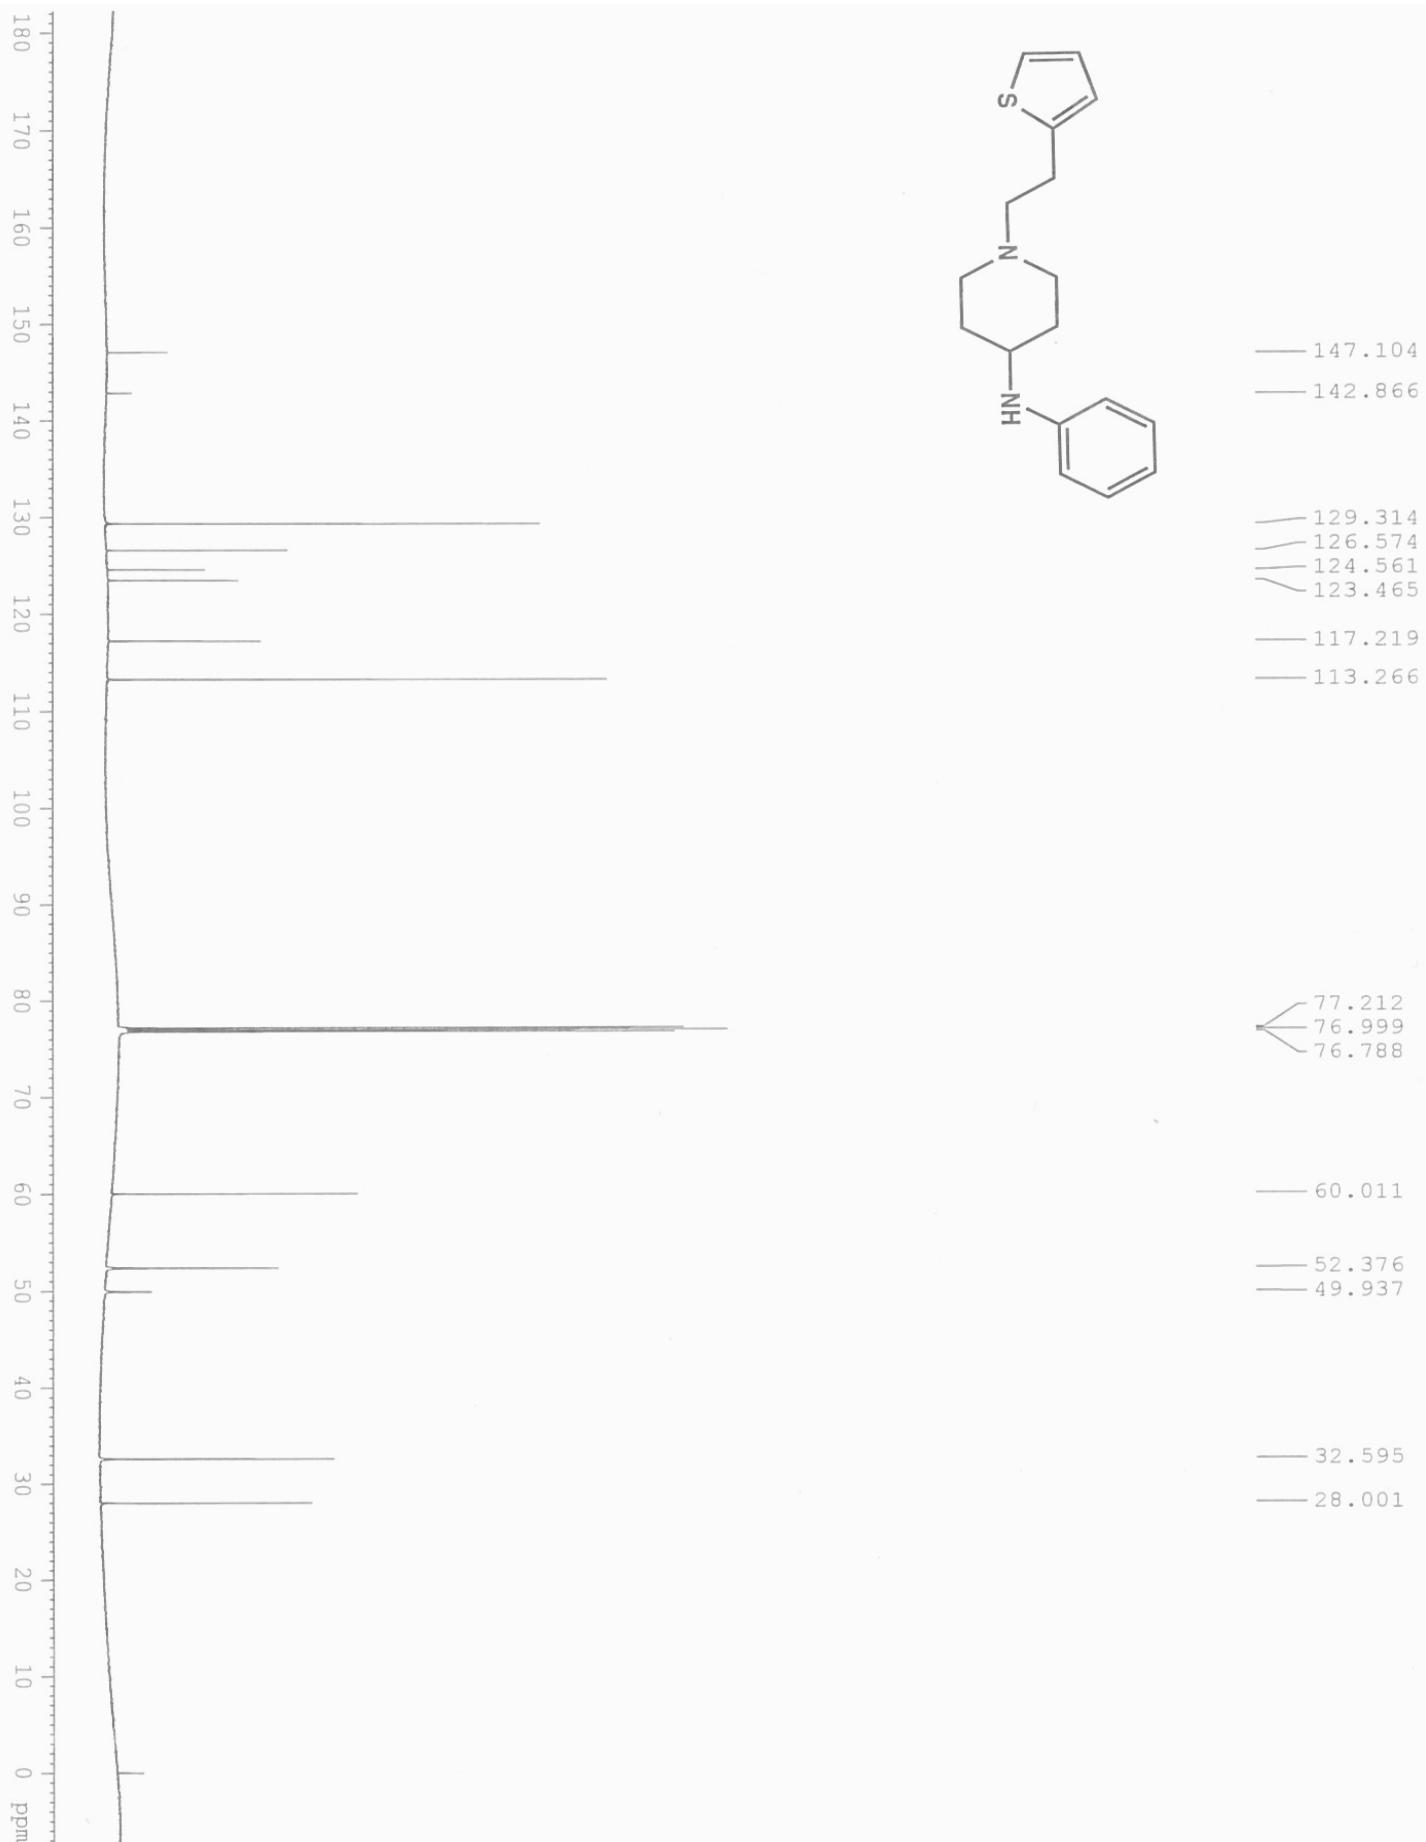

CV8-102  
 Thioencanyl (free base)  
 3-7-14

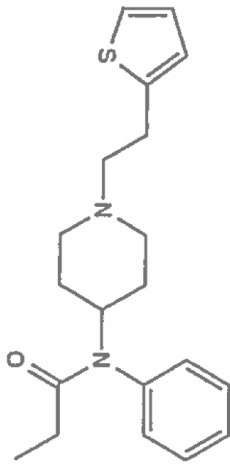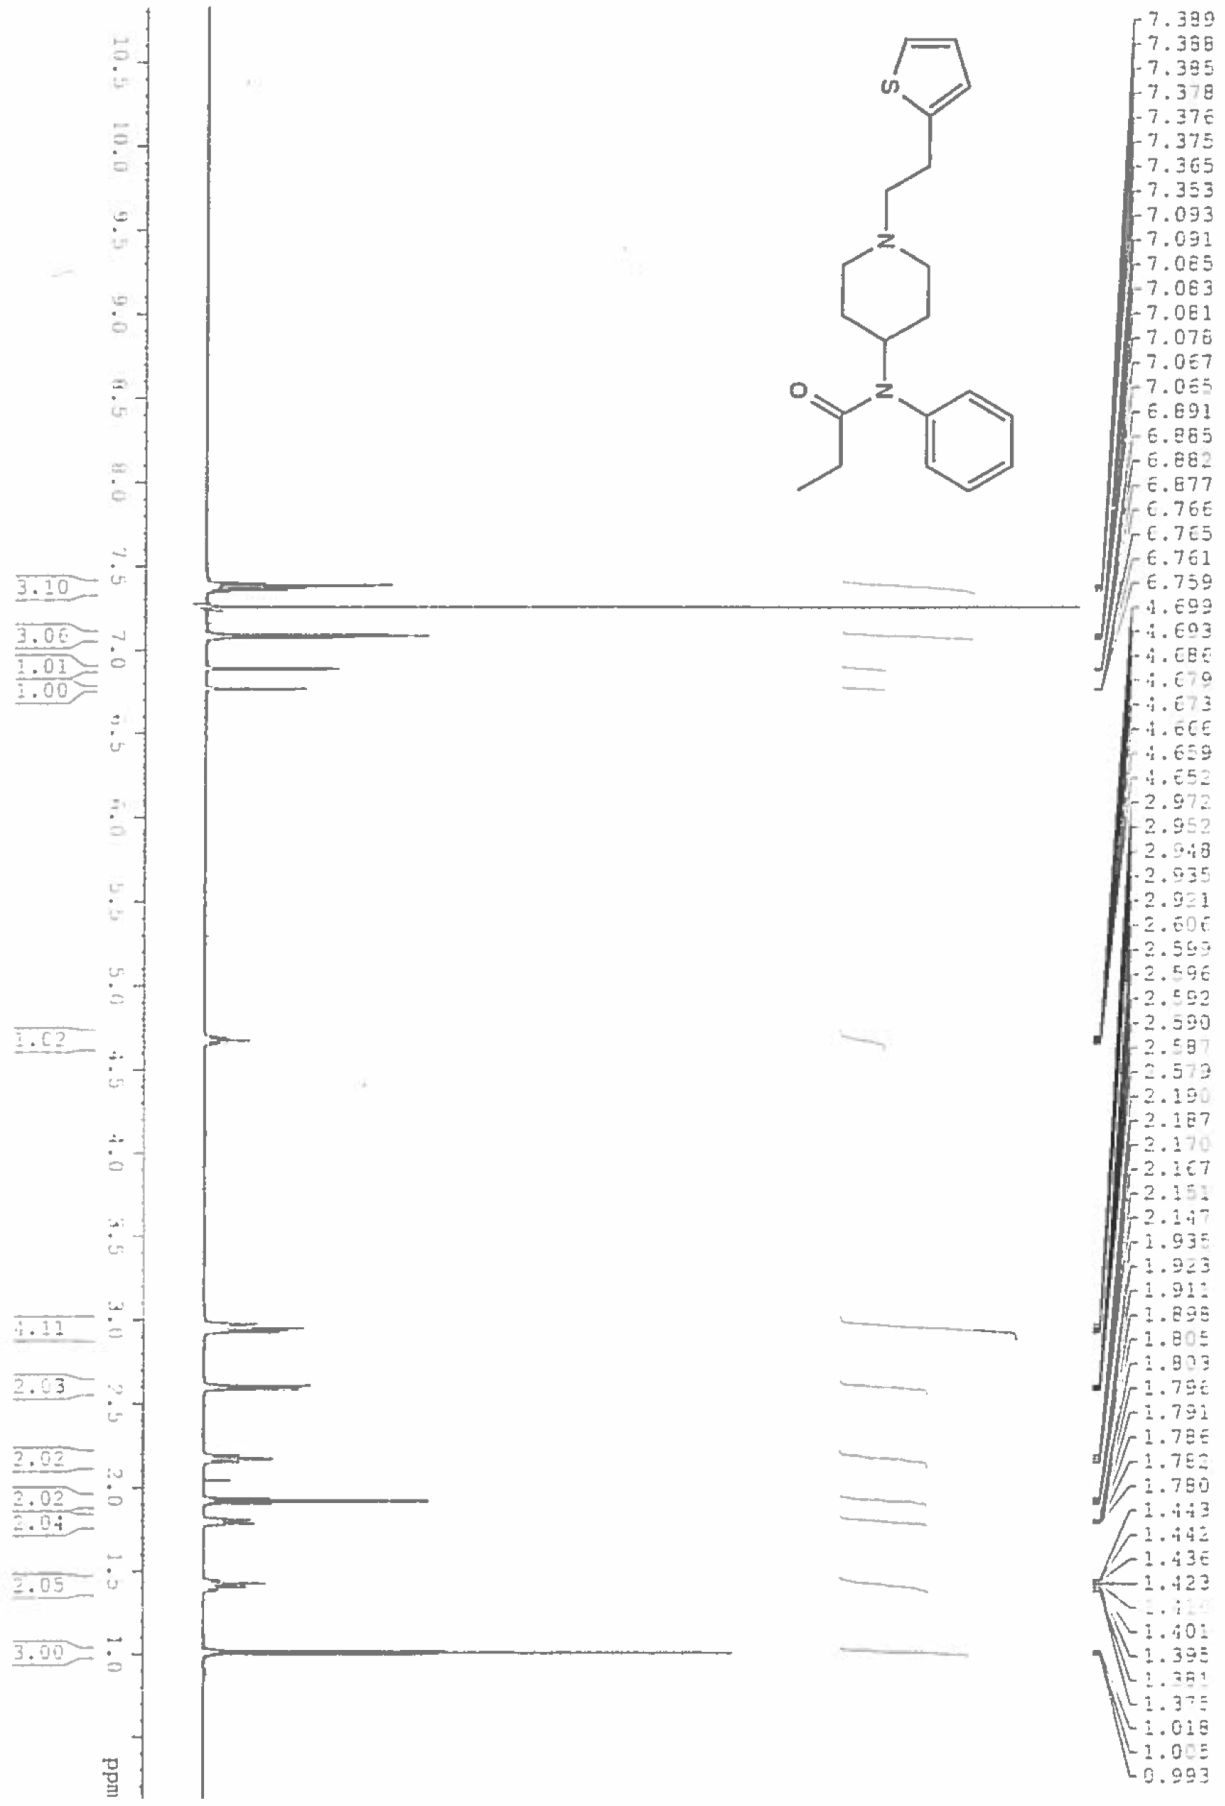

CV8-162  
Thiofentanyl (Free base)  
3-7-14

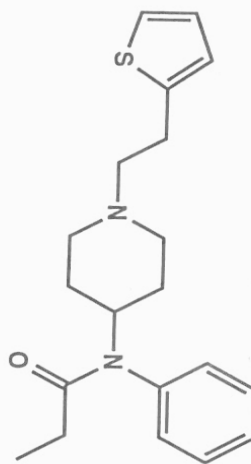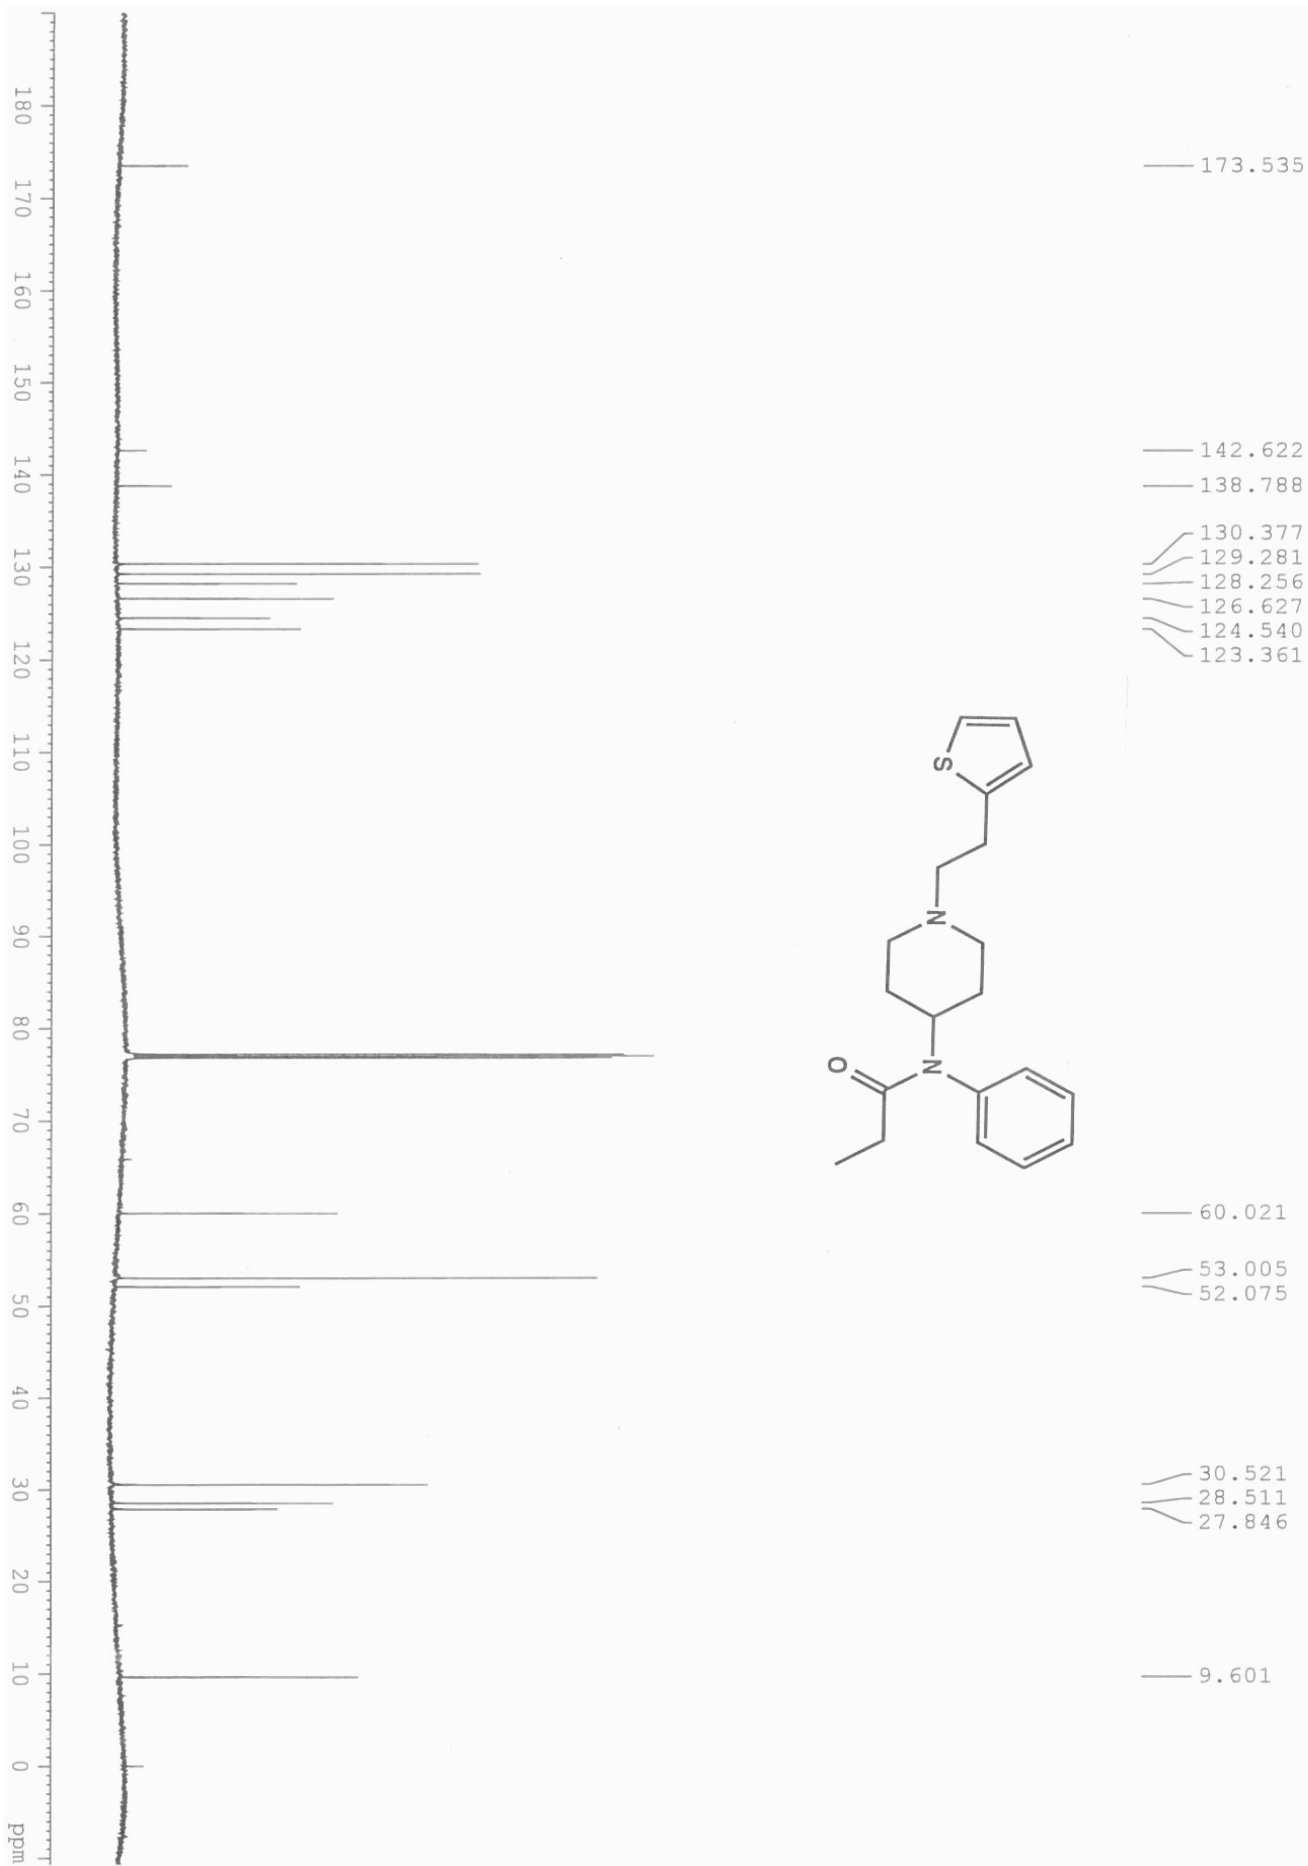

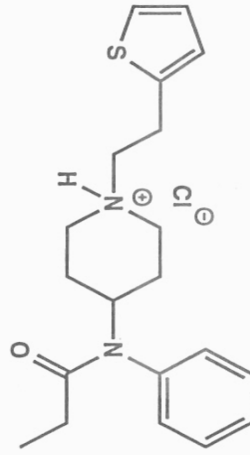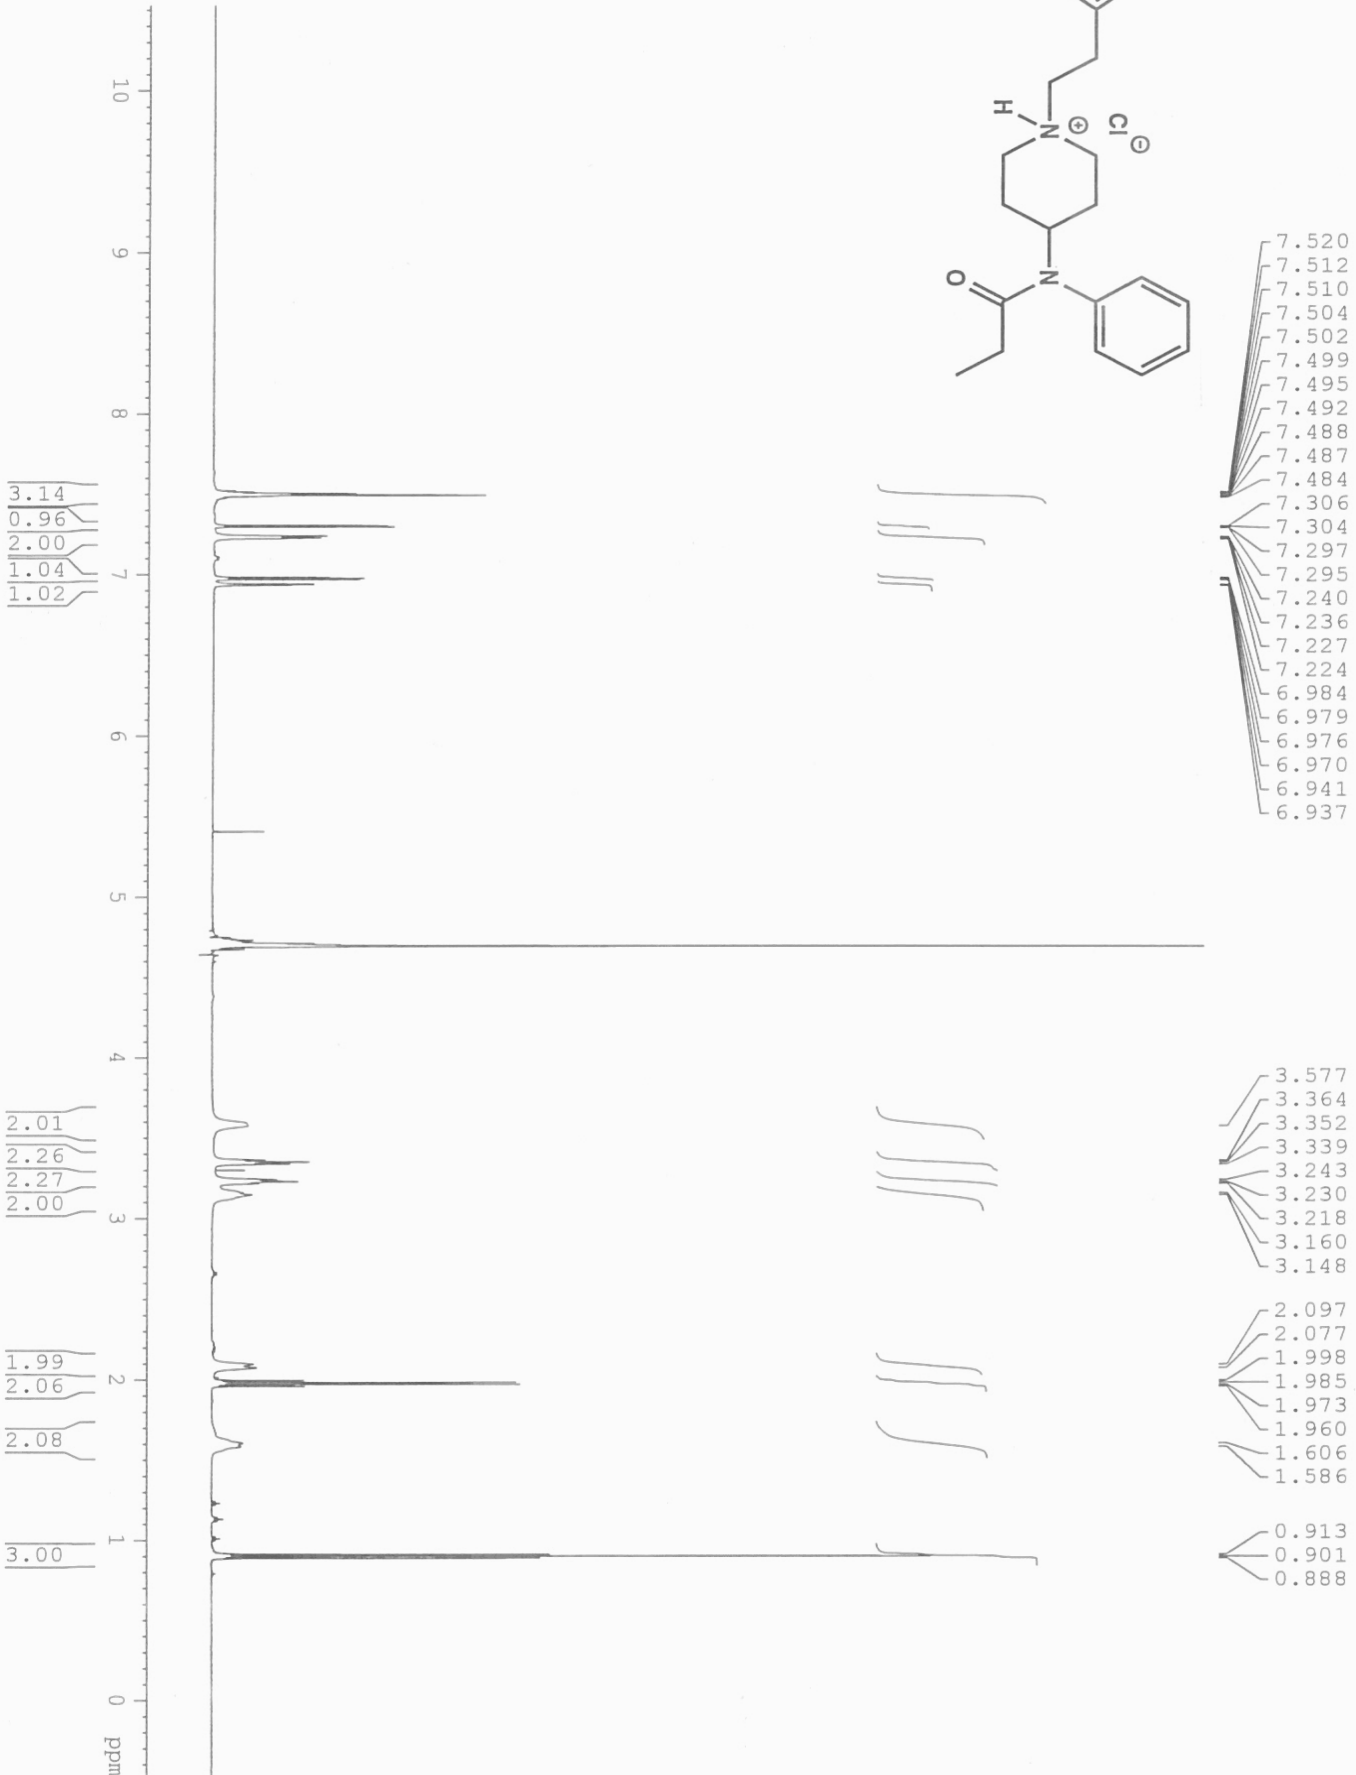

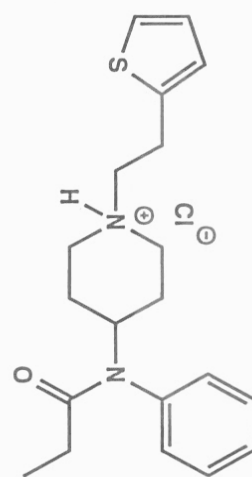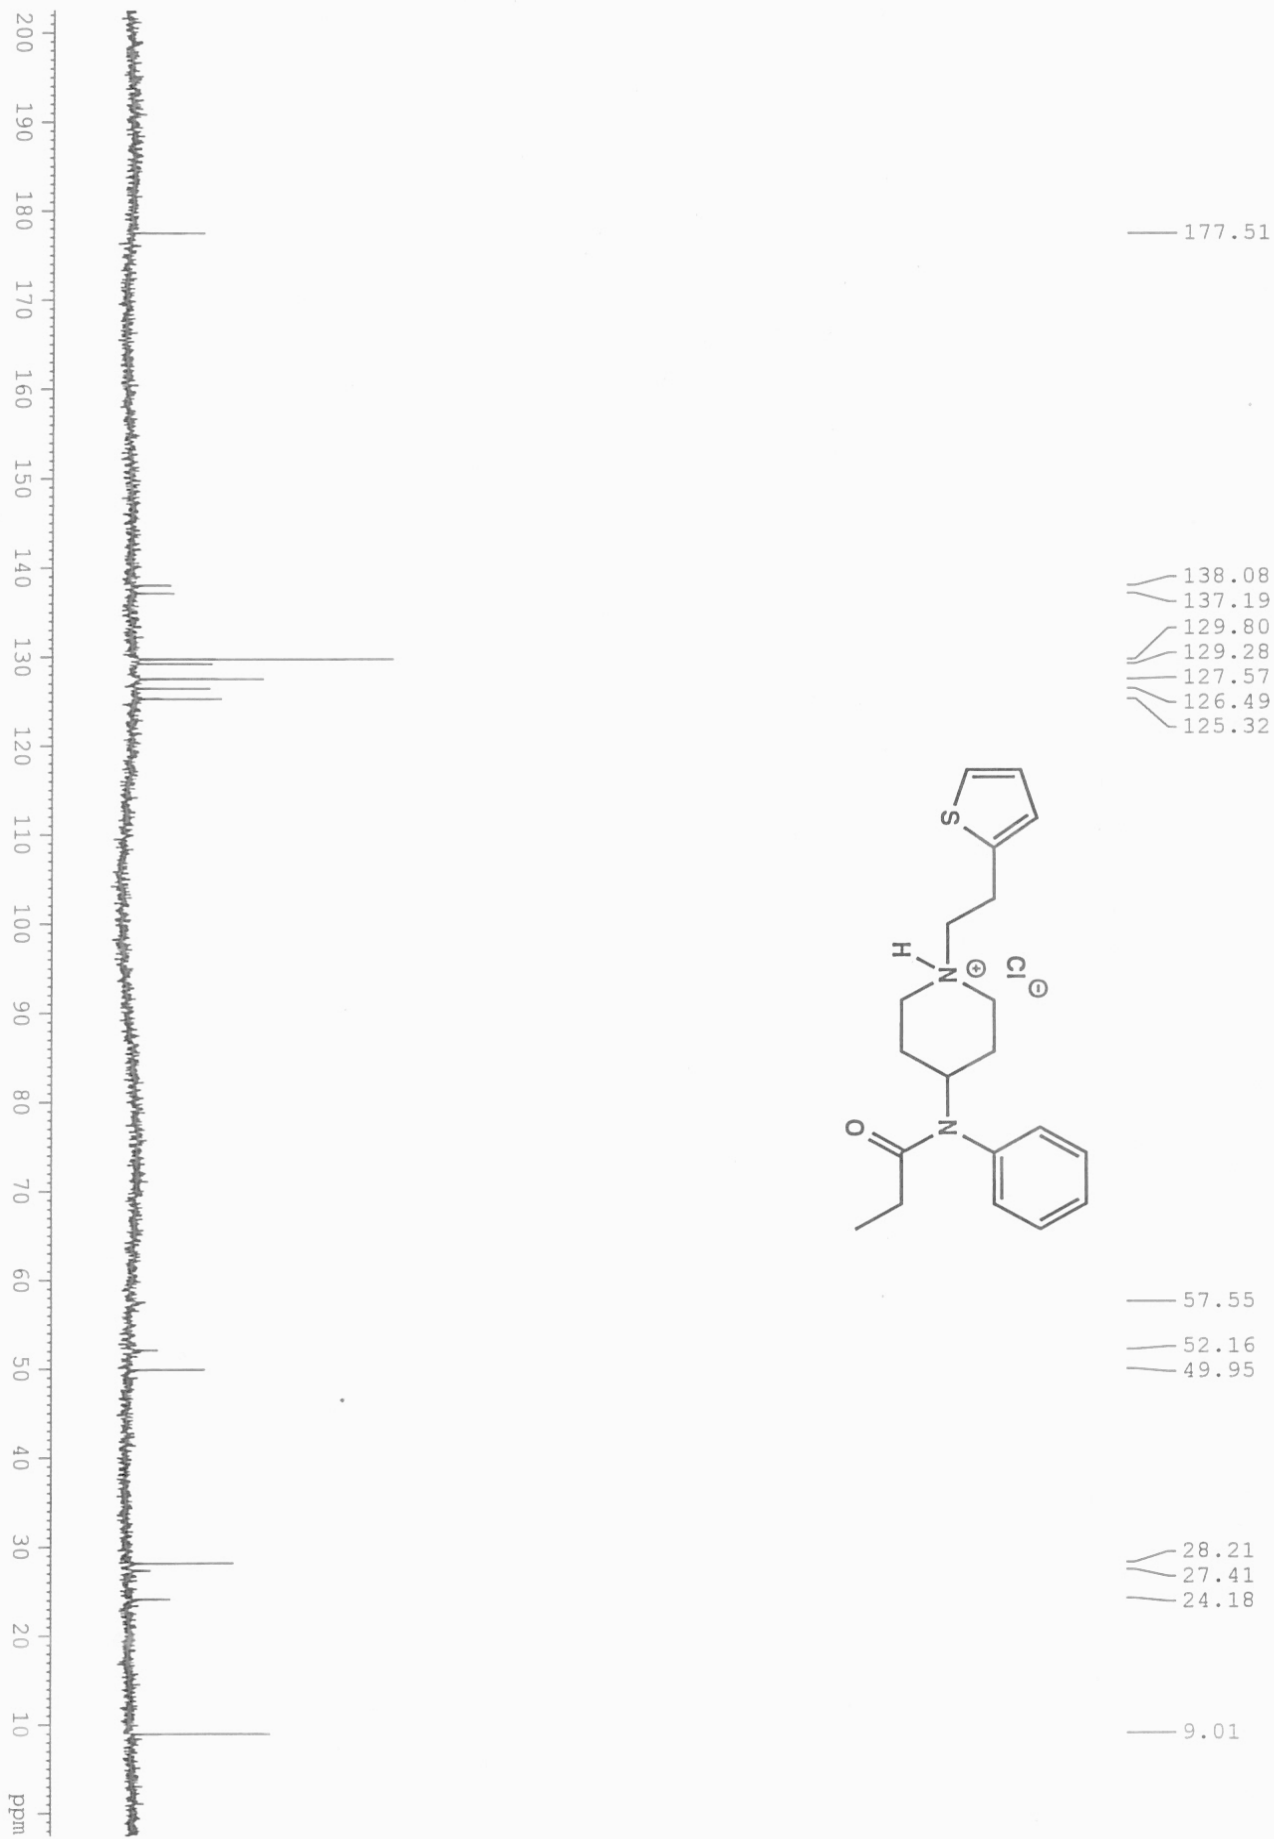

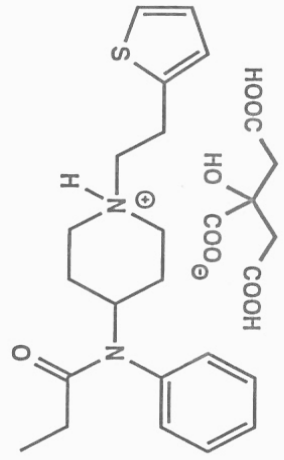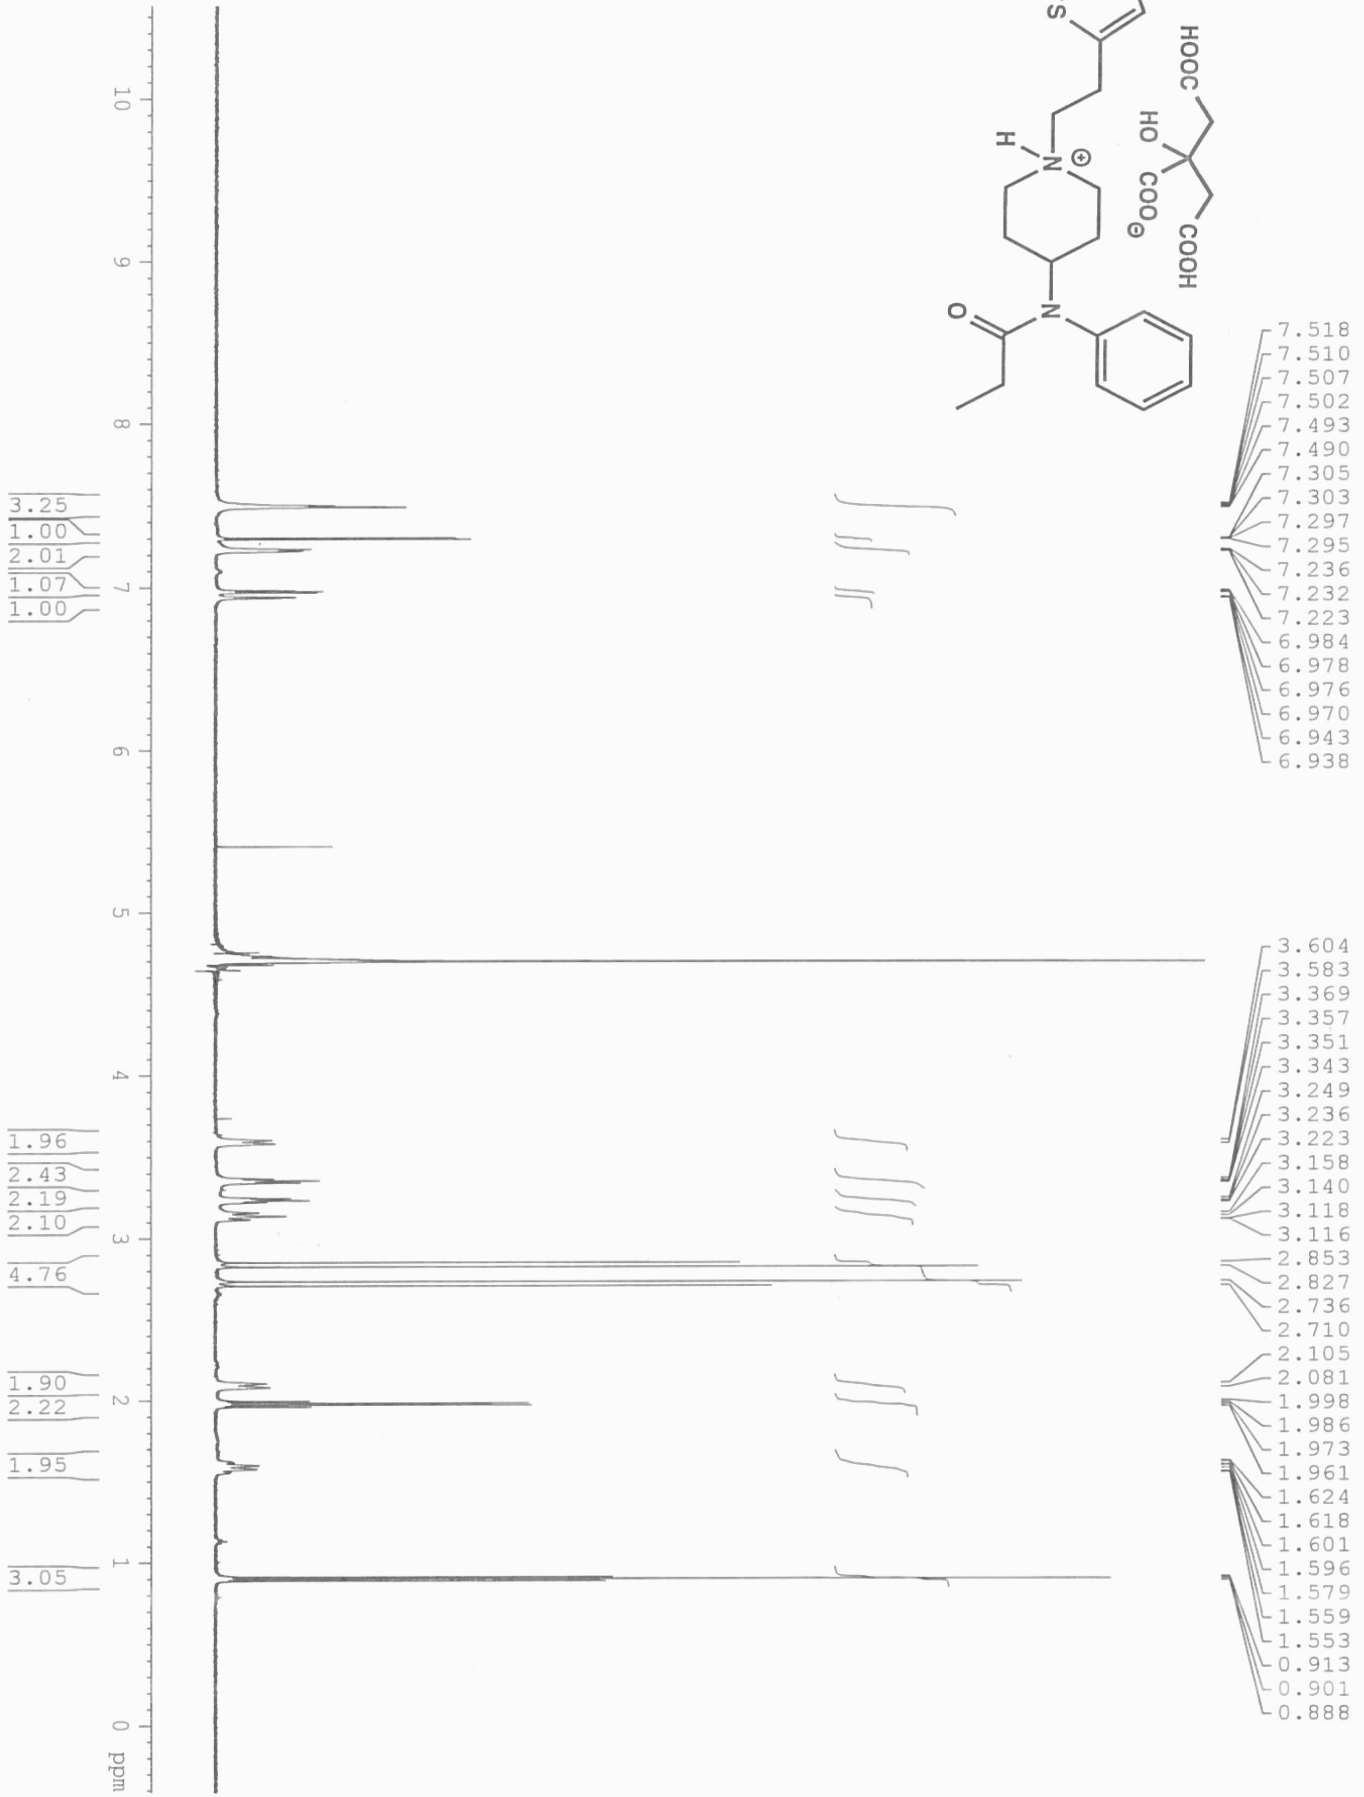



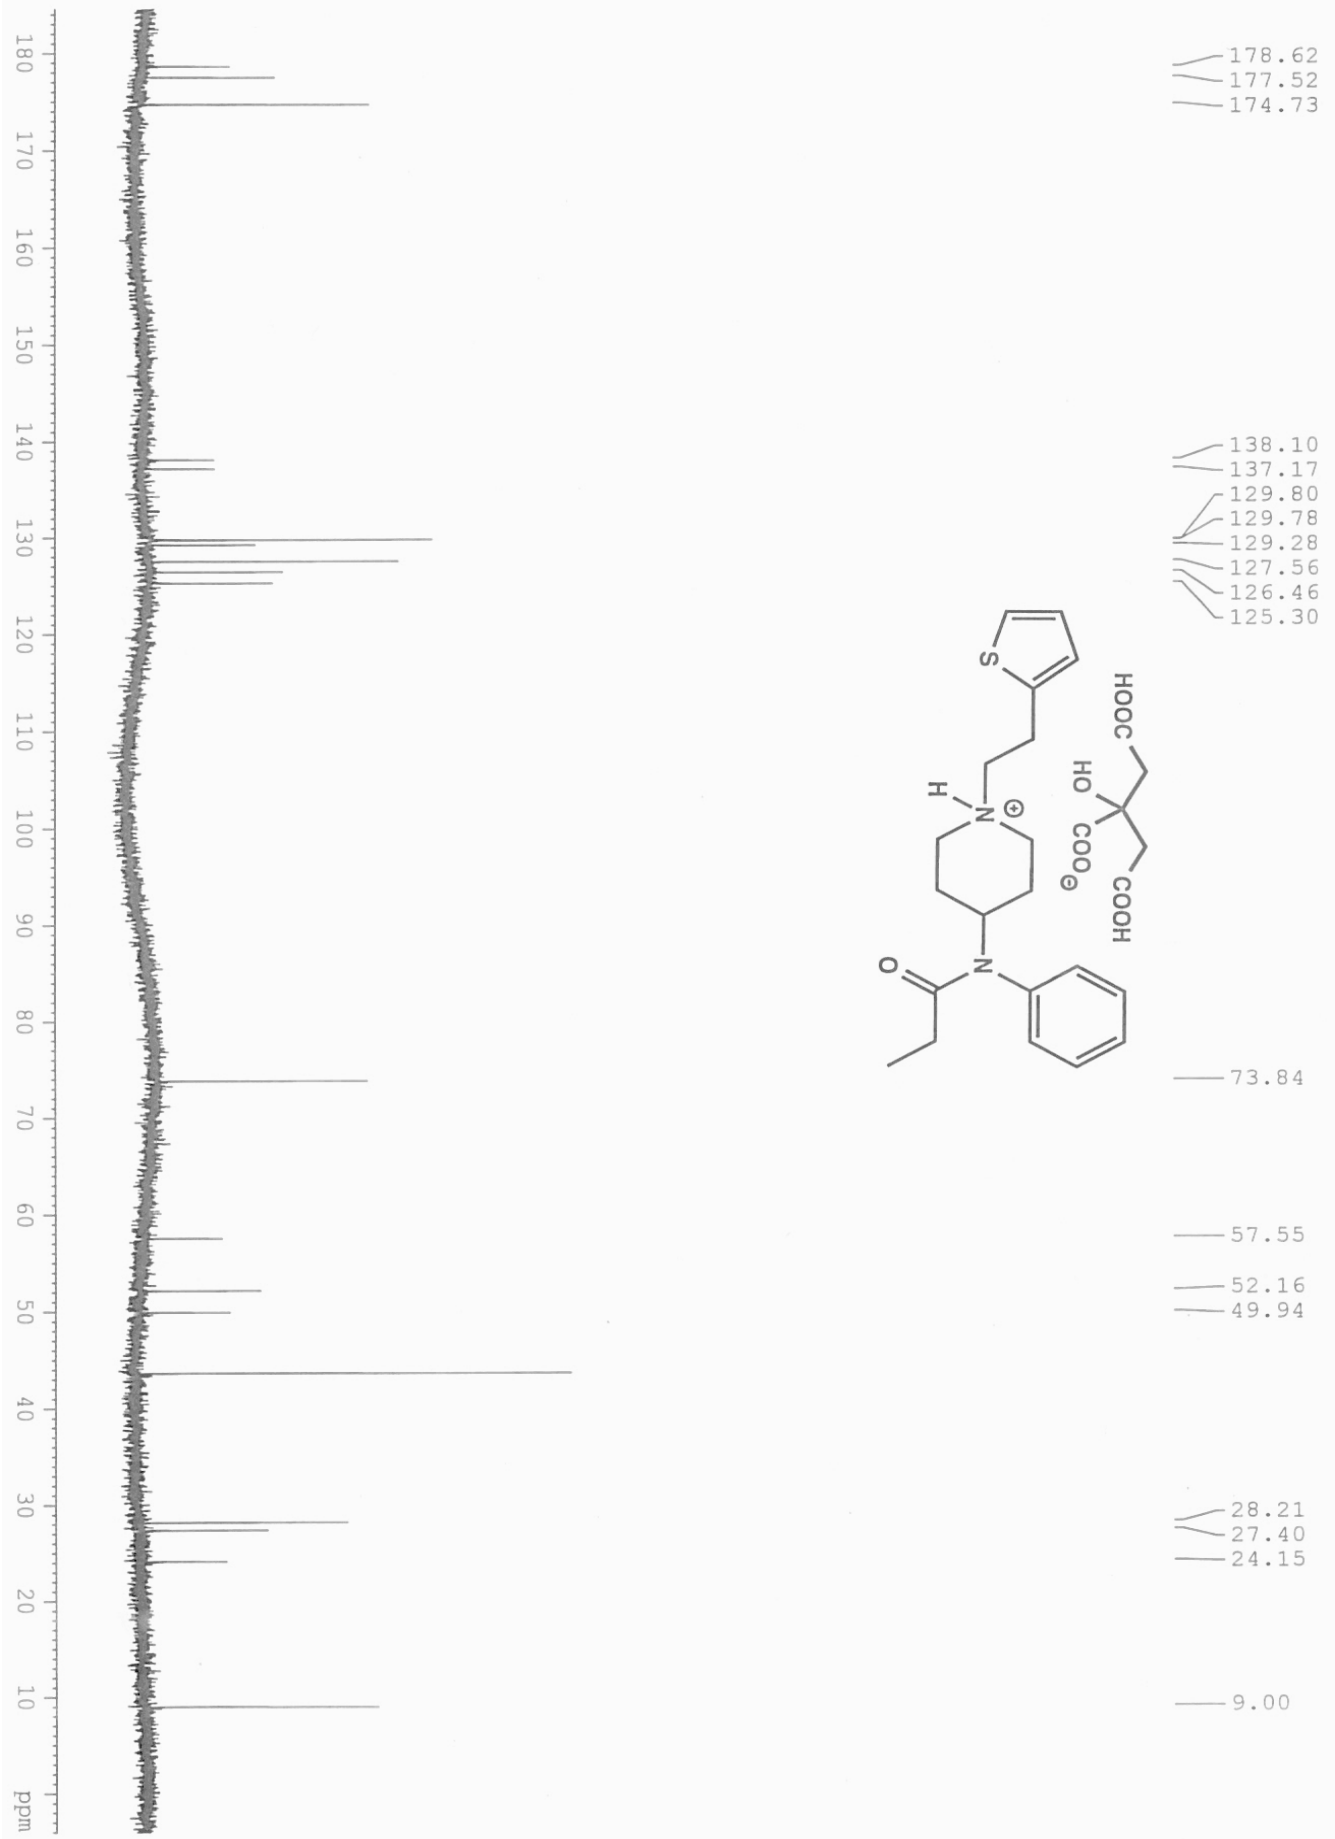

Acetyl[thiofentanyl] (free base)  
5-6-14

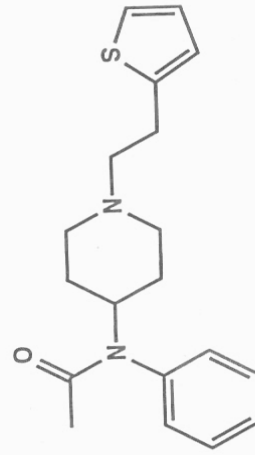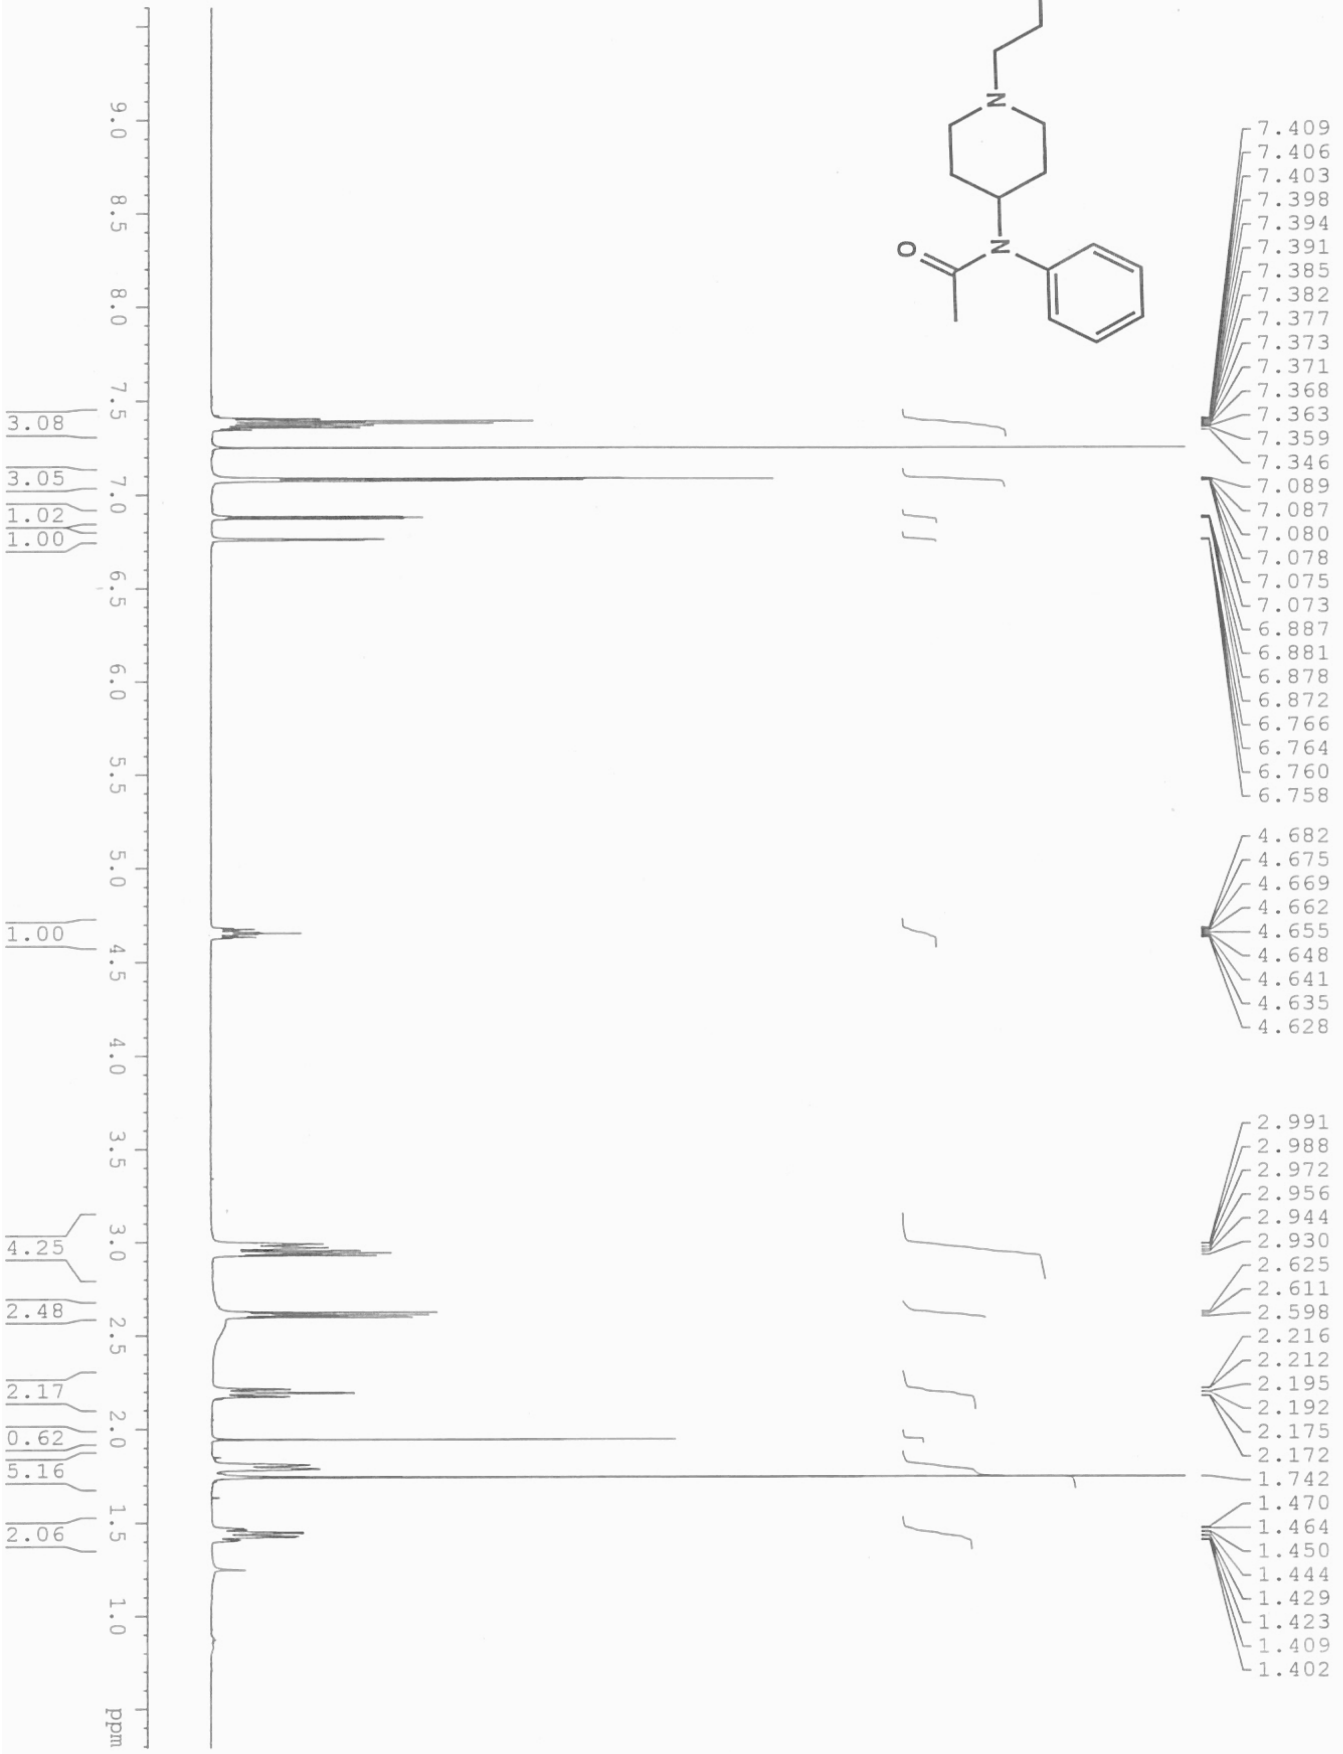

Acetylthiofentanyl 1 (Free base)  
CV8-154  
5-6-14

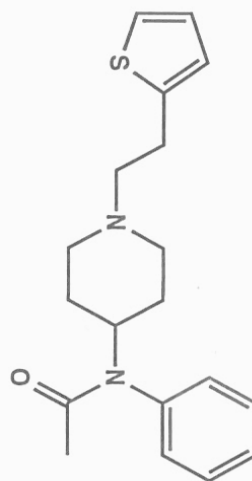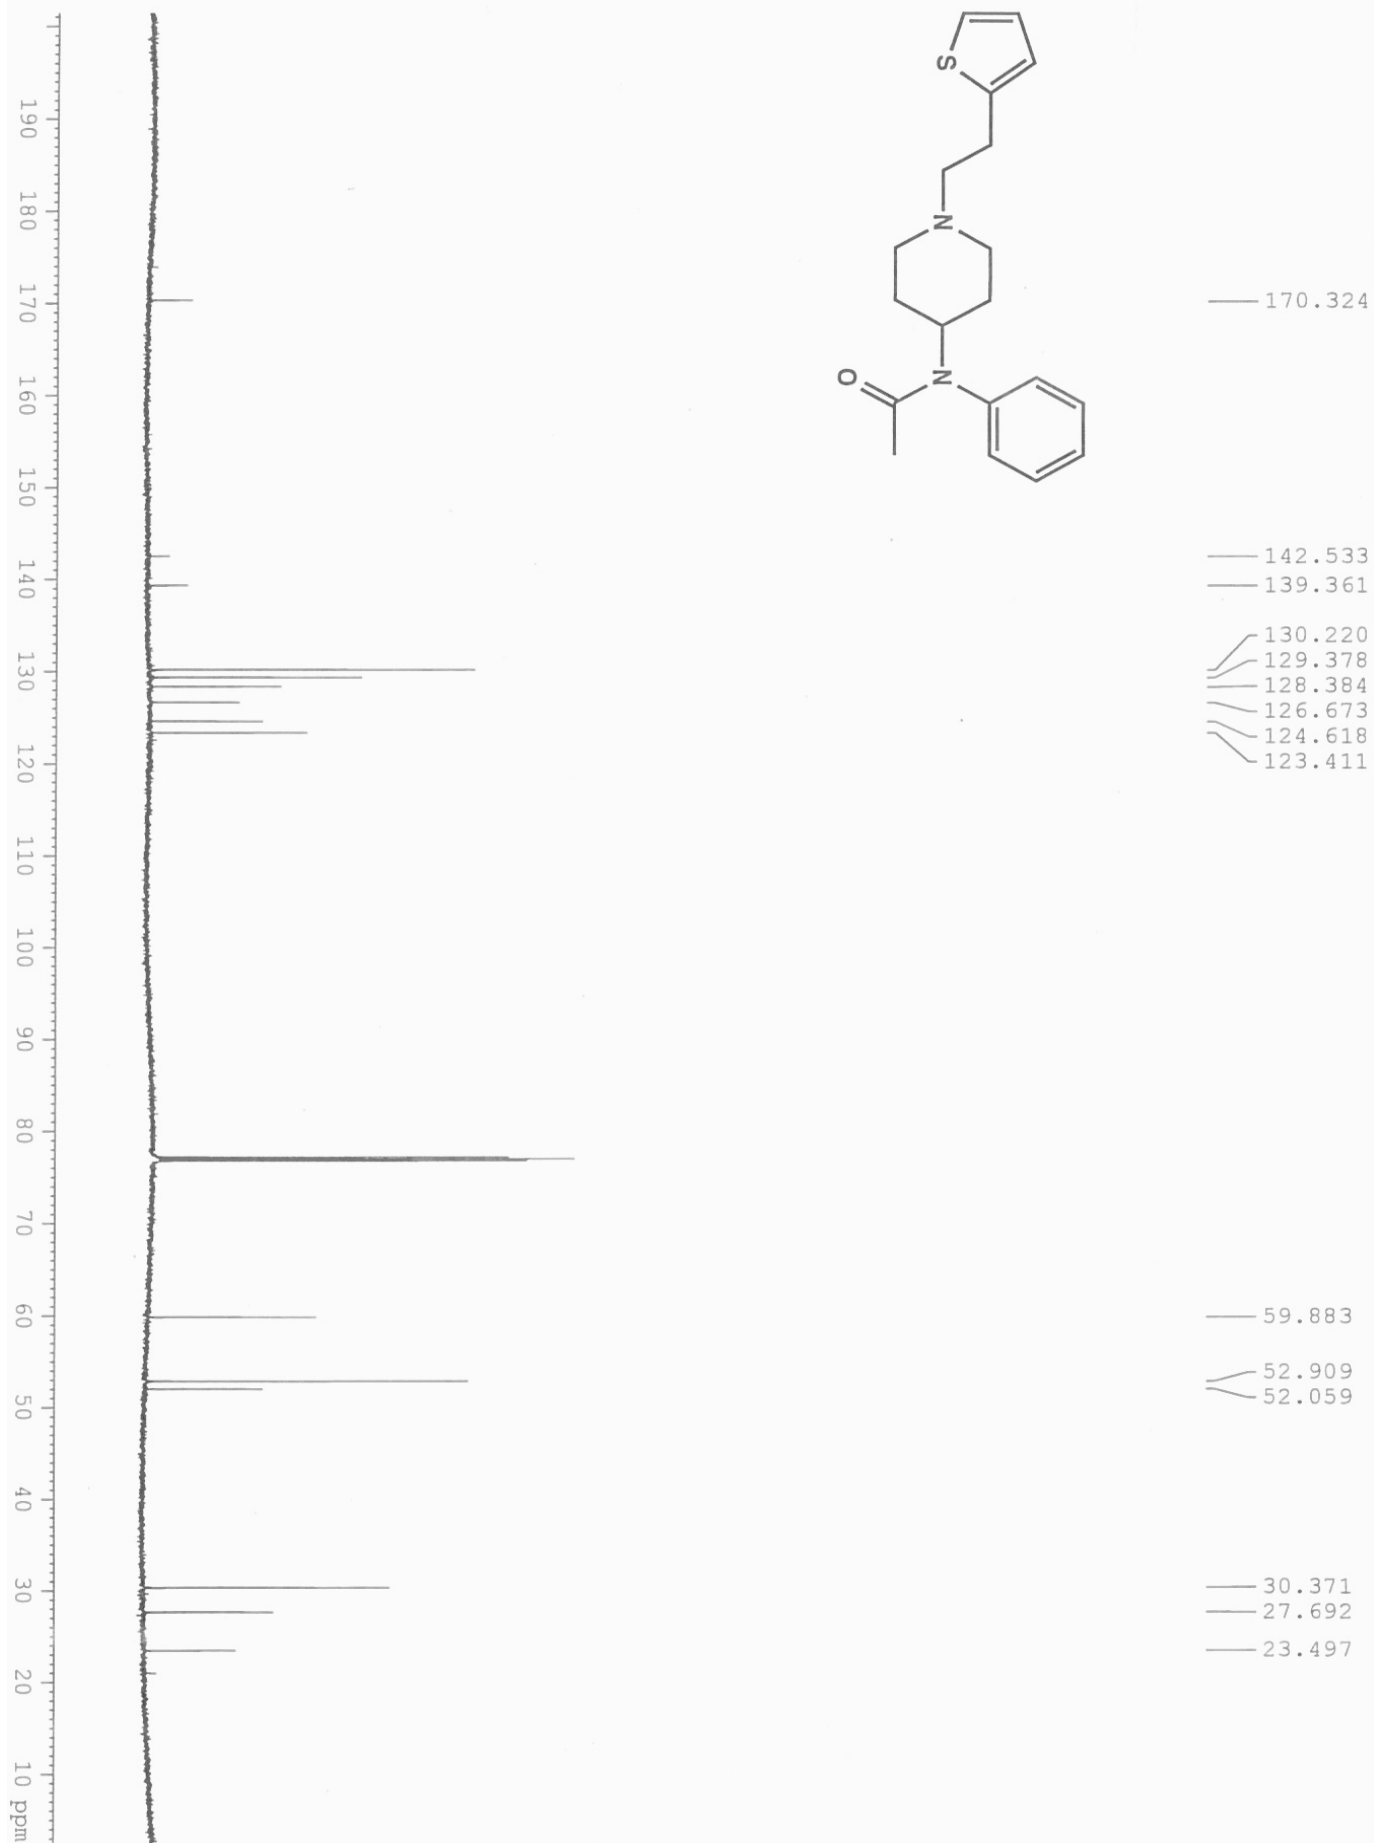

Acetylthiofentanyl (HCl salt)  
CV8-180  
5-7-14

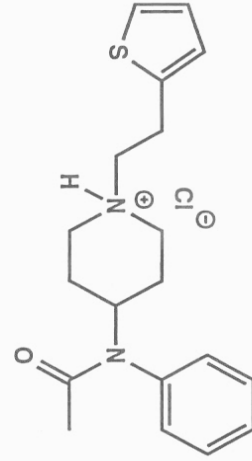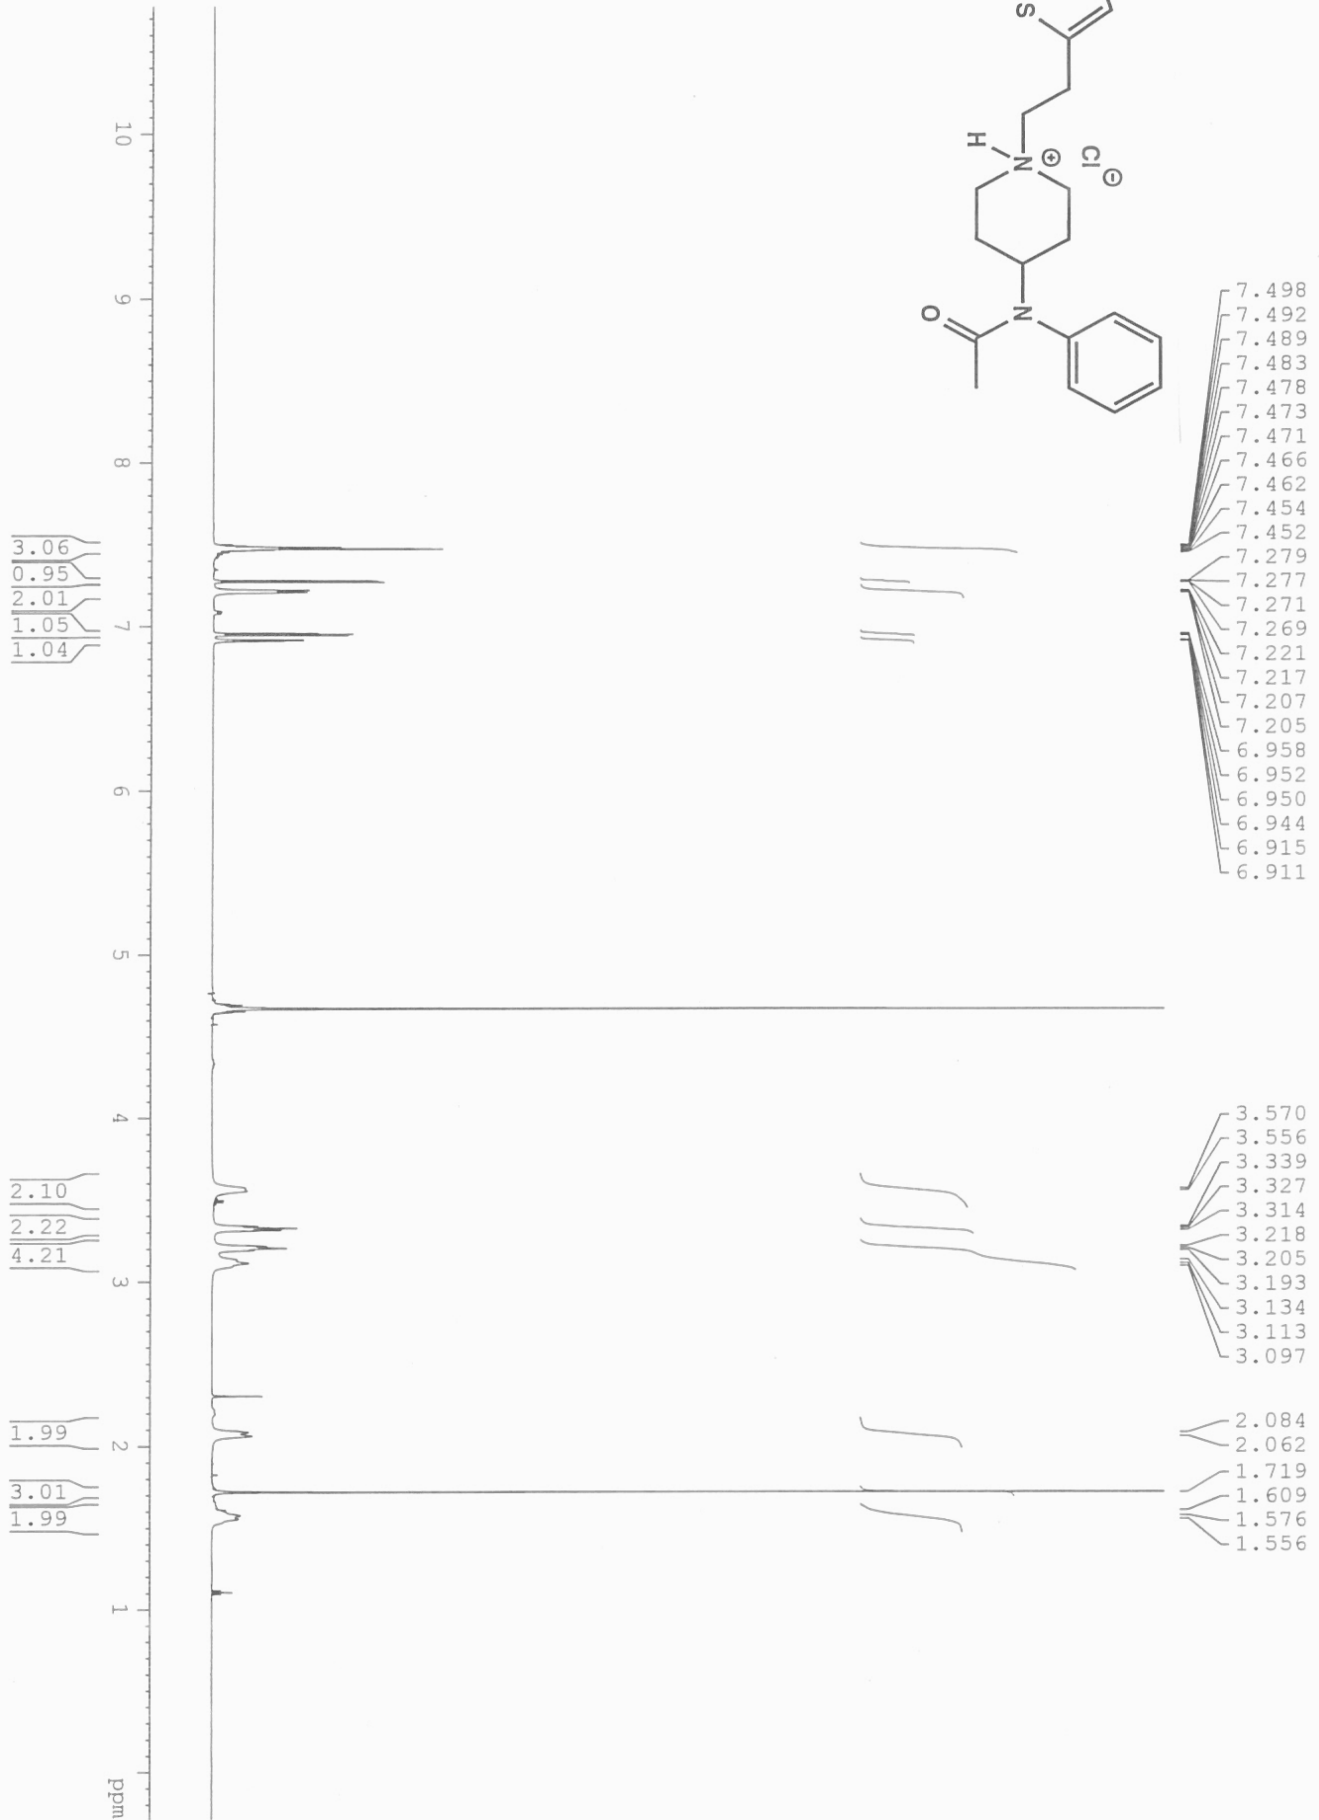

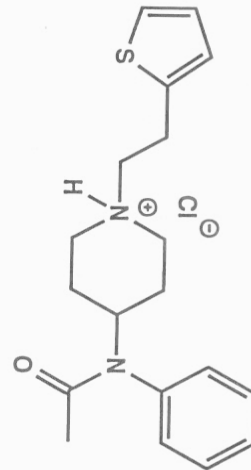

174.096

138.020  
137.580  
129.771  
129.621  
129.268  
127.507  
126.427  
125.262

57.496

52.071  
49.850

27.310  
24.114  
22.440

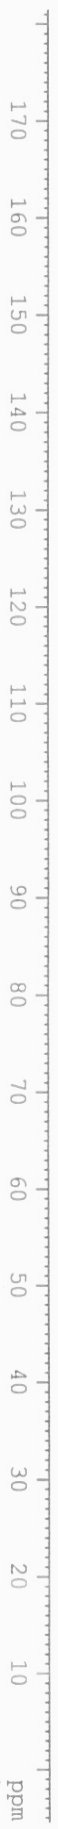

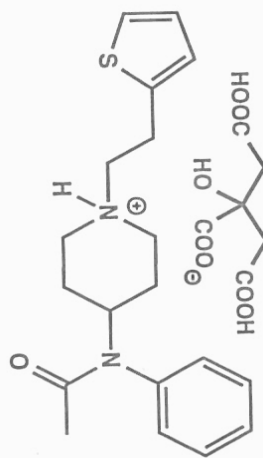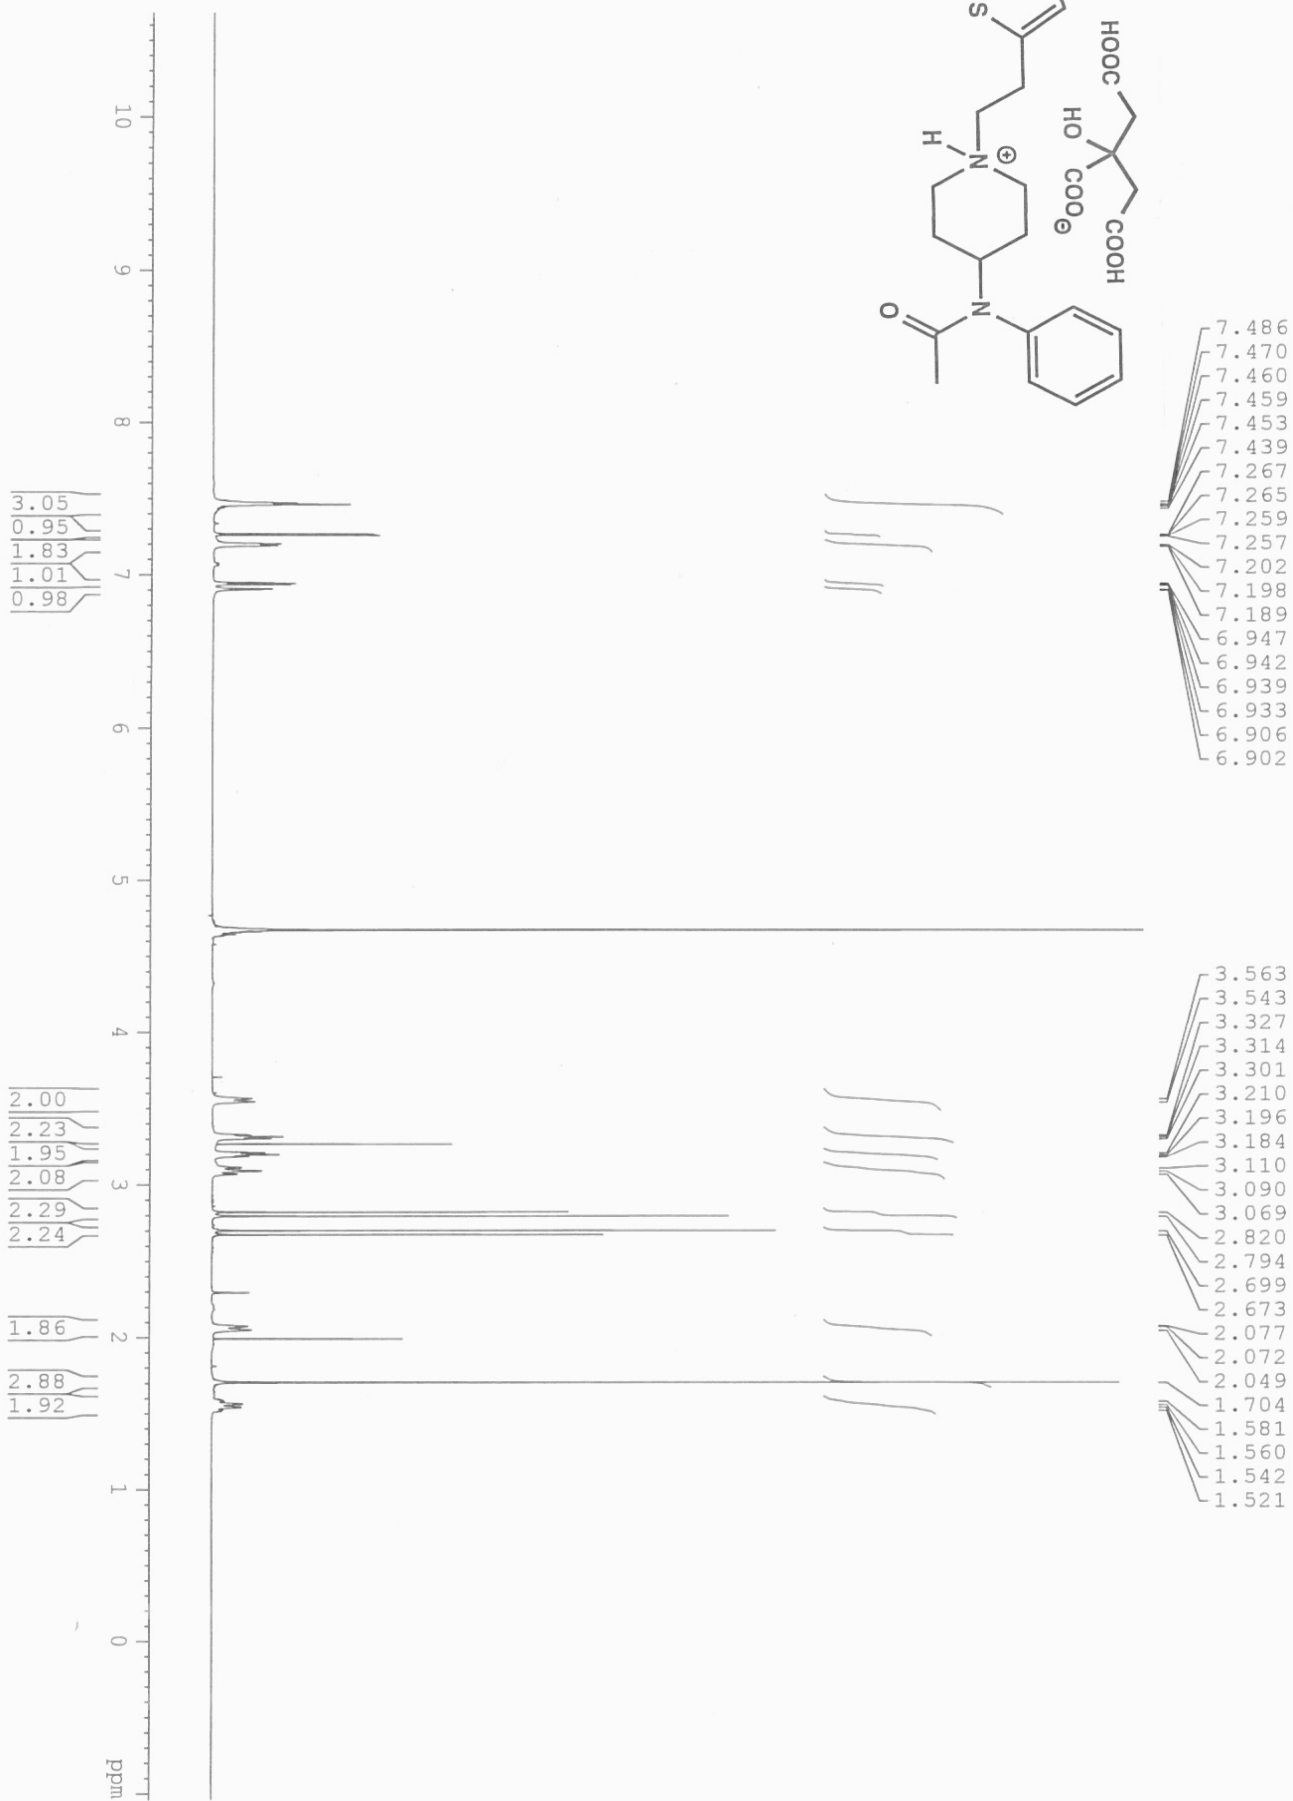

CV8-181  
Acetylthiofentanyl citrate  
5-7-14

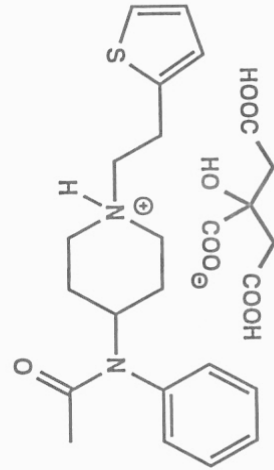

178.277  
174.417  
174.055

138.053  
137.536  
129.764  
129.613  
129.267  
127.509  
126.407  
125.230

73.654

57.471

52.054

49.826

43.515

27.298

24.081

22.442

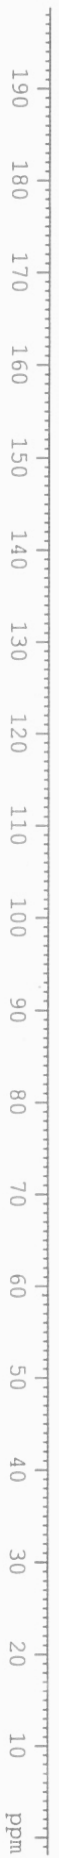

Supplement: pone.0108250.s001.pdf [file pone.0108250.s001.pdf]
